# Supplementary material
Source: publisher figshare collection journal article supplement (https://gsajournals.figshare.com/ndownloader/files/21348081)
Supplement: Supplementary file 1 [file 21348081]

## Sheet: Up at 0 hr
Table S4: genes significantly differentially regulated in w1118 leg imaginal discs between 18 hr before puparium formation and puparium formation (0 hr)
Sheet 1: genes significantly up-regulated at 0 hr
gene	locus	FPKM at -18 hr	FPKM at 0 hr	log2.fold_change.	p_value	q_value	Included in bioinformatic analyses? ( >1.5 fold-change, >5 FPKM)	ActualFoldChange
a	2R:18024493-18062243	11.0413	18.2483	0.72485	0.0002	0.00137166	yes	1.65273
aay	3L:9404158-9419777	2.4285	20.8446	3.10154	0.00875	0.0343977	yes	8.58332
Acp32CD	2L:11013220-11066997	9.53014	28.0242	1.55611	0.01	0.0382752	yes	2.94059
Ag5r	X:14679125-14680266	3.55423	161.258	5.50369	5e-05	0.000385856	yes	45.3707
alphaCop	3L:1641065-1645235	104.315	163.471	0.648092	5e-05	0.000385856	yes	1.56709
alpha-Est10	3R:3312304-3317278	1.24854	8.54353	2.77459	5e-05	0.000385856	yes	6.84282
alt	3R:13499902-13508234	86.0385	222.265	1.36923	5e-05	0.000385856	yes	2.58332
Ama	3R:2588314-2590983	116.41	206.068	0.8239	5e-05	0.000385856	yes	1.77019
Aprt	3L:1883891-1884885	12.8789	23.9659	0.895972	0.0003	0.0019424	yes	1.86087
Arf72A	3L:15976220-15980911	72.8191	117.828	0.694288	0.00025	0.00166137	yes	1.61809
Argk	3L:9041961-9059127	1033.01	1613.68	0.643507	5e-05	0.000385856	yes	1.56211
atl	3R:20451396-20460436	61.4462	94.9461	0.627784	5e-05	0.000385856	yes	1.54519
Awh	3L:3846152-3861697	4.87739	7.96696	0.707921	0.00095	0.00537497	yes	1.63345
b	2L:13821202-13823894	1.19855	15.0096	3.64652	5e-05	0.000385856	yes	12.5231
bbg	3L:14405920-14506348	20.5179	52.1675	1.34626	5e-05	0.000385856	yes	2.54254
Bet1	3L:19254516-19255261	35.9996	69.165	0.942063	5e-05	0.000385856	yes	1.92127
betaCop	X:18275579-18279228	126.494	211.929	0.744517	5e-05	0.000385856	yes	1.67541
beta'Cop	2L:13378896-13382382	102.859	159.143	0.629652	5e-05	0.000385856	yes	1.5472
betaTub60D	2R:20193404-20200626	152.503	348.51	1.19236	5e-05	0.000385856	yes	2.28527
betaTub97EF	3R:23792729-23814089	9.43338	31.3402	1.73217	5e-05	0.000385856	yes	3.32227
Blimp-1	3L:5624082-5642049	7.64889	94.1559	3.62173	5e-05	0.000385856	yes	12.3097
boca	2R:3453374-3454240	112.005	180.432	0.687894	5e-05	0.000385856	yes	1.61093
CaBP1	2L:16354938-16356761	323.115	586.07	0.859025	5e-05	0.000385856	yes	1.81381
Cad86C	3R:6652800-6674235	22.9937	39.7292	0.788963	5e-05	0.000385856	yes	1.72783
Cad87A	3R:7719233-7727915	37.3048	60.5282	0.698245	5e-05	0.000385856	yes	1.62253
Cad96Cb	3R:21049877-21058043	5.94172	9.12352	0.618711	0.0008	0.00462714	yes	1.5355
CAH2	3L:12172978-12176455	7.3098	16.8684	1.20642	5e-05	0.000385856	yes	2.30764
Cam	2R:8146912-8162130	248.607	396.347	0.672896	5e-05	0.000385856	yes	1.59427
caps	3L:13221788-13272742	12.2816	18.5682	0.596335	5e-05	0.000385856	yes	1.51187
Cat	3L:18815705-18821294	214.304	460.497	1.10353	5e-05	0.000385856	yes	2.1488
Catsup	2L:19041713-19045146	101.321	178.734	0.818876	5e-05	0.000385856	yes	1.76404
CBP	X:7175121-7299793	111.335	229.272	1.04216	5e-05	0.000385856	yes	2.0593
Cct1	3L:1546080-1553235	27.7092	46.5015	0.746914	5e-05	0.000385856	yes	1.6782
cenG1A	2L:13835566-13898715	9.14791	16.575	0.857498	5e-05	0.000385856	yes	1.81189
cer	2R:15283719-15284279	64.685	132.971	1.0396	5e-05	0.000385856	yes	2.05567
CG10157	3R:19504613-19505577	2.0949	16.862	3.00882	0.0002	0.00137166	yes	8.04907
CG10200	2R:10695928-10697436	130.172	204.856	0.654188	5e-05	0.000385856	yes	1.57373
CG1021	3R:2214883-2231613	31.2052	47.4112	0.603439	5e-05	0.000385856	yes	1.51934
CG1041	3R:2194675-2199747	34.4167	54.0708	0.651742	0.00065	0.00383464	yes	1.57106
CG10420	3R:21059357-21061240	7.1412	12.025	0.751801	0.00015	0.00106015	yes	1.68389
CG10616	3L:12464823-12467379	23.2057	34.8374	0.586156	5e-05	0.000385856	yes	1.50124
CG10623	2L:18955480-18957169	5.86416	15.4028	1.3932	5e-05	0.000385856	yes	2.6266
CG10625	3L:5531508-5544257	40.1228	94.2768	1.23248	5e-05	0.000385856	yes	2.34971
CG10627	3L:12520313-12523304	39.335	64.4143	0.711569	5e-05	0.000385856	yes	1.63758
CG10882	2L:2231776-2236826	66.1017	122.043	0.884633	5e-05	0.000385856	yes	1.84629
CG10908	2L:1974125-1975413	111.394	170.726	0.616016	5e-05	0.000385856	yes	1.53263
CG10936	2R:13492455-13526639	9.80134	25.1265	1.35816	5e-05	0.000385856	yes	2.56358
CG10960	3L:12817981-12836205	44.104	87.1323	0.982297	5e-05	0.000385856	yes	1.97561
CG10962	X:8801100-8947352	2.35638	10.5398	2.1612	0.00545	0.0231227	yes	4.47288
CG11007	2R:15390583-15391773	11.7225	17.6095	0.587075	0.00805	0.0321325	yes	1.5022
CG1104	3R:2893133-2900172	27.2486	41.9533	0.622603	0.0025	0.0122162	yes	1.53965
CG11137	3L:22857699-22861349	89.2497	139.939	0.648876	0.00025	0.00166137	yes	1.56795
CG1129	3R:639057-641747	41.9059	71.5355	0.771507	5e-05	0.000385856	yes	1.70705
CG11299	2R:19601424-19620706	1.21515	9.73416	3.00193	5e-05	0.000385856	yes	8.01067
CG11380	X:1085443-1090705	0.556073	10.5501	4.24584	5e-05	0.000385856	yes	18.9725
CG11438	3L:22459931-22461178	66.5398	103.321	0.634844	0.00015	0.00106015	yes	1.55277
CG11459	3R:1851831-1852962	0.726478	6.08381	3.06598	0.00205	0.0103601	yes	8.37439
CG11727	X:11326944-11348335	8.56107	13.0429	0.607397	0.00015	0.00106015	yes	1.52351
CG11835	2L:560793-563303	7.93191	25.0752	1.66052	5e-05	0.000385856	yes	3.16131
CG11880	3R:24949103-24953972	11.0984	27.7058	1.31984	5e-05	0.000385856	yes	2.49638
CG11892	3R:21107269-21108964	1.11316	5.93373	2.41428	0.0002	0.00137166	yes	5.33053
CG11905	3L:16921476-16928632	15.0594	72.3087	2.26351	5e-05	0.000385856	yes	4.80157
CG11966	3R:4777710-4788683	0.121849	35.6049	8.19084	0.00025	0.00166137	yes	292.205
CG11999	3R:1179438-1180469	87.5729	148.234	0.759325	5e-05	0.000385856	yes	1.69269
CG12009	3L:3294751-3298963	1.51259	10.6845	2.82044	5e-05	0.000385856	yes	7.06371
CG12026	3L:1885658-1891470	17.3244	48.2863	1.47881	5e-05	0.000385856	yes	2.78718
CG12030	3L:648516-651313	24.1333	37.8047	0.64754	5e-05	0.000385856	yes	1.5665
CG12063	3R:27324960-27332716	28.8771	264.659	3.19614	5e-05	0.000385856	yes	9.16501
CG12213	3R:7791011-7793236	59.7487	101.456	0.76387	5e-05	0.000385856	yes	1.69805
CG12214	2R:6029844-6079899	4.45738	8.53614	0.937389	0.00065	0.00383464	yes	1.91506
CG12432	X:17426860-17428651	5.11025	12.9908	1.34603	5e-05	0.000385856	yes	2.54211
CG12551	2R:1808437-1808752	8.83539	52.4908	2.5707	0.0051	0.0219752	yes	5.94097
CG1273	3L:4263720-4277782	15.8369	41.163	1.37806	5e-05	0.000385856	yes	2.59918
CG12918	2R:5936984-5939682	37.2619	119.616	1.68264	5e-05	0.000385856	yes	3.21014
CG13023	3L:16917437-16920534	29.3891	115.252	1.97144	5e-05	0.000385856	yes	3.92159
CG13053	3L:16252136-16252560	7.47818	30.6468	2.03498	0.00465	0.0204057	yes	4.09816
CG13081	2L:19540692-19541343	1.05559	24.6231	4.54389	0.00045	0.00277317	yes	23.3264
CG13082	2L:19538428-19539910	23.9713	294.95	3.62109	5e-05	0.000385856	yes	12.3043
CG13139	2L:10364464-10366410	98.256	161.721	0.718891	5e-05	0.000385856	yes	1.64591
CG13284	2L:16843191-16848713	4.71227	25.7653	2.45093	5e-05	0.000385856	yes	5.4677
CG13300	3L:6324129-6325996	34.0405	53.4269	0.650316	0.0001	0.000742932	yes	1.56951
CG13321	2R:8841060-8842675	0.600724	13.3112	4.4698	0.00105	0.00585185	yes	22.1586
CG13335	2R:9459028-9460045	3.39421	11.936	1.81417	5e-05	0.000385856	yes	3.51658
CG13393	2L:8382814-8384132	377.557	568.501	0.590467	5e-05	0.000385856	yes	1.50574
CG1342	3R:26516365-26518490	29.95	482.414	4.00964	5e-05	0.000385856	yes	16.1073
CG13606	3R:19998352-20009752	2.08438	16.2764	2.96509	0.0009	0.00512934	yes	7.80875
CG13748	2R:4827919-4828641	0.445453	55.159	6.95218	0.0072	0.0291609	yes	123.827
CG13784	2L:7205249-7220029	8.68194	13.1554	0.599567	0.00035	0.00223239	yes	1.51526
CG13857	3R:18215501-18219826	19.2226	33.6874	0.809405	0.00075	0.00436447	yes	1.75249
CG13966	2L:19969483-20017282	4.85344	18.3333	1.91739	5e-05	0.000385856	yes	3.77738
CG14073	3L:18795361-18802512	7.63586	19.8265	1.37657	5e-05	0.000385856	yes	2.5965
CG1418	2R:5846623-5852567	34.0223	68.0013	0.99908	0.0001	0.000742932	yes	1.99873
CG14232	X:19596014-19598178	17.5163	29.0835	0.731502	5e-05	0.000385856	yes	1.66037
CG14257	3R:22901604-22908543	4.61432	10.2711	1.1544	5e-05	0.000385856	yes	2.22592
CG14291	3R:14736772-14738641	44.4059	81.562	0.877147	5e-05	0.000385856	yes	1.83674
CG14351	2L:1555158-1611125	7.86783	22.1317	1.49208	5e-05	0.000385856	yes	2.81294
CG14372	3R:9276311-9291828	2.98938	6.94549	1.21623	5e-05	0.000385856	yes	2.32339
CG1440	X:8331112-8334969	48.2465	126.037	1.38535	5e-05	0.000385856	yes	2.61236
CG14470	2R:1812361-1818868	3.55919	16.7714	2.23639	5e-05	0.000385856	yes	4.71214
CG14478	2R:13345185-13353085	38.862	59.0906	0.60457	5e-05	0.000385856	yes	1.52052
CG14629	X:945569-946661	7.28582	24.1047	1.72615	5e-05	0.000385856	yes	3.30844
CG14681	3R:6512664-6522190	24.5459	53.79	1.13186	5e-05	0.000385856	yes	2.1914
CG14687	3R:6618627-6619370	0.66018	18.5169	4.80984	0.00025	0.00166137	yes	28.0483
CG14869	3R:11267964-11301915	8.11579	30.7286	1.92078	5e-05	0.000385856	yes	3.78627
CG14960	3L:3271037-3276259	1.28018	12.1506	3.24662	5e-05	0.000385856	yes	9.49132
CG14971	3L:3466413-3471338	7.85334	12.0775	0.620947	0.0003	0.0019424	yes	1.53788
CG1499	3R:27368753-27391887	28.1168	163.51	2.53988	5e-05	0.000385856	yes	5.81538
CG15011	3L:4254773-4259152	10.8677	18.977	0.804211	0.00015	0.00106015	yes	1.74618
CG15099	2R:14722769-14733368	9.62167	16.9653	0.818231	5e-05	0.000385856	yes	1.76324
CG15309	X:10100625-10106379	6.43093	20.7523	1.69017	5e-05	0.000385856	yes	3.22695
CG15544	3R:26653571-26667756	4.11008	42.7887	3.37999	5e-05	0.000385856	yes	10.4107
CG15589	3R:2024534-2033403	2.43429	9.77324	2.00534	5e-05	0.000385856	yes	4.01482
CG15628	2L:4821775-4828552	5.57759	20.1004	1.84951	5e-05	0.000385856	yes	3.60378
CG15745	X:13198914-13201427	1.5774	5.39201	1.77328	5e-05	0.000385856	yes	3.41829
CG15756	X:13428505-13429836	11.3773	122.115	3.42401	5e-05	0.000385856	yes	10.7332
CG15822	3L:2153200-2163860	6.87855	20.2501	1.55775	5e-05	0.000385856	yes	2.94395
CG15905	2R:15533987-15535150	106.823	288.995	1.43582	5e-05	0.000385856	yes	2.70536
CG16711	3L:9697769-9702809	4.73981	7.77564	0.714132	5e-05	0.000385856	yes	1.6405
CG16721	X:5773890-5777433	22.0117	35.6304	0.69484	5e-05	0.000385856	yes	1.6187
CG16733	3R:5077574-5078687	87.375	280.359	1.68198	5e-05	0.000385856	yes	3.20869
CG16786	2R:19969254-19973683	39.902	81.7904	1.03547	5e-05	0.000385856	yes	2.04978
CG16926	2R:15385258-15388801	2.73997	20.5675	2.90813	5e-05	0.000385856	yes	7.50647
CG17124	2L:10744074-10756316	3.23121	14.9558	2.21056	5e-05	0.000385856	yes	4.62854
CG17127	2L:10770866-10771370	0.907679	13.2358	3.86612	0.0016	0.0083929	yes	14.582
CG17271	3R:16644848-16647587	94.373	242.816	1.36342	5e-05	0.000385856	yes	2.57294
CG1749	X:11377539-11379097	118.543	183.67	0.631706	5e-05	0.000385856	yes	1.5494
CG17593	2L:3514736-3517111	40.1251	60.6266	0.595446	5e-05	0.000385856	yes	1.51094
CG17672	3L:13022063-13029537	99.1249	180.427	0.864093	5e-05	0.000385856	yes	1.8202
CG17754	X:9144459-9149853	73.4321	139.009	0.920691	5e-05	0.000385856	yes	1.89303
CG17816	3R:3683895-3712441	3.1224	5.18267	0.731044	0.00195	0.0099486	yes	1.65984
CG17834	2L:8529142-8541462	14.7094	25.8597	0.813962	5e-05	0.000385856	yes	1.75804
CG1837	X:11610820-11613927	91.9358	147.934	0.686258	5e-05	0.000385856	yes	1.6091
CG18507	2L:13665527-13670854	26.2997	69.1029	1.3937	5e-05	0.000385856	yes	2.62752
CG18508	X:3066480-3067155	5.59743	10.6637	0.929873	0.0124	0.0456657	yes	1.90511
CG18547	3R:7804295-7806112	39.7512	62.2055	0.646043	5e-05	0.000385856	yes	1.56487
CG1888	2R:5432676-5434459	31.5043	51.2625	0.702354	5e-05	0.000385856	yes	1.62716
CG2016	3R:782716-787070	24.3177	77.8577	1.67883	5e-05	0.000385856	yes	3.20169
CG2023	3R:1649251-1650226	16.146	32.1886	0.995377	5e-05	0.000385856	yes	1.9936
CG2150	3R:27589025-27590488	1.25798	41.2578	5.03548	5e-05	0.000385856	yes	32.7969
CG2162	3L:3035197-3040469	30.1883	45.3521	0.587183	5e-05	0.000385856	yes	1.50231
CG2201	2L:21614762-21623599	4.0639	9.40617	1.21074	5e-05	0.000385856	yes	2.31457
CG2233	X:7929764-7931533	8.67396	38.8657	2.16374	5e-05	0.000385856	yes	4.48073
CG2556	X:12391193-12410580	6.37331	11.6597	0.871415	5e-05	0.000385856	yes	1.82946
CG2663	3R:1226315-1229851	5.74449	15.4752	1.42971	0.00015	0.00106015	yes	2.69392
CG2852	2R:18532447-18533851	3981.69	7258.61	0.866313	5e-05	0.000385856	yes	1.823
CG2911	3R:1442367-1449844	9.77405	17.0138	0.799676	0.0106	0.0402302	yes	1.74071
CG2918	X:2165317-2169111	112.125	277.08	1.30519	5e-05	0.000385856	yes	2.47117
CG30115	2R:14441623-14500235	9.58163	16.8998	0.818667	5e-05	0.000385856	yes	1.76377
CG30291	2R:16895259-16897078	39.9637	67.9796	0.766413	5e-05	0.000385856	yes	1.70103
CG30344	2R:5032753-5036019	9.54948	19.9211	1.06081	5e-05	0.000385856	yes	2.08609
CG3036	2L:4892114-4903889	15.5119	26.7936	0.788516	5e-05	0.000385856	yes	1.72729
CG30428	2R:21140836-21142371	7.71864	12.2887	0.670918	0.0002	0.00137166	yes	1.59208
CG30463	2R:12560965-12618889	23.6205	54.4293	1.20434	5e-05	0.000385856	yes	2.30432
CG30497	2R:3625272-3670119	4.70276	8.13083	0.789894	5e-05	0.000385856	yes	1.72895
CG3097	X:5658607-5684952	3.76015	8.10324	1.10771	0.0027	0.013008	yes	2.15503
CG31012	3R:26634348-26652542	30.8261	48.9953	0.668493	5e-05	0.000385856	yes	1.58941
CG31462	3R:4204892-4303315	3.81255	7.80129	1.03296	5e-05	0.000385856	yes	2.04621
CG31523	3R:291138-304828	39.6677	84.3071	1.08769	5e-05	0.000385856	yes	2.12533
CG31531	3R:485304-530979	6.95138	12.1025	0.799937	5e-05	0.000385856	yes	1.74102
CG31534	3R:531457-537915	13.165	20.9632	0.671148	5e-05	0.000385856	yes	1.59234
CG31559	3R:1975837-1982949	3.28588	13.5552	2.0445	5e-05	0.000385856	yes	4.12529
CG31636	2L:6656458-6657879	0.339673	6.39586	4.23492	0.0004	0.00250285	yes	18.8295
CG31678	2L:20656427-20675941	15.099	23.9066	0.662958	0.0001	0.000742932	yes	1.58332
CG31710	2L:9700795-9708883	22.6449	38.6948	0.772955	0.01155	0.0432041	yes	1.70876
CG31777	2L:3706542-3707060	5.24672	46.2756	3.14076	0.0001	0.000742932	yes	8.81991
CG31869	2L:10772037-10801107	44.9302	103.034	1.19736	5e-05	0.000385856	yes	2.2932
CG32039	3L:9352081-9353096	4.55724	7.80842	0.77687	0.00645	0.0266268	yes	1.71341
CG32091	3L:11624494-11636004	3.59186	5.72034	0.671371	0.00165	0.00860773	yes	1.59258
CG32150	3L:15830863-15837158	4.03406	7.38313	0.872	5e-05	0.000385856	yes	1.8302
CG32159	3L:16412893-16516025	1.35258	8.83502	2.70752	0.00025	0.00166137	yes	6.53198
CG32276	3L:3197862-3218920	302.459	625.88	1.04915	5e-05	0.000385856	yes	2.06931
CG32365	3L:7862143-7887914	3.37016	7.54941	1.16355	5e-05	0.000385856	yes	2.24007
CG32372	3L:7512587-7521116	3.34507	8.27542	1.3068	5e-05	0.000385856	yes	2.47392
CG32447	3L:21685901-21699447	83.4226	190.663	1.19252	5e-05	0.000385856	yes	2.28551
CG32486	3L:3055903-3070839	23.9898	38.5777	0.685346	5e-05	0.000385856	yes	1.60809
CG32645	X:13033238-13048957	0.379009	7.13693	4.235	5e-05	0.000385856	yes	18.8305
CG32662	X:11711790-11729759	4.02575	6.36765	0.661503	0.0028	0.013362	yes	1.58173
CG32699	X:9465569-9474008	9.01572	15.8771	0.816429	5e-05	0.000385856	yes	1.76105
CG32762	X:5394297-5395219	1.1944	533.35	8.80265	0.00025	0.00166137	yes	446.542
CG32972	2L:14161234-14180681	6.04799	10.7072	0.82406	5e-05	0.000385856	yes	1.77037
CG33169	3L:22856963-22857596	34.8989	119.293	1.77325	5e-05	0.000385856	yes	3.41825
CG33181	X:8379025-8410015	8.13897	13.0531	0.681475	0.00035	0.00223239	yes	1.60378
CG3328	2R:20050012-20061150	23.5689	43.2037	0.874272	5e-05	0.000385856	yes	1.83308
CG3355	2L:4651402-4652877	4.95441	55.4275	3.48382	5e-05	0.000385856	yes	11.1875
CG3376	2R:20145551-20152746	11.496	19.9442	0.79484	5e-05	0.000385856	yes	1.73488
CG33936	3R:5167591-5185154	48.9952	87.4683	0.836119	5e-05	0.000385856	yes	1.78524
CG33967	3R:10524251-10549978	12.1774	18.5248	0.605246	5e-05	0.000385856	yes	1.52124
CG3397	3R:7808819-7810263	1.64746	6.04307	1.87503	0.00195	0.0099486	yes	3.66811
CG33993	3L:5926135-5943755	12.4996	29.8537	1.25602	5e-05	0.000385856	yes	2.38837
CG34053	3R:13230195-13230831	0.546367	10.7388	4.29682	0.0068	0.0277905	yes	19.6549
CG34191	2R:12833059-12842660	146.36	268.83	0.877175	0.00045	0.00277317	yes	1.83677
CG34193	2R:13397454-13398246	1.36966	5.99348	2.12958	0.0003	0.0019424	yes	4.37589
CG34296	3R:25548263-25548735	3.17698	73.7298	4.53652	0.00015	0.00106015	yes	23.2075
CG34350	2R:4881046-4892622	20.0168	74.8526	1.90284	5e-05	0.000385856	yes	3.73949
CG34355	3R:19646335-19675071	5.442	10.7396	0.980732	5e-05	0.000385856	yes	1.97347
CG34360	3R:5700402-5814598	2.66145	7.45218	1.48545	0.0086	0.0339952	yes	2.80005
CG34380	2L:6179513-6209477	15.6645	26.6365	0.765905	5e-05	0.000385856	yes	1.70044
CG3493	2R:19254411-19264535	15.7844	23.9543	0.601784	0.00015	0.00106015	yes	1.51759
CG3534	3R:12822173-12828077	24.9122	37.8438	0.603208	0.0122	0.0450842	yes	1.51909
CG3600	X:1836775-1888227	0.461425	16.183	5.13224	5e-05	0.000385856	yes	35.0718
CG3624	2R:18281566-18289561	64.6891	106.695	0.721897	5e-05	0.000385856	yes	1.64935
CG3823	X:6198022-6200778	34.7983	124.975	1.84455	5e-05	0.000385856	yes	3.59141
CG3831	2R:18824801-18828467	5.62092	11.4919	1.03174	0.0026	0.01264	yes	2.04449
CG3884	2R:8835852-8839791	0.411697	5.703	3.79207	0.00035	0.00223239	yes	13.8524
CG3940	3R:5938267-5945142	3.27426	5.85693	0.838976	0.01255	0.04604	yes	1.78878
CG40439	2L:22690250-22690967	68.3443	104.176	0.608129	5e-05	0.000385856	yes	1.52428
CG4089	3R:6641012-6643214	6.03603	12.9414	1.10032	5e-05	0.000385856	yes	2.14403
CG4151	X:5395864-5396608	3.23603	809.845	7.96728	5e-05	0.000385856	yes	250.259
CG4164	2L:453110-454654	51.1447	110.172	1.10709	5e-05	0.000385856	yes	2.15412
CG42240	X:6224890-6226783	5.50859	9.86517	0.840662	0.0001	0.000742932	yes	1.79087
CG42326	2R:4460867-4471147	1.16647	12.42	3.41244	5e-05	0.000385856	yes	10.6475
CG42342	3R:12328522-12397082	29.1919	47.4413	0.700573	5e-05	0.000385856	yes	1.62515
CG42351	2R:14642499-14648577	1.02201	5.9849	2.54992	5e-05	0.000385856	yes	5.85601
CG42389	2L:16545032-16662012	20.3324	35.1518	0.789816	5e-05	0.000385856	yes	1.72886
CG42460	2L:3387897-3388496	1.63776	58.4132	5.15649	5e-05	0.000385856	yes	35.6665
CG4250	2R:18551192-18551979	2.7869	10.3303	1.89015	0.0027	0.013008	yes	3.70674
CG42527	X:1891619-1898128	1.66279	59.5923	5.16345	5e-05	0.000385856	yes	35.8387
CG42566	2R:18549438-18550746	1.51324	10.6131	2.81014	0.00055	0.0033225	yes	7.01349
CG42611	X:9253876-9394162	17.467	29.2807	0.745312	5e-05	0.000385856	yes	1.67634
CG4267	2L:2242378-2244415	2.13015	5.3152	1.31917	0.00545	0.0231227	yes	2.49522
CG42713	2L:8891488-8892180	0.437991	57.0415	7.02497	0.0053	0.0226999	yes	130.234
CG42717	3L:16025901-16026281	16.7702	422.031	4.65338	5e-05	0.000385856	yes	25.1655
CG4293	X:403450-424324	35.1559	54.5252	0.633155	0.00055	0.0033225	yes	1.55095
CG4374	3R:19234921-19297216	2.19413	16.9916	2.9531	5e-05	0.000385856	yes	7.74412
CG4382	2L:9598939-9600853	4.87916	31.4469	2.68822	5e-05	0.000385856	yes	6.44515
CG4502	2L:7194907-7204259	22.4476	38.5792	0.781258	5e-05	0.000385856	yes	1.71863
CG4552	2L:1129234-1134120	12.5188	20.0626	0.680413	5e-05	0.000385856	yes	1.6026
CG4586	X:6863973-6866302	31.8402	69.2494	1.12095	5e-05	0.000385856	yes	2.1749
CG4766	X:5891536-5894830	4.65309	11.4156	1.29474	5e-05	0.000385856	yes	2.45334
CG4914	3L:14665967-14740971	7.11413	73.0891	3.3609	5e-05	0.000385856	yes	10.2738
CG4928	X:16807230-16831444	4.72132	25.4258	2.42903	5e-05	0.000385856	yes	5.38532
CG5001	2L:1186255-1196806	14.6393	22.8573	0.642813	5e-05	0.000385856	yes	1.56137
CG5065	2R:12495174-12511214	2.44577	52.5208	4.42453	5e-05	0.000385856	yes	21.4741
CG5171	2L:7390983-7404526	2.97516	30.8681	3.37508	5e-05	0.000385856	yes	10.3753
CG5346	3R:18345803-18354383	41.234	68.4133	0.730441	5e-05	0.000385856	yes	1.65915
CG5382	3R:18188618-18191703	42.8736	66.3319	0.629612	0.00295	0.0139381	yes	1.54715
CG5399	3R:11520991-11522286	1.81732	21.745	3.5808	5e-05	0.000385856	yes	11.9654
CG5484	3R:22543569-22545529	70.8778	113.291	0.676626	5e-05	0.000385856	yes	1.5984
CG5618	3L:20347051-20349794	6.15087	11.3277	0.880989	0.0002	0.00137166	yes	1.84164
CG5639	3R:23408526-23419260	1.6662	44.3814	4.73532	5e-05	0.000385856	yes	26.6363
CG5697	3R:16841670-16842842	0.640347	23.84	5.21839	0.0001	0.000742932	yes	37.2298
CG5758	2L:18120026-18138210	30.9333	60.6356	0.971004	5e-05	0.000385856	yes	1.9602
CG5802	3R:16963991-16966087	40.1978	74.2684	0.885633	5e-05	0.000385856	yes	1.84757
CG5835	3R:14974350-14988000	7.87569	30.8149	1.96815	0.0004	0.00250285	yes	3.91266
CG5862	3R:17040781-17041948	30.1606	52.9556	0.812119	5e-05	0.000385856	yes	1.75579
CG5873	3R:13251493-13272215	8.3782	54.4108	2.69918	5e-05	0.000385856	yes	6.49433
CG5885	2L:9915254-9918165	467.637	1201.45	1.36132	5e-05	0.000385856	yes	2.56919
CG5958	2L:7430528-7433480	3.3683	16.2439	2.2698	5e-05	0.000385856	yes	4.82258
CG5976	3L:20466896-20470103	7.82023	22.7156	1.5384	5e-05	0.000385856	yes	2.90472
CG6013	3R:14857250-14858131	23.7021	36.2882	0.614485	0.001	0.00561337	yes	1.53101
CG6044	2R:18291677-18295880	16.6269	28.6789	0.786471	5e-05	0.000385856	yes	1.72485
CG6055	2L:7466545-7472493	1.72045	21.5066	3.64392	5e-05	0.000385856	yes	12.5006
CG6175	3L:11281021-11287887	3.87532	6.81058	0.813461	5e-05	0.000385856	yes	1.75742
CG6206	2L:10457655-10462475	20.7298	50.2522	1.27748	5e-05	0.000385856	yes	2.42415
CG6230	2L:11114182-11120314	27.6534	41.5921	0.588856	5e-05	0.000385856	yes	1.50405
CG6287	2L:11151505-11155716	260.242	402.294	0.628398	5e-05	0.000385856	yes	1.54585
CG6424	2R:13590839-13606832	7.90997	12.2447	0.630412	5e-05	0.000385856	yes	1.54801
CG6453	2L:17481987-17484302	114.826	176.649	0.621443	5e-05	0.000385856	yes	1.53841
CG6488	2L:11496793-11499119	11.7219	19.8843	0.762423	5e-05	0.000385856	yes	1.69634
CG6520	2R:13362702-13363566	3.35918	7.53668	1.16582	0.00995	0.0381521	yes	2.24361
CG6672	3R:7037961-7040239	39.0481	78.4559	1.00663	5e-05	0.000385856	yes	2.00921
CG6749	3L:9724337-9726907	2.69384	8.11257	1.59049	0.0001	0.000742932	yes	3.01153
CG6750	2L:10731399-10732406	63.8274	107.466	0.751631	5e-05	0.000385856	yes	1.6837
CG6770	2L:12045345-12046100	434.627	994.593	1.19433	5e-05	0.000385856	yes	2.28838
CG6776	3L:8511987-8513410	233.085	367.767	0.657934	5e-05	0.000385856	yes	1.57782
CG6847	X:17805495-17818199	4.421	13.4242	1.60239	5e-05	0.000385856	yes	3.03646
CG7011	3L:15152182-15156724	33.5232	58.8378	0.811582	0.00025	0.00166137	yes	1.75514
CG7173	3L:21548468-21551321	1.83971	8.35718	2.18354	5e-05	0.000385856	yes	4.54266
CG7337	2L:1884983-1943818	15.1645	22.8277	0.590086	5e-05	0.000385856	yes	1.50534
CG7447	3L:4384454-4403186	30.0098	84.522	1.49389	5e-05	0.000385856	yes	2.81648
CG7461	2R:15192667-15194689	57.5905	90.3318	0.649404	5e-05	0.000385856	yes	1.56852
CG7606	3R:13422257-13422639	9.36485	65.1012	2.79736	0.0002	0.00137166	yes	6.95165
CG7675	3R:14203841-14210723	381.924	868.398	1.18507	5e-05	0.000385856	yes	2.27375
CG7720	3R:14584957-14620876	12.2694	43.552	1.82767	5e-05	0.000385856	yes	3.54964
CG7778	2L:8346620-8350197	2.55349	22.6928	3.15169	5e-05	0.000385856	yes	8.88697
CG7802	3R:25644833-25651522	90.8422	210.15	1.20998	5e-05	0.000385856	yes	2.31335
CG7830	2L:8305589-8308188	150.634	291.26	0.951265	5e-05	0.000385856	yes	1.93356
CG7860	X:15463025-15468618	15.6846	33.3936	1.09023	5e-05	0.000385856	yes	2.12907
CG7872	X:15472122-15473896	35.9146	66.8714	0.896817	5e-05	0.000385856	yes	1.86196
CG7906	3L:14229823-14231372	1.35353	43.5982	5.00947	5e-05	0.000385856	yes	32.2107
CG7924	3L:14226568-14227710	1.17246	171.776	7.19485	5e-05	0.000385856	yes	146.509
CG8031	3R:8824306-8837010	61.3418	101.196	0.722205	0.0062	0.0258062	yes	1.64971
CG8042	3L:7963692-7968108	18.5781	30.8284	0.730658	0.0005	0.00305057	yes	1.65939
CG8170	2R:4905359-4918546	7.35572	12.4755	0.762161	5e-05	0.000385856	yes	1.69603
CG8180	2R:11359969-11370338	12.4662	21.7927	0.805818	5e-05	0.000385856	yes	1.74814
CG8420	3R:5073172-5077160	14.7806	144.8	3.29229	5e-05	0.000385856	yes	9.79663
CG8483	3R:9034469-9040187	27.5927	61.0912	1.14668	5e-05	0.000385856	yes	2.21403
CG8498	2L:8159839-8162389	143.108	290.072	1.01931	5e-05	0.000385856	yes	2.02694
CG8501	2R:8271124-8272025	10.12	46.4099	2.19722	5e-05	0.000385856	yes	4.58596
CG8507	3R:5617191-5618840	40.0474	76.3706	0.93131	5e-05	0.000385856	yes	1.90701
CG8552	2L:8134246-8159575	12.1432	22.1761	0.868851	5e-05	0.000385856	yes	1.82622
CG8668	2L:8127023-8133989	17.4072	29.425	0.757357	5e-05	0.000385856	yes	1.69039
CG8776	2R:8547001-8557722	6.70247	17.7689	1.40659	5e-05	0.000385856	yes	2.6511
CG8788	2R:5025978-5029486	9.00965	17.0945	0.923992	0.00025	0.00166137	yes	1.89735
CG8860	2R:8066987-8067392	620.955	1188.59	0.936686	5e-05	0.000385856	yes	1.91413
CG9005	2R:7506983-7520075	7.98706	13.0902	0.71275	5e-05	0.000385856	yes	1.63893
CG9095	X:15033961-15057255	3.01569	18.7946	2.63976	5e-05	0.000385856	yes	6.23227
CG9175	2L:6096694-6098964	24.8883	42.5498	0.773686	5e-05	0.000385856	yes	1.70963
CG9186	3L:1305274-1313377	52.2503	127.053	1.28192	5e-05	0.000385856	yes	2.43162
CG9238	3L:14534632-14544071	3.53036	20.5814	2.54345	5e-05	0.000385856	yes	5.82983
CG9302	2L:13376448-13378546	88.5452	136.082	0.61999	5e-05	0.000385856	yes	1.53686
CG9312	3R:9591496-9592829	6.21986	14.998	1.26982	0.00075	0.00436447	yes	2.41131
CG9362	3R:5281233-5282264	13.1162	21.4977	0.712835	0.00065	0.00383464	yes	1.63902
CG9363	3R:5283368-5286362	7.66281	14.628	0.932787	0.0024	0.0118288	yes	1.90896
CG9416	2R:15251149-15260747	19.4834	74.5176	1.93534	5e-05	0.000385856	yes	3.82467
CG9427	3R:5450874-5452187	51.246	108.851	1.08684	5e-05	0.000385856	yes	2.12409
CG9449	3L:19485372-19489812	3.40876	10.199	1.5811	5e-05	0.000385856	yes	2.992
CG9452	3L:19494109-19496970	0.242042	11.6914	5.59404	0.00035	0.00223239	yes	48.3032
CG9503	X:14733410-14827616	10.9875	19.0201	0.791664	0.00985	0.0378703	yes	1.73107
CG9590	3R:11612422-11614063	22.2407	38.7711	0.801777	5e-05	0.000385856	yes	1.74325
CG9628	3L:14615909-14625173	95.0902	183.326	0.947041	5e-05	0.000385856	yes	1.92792
CG9629	3L:19255616-19262009	5.84864	12.7921	1.12908	0.0098	0.0377459	yes	2.18719
CG9650	X:7087108-7134453	3.39052	6.56852	0.954061	5e-05	0.000385856	yes	1.93732
CG9686	X:9773901-9774568	5.2792	18.5314	1.81158	5e-05	0.000385856	yes	3.51027
CG9689	X:9776015-9776992	54.1127	116.253	1.10322	5e-05	0.000385856	yes	2.14835
CG9801	3R:4561600-4573372	9.12583	18.3898	1.01088	5e-05	0.000385856	yes	2.01514
CG9812	2R:19299858-19307207	8.58469	62.3144	2.85973	5e-05	0.000385856	yes	7.25878
CG9815	2R:19309030-19313420	2.1429	12.5369	2.54854	0.00275	0.0131821	yes	5.85044
CG9895	2R:18899289-18929143	4.62551	9.43048	1.02772	0.0046	0.0202277	yes	2.0388
CG9973	3L:2848575-2871710	4.85202	24.5266	2.33769	5e-05	0.000385856	yes	5.05493
CHKov1	3R:21148875-21155024	86.0794	307.473	1.83672	5e-05	0.000385856	yes	3.57197
CHKov2	3R:21155251-21156924	6.57795	15.4604	1.23286	5e-05	0.000385856	yes	2.35034
CHOp24	X:4434942-4436471	111.08	192.245	0.791348	5e-05	0.000385856	yes	1.73069
chrb	3L:11480659-11490429	15.2966	35.1828	1.20166	5e-05	0.000385856	yes	2.30004
Cht3	2L:22892289-22918647	146.251	251.409	0.781593	5e-05	0.000385856	yes	1.71902
Cht5	3R:9593272-9596454	7.83823	41.8282	2.41588	5e-05	0.000385856	yes	5.33643
cib	X:4000147-4005014	747.934	1255.23	0.746964	5e-05	0.000385856	yes	1.67826
ck	2L:15044962-15057848	19.0094	38.0594	1.00154	5e-05	0.000385856	yes	2.00214
Cog3	2L:3453696-3457058	13.5295	20.5398	0.602314	0.0002	0.00137166	yes	1.51815
Cog7	3R:25756272-25758779	17.3541	34.0329	0.971656	5e-05	0.000385856	yes	1.96109
colt	2L:2767280-2770066	65.0155	113.153	0.799424	5e-05	0.000385856	yes	1.7404
Cp1	2R:9848163-9855486	229.883	409.842	0.834166	5e-05	0.000385856	yes	1.78283
Cpr49Ac	2R:8274471-8277562	123.789	312.39	1.33546	5e-05	0.000385856	yes	2.52357
CPTI	2R:6356123-6366073	33.9842	67.6767	0.993795	5e-05	0.000385856	yes	1.99142
CR18854	2L:9782389-9791958	222.566	338.377	0.604399	5e-05	0.000385856	yes	1.52034
CR32028	3L:8433160-8435480	4.72265	9.4526	1.00112	5e-05	0.000385856	yes	2.00155
Crc	3R:5454659-5456607	1178.19	2291.33	0.959615	5e-05	0.000385856	yes	1.94479
CrebA	3L:15528513-15546314	14.1757	49.0309	1.79027	5e-05	0.000385856	yes	3.4588
CRMP	3R:1396829-1404913	4.70133	13.5962	1.53207	5e-05	0.000385856	yes	2.89199
ct	X:7503180-7570056	3.01542	5.12633	0.765567	5e-05	0.000385856	yes	1.70004
Cyp18a1	X:18582569-18586778	0.67068	10.451	3.96187	5e-05	0.000385856	yes	15.5827
Cyp28d1	2L:5210460-5214730	0.717714	8.52127	3.56959	5e-05	0.000385856	yes	11.8728
Cyp4e2	2R:4332216-4334676	13.3925	20.7819	0.633897	0.0001	0.000742932	yes	1.55176
Cyp9b2	2R:3017781-3019640	1.17273	5.92451	2.33683	0.0003	0.0019424	yes	5.0519
Cys	3R:10394752-10395363	15.2827	131.352	3.10346	5e-05	0.000385856	yes	8.59482
Cyt-b5	2R:3421012-3427201	156.345	263.612	0.753686	5e-05	0.000385856	yes	1.68609
Dat	2R:20027107-20046819	0.451086	12.7343	4.81918	0.01185	0.0440569	yes	28.2303
daw	2L:2805517-2812147	4.42479	27.5103	2.63629	5e-05	0.000385856	yes	6.21731
deltaCOP	X:1753173-1755825	96.8686	165.413	0.771969	5e-05	0.000385856	yes	1.7076
Dip-B	3R:9608011-9611401	115.842	191.071	0.721954	5e-05	0.000385856	yes	1.64941
dlp	3L:14625719-14664716	38.8157	65.6239	0.757579	5e-05	0.000385856	yes	1.69065
DnaJ-1	3L:5743121-5745330	42.5839	69.1492	0.699404	5e-05	0.000385856	yes	1.62383
dp	2L:4479470-4591963	7.46657	11.5131	0.624763	5e-05	0.000385856	yes	1.54195
Dp1	2R:14299510-14308629	141.68	257.91	0.864236	5e-05	0.000385856	yes	1.82037
Dr	3R:25382108-25391007	6.75569	10.5547	0.643704	0.00085	0.00486379	yes	1.56234
Drip	2R:7299446-7317146	8.57263	13.1093	0.612784	0.0051	0.0219752	yes	1.5292
dro5	3L:3316808-3317144	3.11906	413.041	7.04903	0.0067	0.0274735	yes	132.425
Drs	3L:3369568-3369942	6.34876	25.6228	2.01288	0.00585	0.0245522	yes	4.03587
dsd	3R:23423482-23433081	9.75744	14.7379	0.594958	5e-05	0.000385856	yes	1.51043
dy	X:11663805-11672709	3.06482	13.4068	2.12909	5e-05	0.000385856	yes	4.37442
e	3R:17055551-17062900	0.210598	40.6245	7.59172	5e-05	0.000385856	yes	192.901
E23	2L:3334870-3355000	2.05271	20.1407	3.29451	5e-05	0.000385856	yes	9.81176
eca	3R:5510190-5511253	96.3783	203.991	1.08173	5e-05	0.000385856	yes	2.11657
ect	3L:10183375-10194934	1.83688	5.65178	1.62145	0.00045	0.00277317	yes	3.07684
Ect3	3R:7819896-7831194	3.96708	100.846	4.66792	5e-05	0.000385856	yes	25.4207
EDTP	2R:13318555-13332443	16.2283	25.5745	0.656196	5e-05	0.000385856	yes	1.57592
Ef1alpha100E	3R:27564189-27569028	6.18596	30.0857	2.28201	5e-05	0.000385856	yes	4.86355
egr	2R:5965869-5971715	8.64894	16.4518	0.927653	5e-05	0.000385856	yes	1.90218
Eig71Ea	3L:15642219-15642755	2.39261	722.438	8.23814	5e-05	0.000385856	yes	301.946
Eig71Ec	3L:15644578-15645352	1.72699	335.55	7.60213	5e-05	0.000385856	yes	194.298
Eig71Ed	3L:15645643-15646196	1.57939	457.533	8.17836	5e-05	0.000385856	yes	289.69
Eig71Ee	3L:15647571-15649110	5.42403	29.1515	2.42613	5e-05	0.000385856	yes	5.37451
Eig71Ef	3L:15649754-15650501	0.847267	274.198	8.33819	0.0003	0.0019424	yes	323.626
Eig71Eg	3L:15650727-15651258	1.03176	336.966	8.35135	0.0084	0.0333277	yes	326.593
Eip78C	3L:21220018-21257721	11.7436	43.1086	1.87611	5e-05	0.000385856	yes	3.67082
Epac	2R:2649416-2684421	1.86393	5.75311	1.62599	5e-05	0.000385856	yes	3.08655
epsilonCOP	2L:6489091-6490828	101.227	193.032	0.931235	5e-05	0.000385856	yes	1.90692
ergic53	3L:8528051-8531118	109.423	242.107	1.14573	5e-05	0.000385856	yes	2.21258
Ero1L	3L:4170265-4173789	9.83961	23.3219	1.24502	5e-05	0.000385856	yes	2.37021
ERp60	2R:7773571-7778520	853.269	1433.47	0.748435	5e-05	0.000385856	yes	1.67997
esg	2L:15333863-15336150	23.1354	34.886	0.59255	5e-05	0.000385856	yes	1.50791
Fas2	X:4028404-4100123	70.3016	114.553	0.704382	5e-05	0.000385856	yes	1.62945
fat-spondin	2R:12941507-12946810	3.59389	14.5412	2.01653	5e-05	0.000385856	yes	4.04609
Fbp1	3L:14087685-14091156	57.258	691.157	3.59346	5e-05	0.000385856	yes	12.0709
Fbp2	2L:9426859-9427835	31.5587	234.685	2.89462	5e-05	0.000385856	yes	7.43646
Fkbp13	2R:17374669-17385431	117.056	458.496	1.9697	5e-05	0.000385856	yes	3.91689
fok	2L:20075756-20091220	10.8802	22.1734	1.02713	5e-05	0.000385856	yes	2.03796
form3	3L:7087917-7118623	6.00857	10.0895	0.747764	0.00105	0.00585185	yes	1.67918
fra	2R:8416560-8451691	28.096	62.4372	1.15204	5e-05	0.000385856	yes	2.22228
Fs	2R:11105885-11129084	5.19258	9.05579	0.802388	0.00215	0.0107701	yes	1.74399
Gal	2L:6000230-6006791	4.2336	24.3308	2.52283	5e-05	0.000385856	yes	5.74707
GalNAc-T2	X:18389208-18393902	44.4616	87.656	0.979294	5e-05	0.000385856	yes	1.9715
gammaCop	3R:27397864-27401429	80.4178	133.025	0.726107	5e-05	0.000385856	yes	1.65417
Gap69C	3L:12408125-12410803	37.0286	67.9713	0.876285	5e-05	0.000385856	yes	1.83564
garz	2R:8214178-8221327	19.2056	32.9667	0.779482	5e-05	0.000385856	yes	1.71651
Gasp	3R:1914950-1926609	56.7701	123.282	1.11876	5e-05	0.000385856	yes	2.1716
Gef64C	3L:4692783-4796249	3.45851	9.78824	1.5009	5e-05	0.000385856	yes	2.83019
gk	3L:18132503-18138520	7.97349	19.6599	1.30197	5e-05	0.000385856	yes	2.46566
glec	3R:17676626-17681984	23.8298	41.6487	0.805504	5e-05	0.000385856	yes	1.74776
Glt	2L:8672042-8676811	8.34512	18.3439	1.1363	5e-05	0.000385856	yes	2.19816
Glut1	3L:914073-985461	10.6906	21.2104	0.988431	5e-05	0.000385856	yes	1.98402
GM130	2R:18012074-18015002	14.423	28.7827	0.996829	5e-05	0.000385856	yes	1.99561
Gp93	3R:23774379-23779834	423.7	850.466	1.00521	5e-05	0.000385856	yes	2.00724
Grasp65	3L:19918160-19919979	113.22	269.577	1.25157	5e-05	0.000385856	yes	2.381
grass	3R:22983667-22985505	3.58553	10.1936	1.5074	0.0016	0.0083929	yes	2.84298
grh	2R:13690293-13729118	62.0281	108.643	0.808602	5e-05	0.000385856	yes	1.75151
Gs1	2L:132059-134472	5.64417	32.7631	2.53724	5e-05	0.000385856	yes	5.80477
Gtp-bp	X:11020907-11023136	116.513	208.509	0.839617	5e-05	0.000385856	yes	1.78958
GV1	3L:1810588-1822903	34.536	67.9815	0.977041	5e-05	0.000385856	yes	1.96842
heix	2L:16296048-16299875	12.1938	20.804	0.770715	5e-05	0.000385856	yes	1.70611
Him	X:18103463-18104774	6.65136	15.6136	1.23108	0.001	0.00561337	yes	2.34743
hipk	3L:543069-576065	26.6482	41.9871	0.655907	5e-05	0.000385856	yes	1.57561
HLHm7	3R:21862759-21863741	84.0741	152.187	0.856115	5e-05	0.000385856	yes	1.81015
HLHmgamma	3R:21825579-21826421	19.7062	48.8239	1.30894	5e-05	0.000385856	yes	2.47759
Hmu	3R:23114492-23117911	170.977	269.011	0.653862	5e-05	0.000385856	yes	1.57338
Hr39	2L:21237236-21259675	24.1488	44.6757	0.88754	5e-05	0.000385856	yes	1.85002
Hr46	2R:6092958-6124853	0.161202	80.6935	8.96744	5e-05	0.000385856	yes	500.574
Hsc70-3	X:11695728-11701212	281.513	884.056	1.65093	5e-05	0.000385856	yes	3.14037
Hsp22	3L:9365821-9368064	5.47759	17.2552	1.65542	0.0003	0.0019424	yes	3.15014
Hsp26	3L:9369517-9370527	194.862	967.931	2.31245	5e-05	0.000385856	yes	4.96726
Hsp27	3L:9377164-9378384	1138	2359.24	1.05183	5e-05	0.000385856	yes	2.07315
Hsp67Ba	3L:9370901-9372634	143.926	532.339	1.88701	5e-05	0.000385856	yes	3.6987
Hsp67Bc	3L:9364610-9365583	5.67756	134.694	4.56827	5e-05	0.000385856	yes	23.7239
Ilp6	X:2225525-2227719	1.70645	5.78972	1.7625	0.0006	0.0035816	yes	3.39284
Imp	X:10690029-10716815	8.076	12.8975	0.675379	5e-05	0.000385856	yes	1.59702
ImpE1	3L:8365508-8384281	75.8019	394.807	2.38084	5e-05	0.000385856	yes	5.20841
ImpE2	3L:3510973-3512677	1130.44	4804.48	2.08749	5e-05	0.000385856	yes	4.2501
ImpE3	3R:3839545-3856505	23.1028	181.491	2.97376	5e-05	0.000385856	yes	7.8558
ImpL1	3L:13375856-13377099	2.49343	180.212	6.17542	5e-05	0.000385856	yes	72.2747
ImpL3	3L:6252591-6255793	14.3326	65.8541	2.19998	5e-05	0.000385856	yes	4.59471
Indy	3L:18821731-18839360	30.8903	65.4453	1.08314	5e-05	0.000385856	yes	2.11864
IP3K2	X:13212684-13223350	4.97227	8.56507	0.78456	0.00125	0.00677261	yes	1.72257
Itp-r83A	3R:1334543-1364584	16.0807	26.7034	0.731694	5e-05	0.000385856	yes	1.66059
jar	3R:20078547-20096953	89.796	152.589	0.764928	5e-05	0.000385856	yes	1.69929
Jupiter	3R:7416107-7445656	274.788	464.659	0.757857	5e-05	0.000385856	yes	1.69097
kar	3R:8507907-8515089	2.98212	7.06627	1.24461	0.00245	0.0120337	yes	2.36955
KdelR	2L:10426866-10428159	216.747	360.955	0.735805	5e-05	0.000385856	yes	1.66533
kermit	2R:4024823-4044128	23.3126	36.5688	0.649502	0.00095	0.00537497	yes	1.56863
kni	3L:20685429-20688463	8.67763	19.4448	1.16401	5e-05	0.000385856	yes	2.2408
knk	3R:5948086-5951383	29.4895	49.2172	0.73896	5e-05	0.000385856	yes	1.66897
knrl	3L:20590240-20613636	1.53231	5.48776	1.84051	5e-05	0.000385856	yes	3.58136
l(1)G0320	X:9445637-9447703	533.442	1207.75	1.17892	5e-05	0.000385856	yes	2.26407
l(1)G0469	X:14095404-14119917	4.5563	12.1848	1.41915	0.0033	0.0152799	yes	2.67428
lectin-28C	2L:7857089-7857931	2.38937	5.24724	1.13493	0.00535	0.0228001	yes	2.19608
Lerp	3R:22668183-22688843	6.06162	10.8369	0.83818	5e-05	0.000385856	yes	1.78779
LKR	2L:7791405-7795958	3.22492	7.95569	1.30272	5e-05	0.000385856	yes	2.46694
loj	3L:6088092-6089617	87.1326	161.694	0.891982	5e-05	0.000385856	yes	1.85572
lola	2R:6369711-6430767	139.55	224.457	0.685651	5e-05	0.000385856	yes	1.60843
Lsp2	3L:12122492-12124796	73.8543	191.357	1.37351	5e-05	0.000385856	yes	2.59101
ltd	2R:5065368-5073866	3.4541	9.05526	1.39045	5e-05	0.000385856	yes	2.6216
lva	X:3849577-3858787	18.0365	31.0206	0.78231	5e-05	0.000385856	yes	1.71988
m	X:11648305-11663548	4.97891	48.7859	3.29256	5e-05	0.000385856	yes	9.79851
m2	3R:21842235-21843192	101.452	188.324	0.89242	5e-05	0.000385856	yes	1.85629
m4	3R:21849547-21850280	82.7489	129.803	0.649513	5e-05	0.000385856	yes	1.56864
m6	3R:21858632-21859769	4.92804	14.5843	1.56533	5e-05	0.000385856	yes	2.95945
malpha	3R:21836614-21837290	285.504	546.49	0.936683	5e-05	0.000385856	yes	1.91412
mam	2R:9878685-9947861	14.372	23.956	0.737122	5e-05	0.000385856	yes	1.66685
Manf	3R:12175087-12176523	159.922	399.054	1.31921	5e-05	0.000385856	yes	2.4953
mas	3L:4161653-4167461	27.4352	92.5456	1.75414	5e-05	0.000385856	yes	3.37324
Mdr49	2R:8824399-8833850	11.0289	20.5929	0.900857	0.0002	0.00137166	yes	1.86718
Mec2	X:19082067-19084226	2.26179	14.6052	2.69094	0.00015	0.00106015	yes	6.45736
membrin	3L:5359584-5361108	19.1793	37.1858	0.955201	0.0023	0.0113883	yes	1.93885
MESR6	3L:19085771-19087860	27.1643	50.3265	0.889605	5e-05	0.000385856	yes	1.85267
mfas	3R:7810583-7819037	64.7253	139.261	1.10539	5e-05	0.000385856	yes	2.15157
mira	3R:15755435-15834244	2.51673	5.79056	1.20215	0.00405	0.0182112	yes	2.30083
Mmp1	2R:20556900-20575704	14.2566	32.4681	1.18739	5e-05	0.000385856	yes	2.27741
Mmp2	2R:5498643-5571356	5.99436	23.034	1.94209	5e-05	0.000385856	yes	3.84261
mmy	2L:6468537-6473919	21.8164	36.3872	0.738014	5e-05	0.000385856	yes	1.66788
Mnt	X:3565833-3594813	9.30338	23.9045	1.36146	5e-05	0.000385856	yes	2.56944
mwh	3L:1208424-1232701	2.74767	6.15603	1.16379	0.00015	0.00106015	yes	2.24045
Myo10A	X:10832481-10858079	37.4594	113.256	1.59618	5e-05	0.000385856	yes	3.02343
Myo61F	3L:1318481-1329623	26.8319	45.174	0.751541	5e-05	0.000385856	yes	1.68359
MYPT-75D	3L:18619060-18660277	8.44903	13.2029	0.643999	5e-05	0.000385856	yes	1.56265
Nep2	3R:545518-557595	50.0619	82.0147	0.712168	5e-05	0.000385856	yes	1.63827
Neu3	3R:10491558-10523057	10.7744	17.4387	0.69469	5e-05	0.000385856	yes	1.61853
NFAT	X:13518789-13557690	13.9384	28.9635	1.05517	5e-05	0.000385856	yes	2.07796
Nhe2	2L:21104598-21132685	3.68705	6.45783	0.808583	0.0001	0.000742932	yes	1.75149
nimC2	2L:13980145-14001252	0.570474	5.36505	3.23336	0.0046	0.0202277	yes	9.40455
nkd	3L:18996831-19038431	34.4137	55.6355	0.693021	5e-05	0.000385856	yes	1.61667
NLaz	2L:1359982-1361732	1.48099	26.0697	4.13774	5e-05	0.000385856	yes	17.6029
nmo	3L:7972148-8043433	34.0316	65.0118	0.93383	5e-05	0.000385856	yes	1.91034
Npc2a	2L:1988291-1988940	36.7886	66.7096	0.858634	5e-05	0.000385856	yes	1.81332
Nrt	3L:16759173-16772844	28.4141	46.0104	0.695351	5e-05	0.000385856	yes	1.61928
NUCB1	3L:17791159-17795353	72.7513	151.612	1.05934	5e-05	0.000385856	yes	2.08398
Oat	3L:19640375-19642949	3.42301	16.8647	2.30067	5e-05	0.000385856	yes	4.92686
Oatp30B	2L:9521213-9540060	8.54586	23.4089	1.45376	5e-05	0.000385856	yes	2.73921
Oatp74D	3L:17480222-17504793	44.5248	76.6975	0.78457	5e-05	0.000385856	yes	1.72258
Obp83ef	3R:1933855-1936740	0.625926	8.2795	3.72548	0.00585	0.0245522	yes	13.2276
Obp83g	3R:1937391-1938019	24.1286	44.3667	0.878734	0.0094	0.0365006	yes	1.83876
Obp99b	3R:25541972-25542532	265.001	978.428	1.88447	5e-05	0.000385856	yes	3.69217
Obp99c	3R:25508223-25512504	13.5086	71.3364	2.40076	5e-05	0.000385856	yes	5.28081
ogre	X:6868048-6875731	197.856	393.34	0.991326	5e-05	0.000385856	yes	1.98801
olf413	3L:22129215-22235892	44.9345	70.1286	0.642178	5e-05	0.000385856	yes	1.56068
Osi14	3R:2124853-2126472	1.96501	6.51933	1.73019	0.0042	0.0187577	yes	3.31771
Osi7	3R:2074713-2077405	0.123271	11.8118	6.58225	0.0003	0.0019424	yes	95.8198
OstStt3	3R:20891525-20895372	201.106	307.772	0.613905	5e-05	0.000385856	yes	1.5304
p115	X:7788069-7790819	35.0776	53.7305	0.615193	5e-05	0.000385856	yes	1.53176
p24-1	X:11745363-11746548	80.9615	153.495	0.922883	5e-05	0.000385856	yes	1.8959
P58IPK	3R:5412660-5416709	44.4582	84.8558	0.932564	5e-05	0.000385856	yes	1.90866
pain	2R:20809027-20815794	19.0609	35.9346	0.914759	5e-05	0.000385856	yes	1.88525
Papss	3L:19838396-19854025	40.0813	62.3469	0.63739	5e-05	0.000385856	yes	1.55551
Past1	3R:8520867-8529871	62.8096	107.71	0.778093	5e-05	0.000385856	yes	1.71487
Pde11	2L:18532727-18571648	9.8894	16.0318	0.696984	5e-05	0.000385856	yes	1.62111
Pde1c	2L:11814825-11928570	2.08639	11.635	2.4794	5e-05	0.000385856	yes	5.57662
Pde9	X:12685496-12725669	6.68885	11.3439	0.762083	5e-05	0.000385856	yes	1.69594
Pdi	3L:15130429-15135745	499.067	1321.79	1.40519	5e-05	0.000385856	yes	2.64852
Pgant35A	2L:14359217-14361443	21.4342	34.0534	0.667886	5e-05	0.000385856	yes	1.58874
pgant6	3L:2782271-2786010	18.2143	38.1814	1.0678	5e-05	0.000385856	yes	2.09623
Pglym78	3R:24973969-24977512	160.491	303.948	0.921335	5e-05	0.000385856	yes	1.89386
PGRP-LC	3L:9331909-9341436	4.17434	15.3288	1.87662	5e-05	0.000385856	yes	3.67215
PGRP-SB2	3L:16719640-16720388	3.83843	806.544	7.71509	5e-05	0.000385856	yes	210.123
PH4alphaEFB	3R:26291773-26311521	18.8163	32.659	0.795495	5e-05	0.000385856	yes	1.73568
phyl	2R:10314840-10319840	3.15852	7.16128	1.18097	0.00015	0.00106015	yes	2.26729
Pif1B	3R:4600007-4626898	29.4018	47.7346	0.699133	5e-05	0.000385856	yes	1.62353
pio	2R:20468771-20485385	235.719	534.685	1.18162	5e-05	0.000385856	yes	2.26832
Pka-C3	3L:15918903-15947897	2.44525	5.18584	1.08459	5e-05	0.000385856	yes	2.12078
PKD	3R:14128997-14140129	47.9785	84.2166	0.811717	5e-05	0.000385856	yes	1.7553
ple	3L:6706454-6712624	1.95575	22.0234	3.49324	5e-05	0.000385856	yes	11.2608
pncr002:3R	3R:2525273-2525886	52.2396	540.548	3.37121	5e-05	0.000385856	yes	10.3475
pncr015:3L	3L:7399422-7399719	0	19.6095	Inf	5e-05	0.000385856	yes	Inf
Ppn	3R:24346386-24366053	85.5701	159.007	0.893915	5e-05	0.000385856	yes	1.85821
PQBP-1	3R:4204892-4303315	1.9254	5.1051	1.40678	5e-05	0.000385856	yes	2.65145
Prosap	2R:9948983-10028403	18.3215	27.6138	0.591852	5e-05	0.000385856	yes	1.50718
pum	3R:4895478-5063417	23.7191	44.494	0.907563	5e-05	0.000385856	yes	1.87587
Pvf1	X:18726735-18736934	3.06445	7.34373	1.26089	0.00015	0.00106015	yes	2.39643
Pvf2	2L:7069577-7084634	8.03565	16.634	1.04965	5e-05	0.000385856	yes	2.07003
Pvr	2L:8220979-8239875	10.6438	30.5733	1.52226	5e-05	0.000385856	yes	2.8724
Rab5	2L:2359545-2370114	70.473	111.813	0.66594	5e-05	0.000385856	yes	1.58661
Rab6	2L:12107286-12109124	53.6113	100.34	0.904286	5e-05	0.000385856	yes	1.87162
Rac2	3L:7426991-7428279	47.3655	73.4783	0.633481	5e-05	0.000385856	yes	1.5513
rdo	2L:18012406-18070249	23.0114	39.2229	0.769348	5e-05	0.000385856	yes	1.7045
Reg-2	3L:605164-606569	3.96207	9.43989	1.25252	0.00655	0.0269747	yes	2.38257
Reg-5	2R:20675525-20680929	39.7402	183.884	2.21012	5e-05	0.000385856	yes	4.62715
regucalcin	X:11906466-11911091	99.0575	216.098	1.12535	5e-05	0.000385856	yes	2.18154
Rfabg	4:1085537-1096830	0.964599	5.65421	2.55132	5e-05	0.000385856	yes	5.86172
rpr	3L:18390652-18391503	5.79141	10.7846	0.896985	0.00125	0.00677261	yes	1.86217
rt	3L:11577216-11580868	9.3611	54.5885	2.54385	5e-05	0.000385856	yes	5.83142
Sans	2R:8824399-8833850	41.3998	72.0148	0.798671	5e-05	0.000385856	yes	1.7395
santa-maria	2L:7445344-7451165	0.909919	7.42392	3.02837	5e-05	0.000385856	yes	8.15888
sar1	3R:18182396-18186440	125.228	203.67	0.701672	5e-05	0.000385856	yes	1.62639
Sb	3R:11954450-11971006	6.30085	32.5679	2.36983	5e-05	0.000385856	yes	5.16881
sba	3R:19719888-19748695	7.78227	13.4337	0.787599	5e-05	0.000385856	yes	1.72619
sca	2R:8668048-8689515	25.405	47.5951	0.905701	5e-05	0.000385856	yes	1.87345
scarface	2R:1564253-1579200	10.7171	19.4528	0.860057	5e-05	0.000385856	yes	1.81512
scb	2R:11136289-11146003	13.6835	30.4049	1.15186	5e-05	0.000385856	yes	2.22201
scf	3L:1298617-1300389	51.6187	81.9334	0.666557	5e-05	0.000385856	yes	1.58728
Sclp	X:11815679-11818695	6.28291	16.5342	1.39595	5e-05	0.000385856	yes	2.63161
scyl	3L:11245409-11248343	95.9632	168.664	0.813598	5e-05	0.000385856	yes	1.75759
sdt	X:8072581-8133487	21.8776	36.4446	0.736248	5e-05	0.000385856	yes	1.66584
Sec16	X:12490105-12505632	20.2695	36.7894	0.859979	5e-05	0.000385856	yes	1.81501
Sec22	X:700104-702235	44.428	99.7537	1.1669	5e-05	0.000385856	yes	2.24529
sec23	3R:1474786-1478354	137.27	232.203	0.75837	5e-05	0.000385856	yes	1.69158
sec31	2R:4781128-4787706	69.7225	123.278	0.822216	5e-05	0.000385856	yes	1.76812
Sec61alpha	2L:6477181-6480489	573.932	1089.95	0.925314	5e-05	0.000385856	yes	1.89909
Sec61beta	2R:10506231-10507189	503.305	1096.98	1.12403	5e-05	0.000385856	yes	2.17955
Sec61gamma	X:19537364-19538528	265.443	519.391	0.968417	5e-05	0.000385856	yes	1.9567
sec63	3L:7353662-7357466	91.0407	146.927	0.690518	5e-05	0.000385856	yes	1.61386
serp	3L:19694076-19701109	102.253	196.721	0.944003	5e-05	0.000385856	yes	1.92387
shep	3L:5153785-5271044	11.9832	18.533	0.629084	5e-05	0.000385856	yes	1.54658
side	3R:23202303-23244247	3.49631	8.11954	1.21557	5e-05	0.000385856	yes	2.32232
Slh	2L:2490204-2492666	40.1467	68.8155	0.777451	5e-05	0.000385856	yes	1.7141
sm	2R:15417413-15519007	1.40426	57.704	5.36079	5e-05	0.000385856	yes	41.0921
smi35A	2L:14184477-14234108	23.7496	48.1922	1.02089	5e-05	0.000385856	yes	2.02918
Smr	X:12580030-12636476	15.9609	24.7009	0.63002	5e-05	0.000385856	yes	1.54759
sn	X:7850852-7880118	84.5571	136.765	0.693696	5e-05	0.000385856	yes	1.61743
Snap24	3R:5587687-5588636	32.6554	67.2731	1.04271	5e-05	0.000385856	yes	2.06009
sog	X:15498602-15520573	19.7487	36.1782	0.873364	5e-05	0.000385856	yes	1.83193
Sox15	2R:10088887-10099914	4.64478	7.05422	0.602876	0.0005	0.00305057	yes	1.51874
SoxN	2L:8825624-8829670	1.50393	7.4588	2.3102	5e-05	0.000385856	yes	4.95954
SP1029	3R:25070679-25076167	40.9233	191.787	2.22851	5e-05	0.000385856	yes	4.6865
Sp7	3R:3585507-3589148	3.22058	6.59058	1.03308	0.00325	0.0150892	yes	2.0464
SP71	X:72457-96056	51.2216	121.257	1.24325	5e-05	0.000385856	yes	2.3673
Spase12	3R:25315192-25317105	241.467	422.142	0.8059	5e-05	0.000385856	yes	1.74824
Spase18-21	3R:2483603-2485822	324.94	561.966	0.79031	5e-05	0.000385856	yes	1.72945
Spase22-23	3R:20055027-20055751	380.366	699.666	0.879277	5e-05	0.000385856	yes	1.83945
Spase25	X:11379284-11380302	223.975	447.142	0.997395	5e-05	0.000385856	yes	1.99639
Spec2	3R:1442367-1449844	10.7454	18.6148	0.792732	5e-05	0.000385856	yes	1.73235
spirit	X:8465131-8467614	27.3752	99.4383	1.86093	5e-05	0.000385856	yes	3.63242
Spn	3L:2508119-2554277	4.60444	15.4427	1.74583	5e-05	0.000385856	yes	3.35387
Spn43Aa	2R:3035202-3036757	276.737	1198.81	2.11502	5e-05	0.000385856	yes	4.33195
Spp	2L:542775-544627	126.531	318.238	1.33062	5e-05	0.000385856	yes	2.5151
spri	X:10384097-10479056	16.4926	41.1182	1.31796	5e-05	0.000385856	yes	2.49313
spz2	3L:4501651-4508429	11.3776	27.8476	1.29136	5e-05	0.000385856	yes	2.44758
spz6	2R:20644902-20647989	41.5719	108.406	1.38276	5e-05	0.000385856	yes	2.60767
sr	3R:13916524-13959471	2.84065	7.14643	1.331	5e-05	0.000385856	yes	2.51577
Srp54k	3L:5145668-5147877	90.5179	160.065	0.822383	5e-05	0.000385856	yes	1.76832
Srp68	3L:8968147-8972980	73.7112	115.037	0.642139	5e-05	0.000385856	yes	1.56064
Srp72	3R:16414436-16418393	59.0673	105.707	0.839642	5e-05	0.000385856	yes	1.7896
SrpRbeta	3L:8712197-8713317	73.9119	125.03	0.758391	5e-05	0.000385856	yes	1.69161
SsRbeta	3L:16122739-16124086	453.83	1093.5	1.26873	5e-05	0.000385856	yes	2.40949
Sulf1	3R:12136255-12140853	16.5013	32.3777	0.972418	5e-05	0.000385856	yes	1.96213
svp	3R:8084470-8128509	5.30126	13.1555	1.31126	5e-05	0.000385856	yes	2.48158
Syx18	3R:20411384-20451302	33.15	54.6761	0.721902	0.0041	0.0183974	yes	1.64935
T48	3R:22707455-22738608	17.6099	38.1477	1.11521	5e-05	0.000385856	yes	2.16626
Tango1	2L:6649429-6654574	37.1068	64.3858	0.795059	5e-05	0.000385856	yes	1.73515
Tango13	X:13457856-13484624	12.7418	19.8448	0.639198	5e-05	0.000385856	yes	1.55746
Tapdelta	2R:7257790-7258675	621.692	1242.09	0.9985	5e-05	0.000385856	yes	1.99792
TepII	2L:7693799-7701585	7.41798	33.7746	2.18684	5e-05	0.000385856	yes	4.55307
tinc	3R:13637265-13698229	13.0781	31.4956	1.268	5e-05	0.000385856	yes	2.40827
Tl	3R:22624764-22668125	14.8227	26.2965	0.827065	5e-05	0.000385856	yes	1.77407
tmod	3R:26358335-26404627	70.42	110.062	0.644254	5e-05	0.000385856	yes	1.56294
Tom	3L:14962446-14963417	213.302	363.36	0.768506	5e-05	0.000385856	yes	1.7035
TotA	3R:16696757-16697427	9.16993	31.8134	1.79465	5e-05	0.000385856	yes	3.46932
Tpi	3R:25958697-25960321	479.13	820.469	0.776032	5e-05	0.000385856	yes	1.71241
TRAM	X:829264-831855	188.282	534.506	1.50531	5e-05	0.000385856	yes	2.83886
trn	3L:13107372-13111188	48.0097	77.8126	0.696678	5e-05	0.000385856	yes	1.62077
Trp1	2L:10009385-10013171	52.54	90.9198	0.791178	5e-05	0.000385856	yes	1.73049
Tsp	2L:6684844-6709085	50.8327	83.0101	0.70753	5e-05	0.000385856	yes	1.63301
Tsp42Ea	2R:2880180-2891766	7.49958	25.0265	1.73857	0.00505	0.0218146	yes	3.33705
Tsp42Ej	2R:2927643-2930267	3.12463	33.1919	3.40908	5e-05	0.000385856	yes	10.6227
Tsp42Ek	2R:2930425-2932118	2.99492	8.71138	1.54038	0.00475	0.0207066	yes	2.90872
Tsp66E	3L:8899016-8925165	19.6785	49.9208	1.34302	5e-05	0.000385856	yes	2.53682
Tudor-SN	3L:259285-264378	310.197	500.648	0.690612	5e-05	0.000385856	yes	1.61397
tw	X:678823-684122	65.1953	105.632	0.696213	5e-05	0.000385856	yes	1.62024
TwdlE	2L:7857956-7860838	33.1678	85.5066	1.36625	5e-05	0.000385856	yes	2.578
Ugt	3L:18865846-18883582	50.7396	79.1116	0.640775	5e-05	0.000385856	yes	1.55917
UK114	2L:15274229-15275060	2.25511	7.58272	1.74952	0.01205	0.0445684	yes	3.36246
Unc-76	X:1974644-1987129	15.9407	30.3983	0.931277	5e-05	0.000385856	yes	1.90696
verm	3L:19683132-19688356	411.115	877.739	1.09425	5e-05	0.000385856	yes	2.13502
VhaM9.7-1	3L:4173852-4193788	16.0979	25.7255	0.676328	0.0015	0.00795604	yes	1.59807
wb	2L:14263521-14328262	6.32443	12.3225	0.962289	5e-05	0.000385856	yes	1.9484
wbl	2R:15137265-15138419	152.515	481.224	1.65776	5e-05	0.000385856	yes	3.15526
Wnt4	2L:7255459-7277168	5.97393	12.615	1.07838	5e-05	0.000385856	yes	2.11168
wol	2L:8301344-8302983	43.7707	73.5392	0.74855	5e-05	0.000385856	yes	1.6801
wun	2R:5288051-5300965	27.498	50.9679	0.890265	5e-05	0.000385856	yes	1.85351
wun2	2R:5301848-5305353	10.9883	20.1232	0.872894	5e-05	0.000385856	yes	1.83133
wus	X:16832529-16834859	39.0811	62.2639	0.671923	5e-05	0.000385856	yes	1.5932
Xbp1	2R:17031049-17033255	128.471	344.357	1.42246	5e-05	0.000385856	yes	2.68043
yuri	2L:15256608-15264690	8.39877	13.3053	0.663754	0.0017	0.00884702	yes	1.5842
zetaCOP	3L:16664763-16666655	187.08	412.969	1.14238	5e-05	0.000385856	yes	2.20745
Zip3	3R:12131484-12134424	3.61737	10.462	1.53214	5e-05	0.000385856	yes	2.89216
18w	2R:15999015-16004437	54.0224	78.5959	0.540895	5e-05	0.000385856	no	1.45488
Aats-ala	2L:8378261-8381756	155.082	219.619	0.501967	5e-05	0.000385856	no	1.41615
Aats-tyr	3L:16410446-16412395	110.09	148.982	0.436459	0.0008	0.00462714	no	1.35327
Aats-val	2R:9086355-9090217	46.8443	63.2125	0.432337	0.00055	0.0033225	no	1.34942
Act42A	2R:1901326-1907660	1235.53	1540.34	0.318113	0.00685	0.0279548	no	1.2467
Aef1	3L:21426527-21430973	15.2256	20.4446	0.425217	0.0017	0.00884702	no	1.34278
ago	3L:4246325-4254309	47.281	60.4007	0.353303	0.0032	0.0149055	no	1.27748
AGO1	2R:9834046-9845594	51.1442	73.2823	0.518894	5e-05	0.000385856	no	1.43286
Alh	3R:2919759-2949907	43.0853	56.6208	0.394135	0.00595	0.0249353	no	1.31416
alpha-Est7	3R:3345284-3349476	0.837202	3.31304	1.98451	0.0019	0.00972246	no	3.95728
alphaTub84B	3R:2912259-2914582	5137.68	6999.22	0.446076	0.0003	0.0019424	no	1.36233
aop	2L:2155759-2178749	41.8765	53.5757	0.355439	0.0031	0.0145266	no	1.27937
Appl	X:425651-472172	1.97603	2.9029	0.554891	0.0052	0.022361	no	1.46906
aralar1	3R:26271360-26281589	18.0788	23.8963	0.402488	0.0053	0.0226999	no	1.32179
ari-2	2R:18100345-18104769	22.3282	28.311	0.342501	0.01235	0.0455403	no	1.26795
Arpc3B	X:16998603-16999885	0.349405	3.8248	3.45241	0.00275	0.0131821	no	10.9466
Asph	2R:11997989-12004499	0.73118	1.88503	1.36629	0.0027	0.013008	no	2.57807
Atet	2L:4333925-4345776	2.73042	4.25884	0.641335	0.0039	0.0176292	no	1.55977
Atg4	2L:1080912-1102506	32.7509	47.7193	0.543042	0.00015	0.00106015	no	1.45704
Atox1	3L:21634141-21635699	118.351	163.111	0.462781	0.0005	0.00305057	no	1.3782
Atx2	3R:11234157-11242999	38.1318	52.845	0.470771	0.00035	0.00223239	no	1.38585
bai	3R:20865096-20870857	142.463	202.563	0.507779	0.0001	0.000742932	no	1.42186
Bap	X:19625035-19628620	82.473	103.963	0.334078	0.007	0.0284585	no	1.26057
bbc	2R:9374171-9382374	34.1605	43.0728	0.334448	0.01175	0.0437611	no	1.26089
bchs	2L:5907179-5921242	2.06567	3.6773	0.83204	5e-05	0.000385856	no	1.7802
beat-IIa	3R:13145720-13191839	0.316377	3.42947	3.43827	5e-05	0.000385856	no	10.8398
beat-IIb	3R:13057974-13073598	1.14319	4.23612	1.88967	0.0006	0.0035816	no	3.70553
betaTub56D	2R:15334823-15339122	5042.62	6708.57	0.411832	0.0004	0.00250285	no	1.33037
bgm	2L:14013747-14020208	0.498349	4.45551	3.16036	0.00065	0.00383464	no	8.94054
bif	X:11573027-11588774	52.6327	64.6883	0.297546	0.0125	0.0458762	no	1.22905
bmm	3L:14769595-14779523	1.29356	2.88813	1.15879	0.0038	0.0172409	no	2.2327
bnl	3R:15619794-15662539	0.761764	1.56194	1.03592	0.00255	0.012418	no	2.05043
boss	3R:21787715-21792670	0.190297	1.48516	2.9643	0.00025	0.00166137	no	7.80443
bou	X:6880522-6881236	136.208	190.949	0.487376	0.0001	0.000742932	no	1.40189
br	X:1417932-1553962	201.804	300.437	0.574109	5e-05	0.000385856	no	1.48876
Brd	3L:14965768-14966301	138.008	179.043	0.375552	0.0124	0.0456657	no	1.29734
Bsg	2L:8083421-8110561	32.3798	41.7323	0.366071	0.00265	0.0128393	no	1.28884
btz	3R:23525985-23532468	32.8746	42.4286	0.368067	0.01195	0.0443517	no	1.29062
C1GalTA	2L:8943453-8951200	23.8005	32.9675	0.470054	0.003	0.0141431	no	1.38516
C901	X:10858239-10861165	0.302173	2.73646	3.17887	0.00385	0.0174308	no	9.05594
Cad99C	3R:25667378-25683191	44.2349	55.2332	0.320352	0.0135	0.0488143	no	1.24863
cals	4:1135803-1144024	47.9016	65.6655	0.455062	0.0001	0.000742932	no	1.37084
Camta	2R:5333550-5365595	5.54798	7.40561	0.416655	0.0054	0.022956	no	1.33483
capt	2L:1150782-1158264	260.47	369.68	0.50516	5e-05	0.000385856	no	1.41928
cathD	2R:3709614-3711073	389.272	508.886	0.386563	0.00125	0.00677261	no	1.30728
cbt	2L:476436-479682	13.2278	17.281	0.385617	0.01195	0.0443517	no	1.30642
Ccp84Af	3R:2515323-2515961	0	1.93053	Inf	5e-05	0.000385856	no	Inf
Ccp84Ag	3R:2512449-2513761	0	0.942279	Inf	5e-05	0.000385856	no	Inf
cdc14	2L:7802414-7810697	9.97936	14.839	0.572372	0.00025	0.00166137	no	1.48697
Cdep	3R:736277-771298	36.0001	48.3029	0.424107	0.00105	0.00585185	no	1.34174
ced-6	2R:5322173-5329065	32.5249	43.2808	0.41218	0.00215	0.0107701	no	1.3307
CG10005	3R:7800877-7802912	58.5897	78.4374	0.420895	0.00245	0.0120337	no	1.33876
CG10166	2L:19518786-19526347	79.8966	108.584	0.442602	0.0012	0.00656818	no	1.35906
CG10359	3L:3612193-3615245	24.7295	32.1438	0.378307	0.011	0.041491	no	1.29982
CG10413	2L:18599748-18605021	26.139	37.3259	0.513971	5e-05	0.000385856	no	1.42798
CG10440	2R:17447750-17458957	106.095	131.591	0.310703	0.01095	0.0413206	no	1.24031
CG10590	3L:5594195-5597075	37.6855	47.1424	0.323014	0.0136	0.0491344	no	1.25094
CG10741	3L:13479903-13495504	99.1394	127.493	0.362888	0.0046	0.0202277	no	1.286
CG10898	3R:7383450-7385599	8.27841	11.2282	0.439695	0.0128	0.0468167	no	1.35632
CG10948	3L:12837350-12843214	16.9085	21.8525	0.370052	0.00825	0.0328237	no	1.2924
CG10992	X:13674050-13676214	143.243	193.3	0.432375	0.0005	0.00305057	no	1.34946
CG11034	2L:5805478-5808858	1.68032	4.66502	1.47314	0.00125	0.00677261	no	2.77627
CG11071	X:13744880-13751157	0.349065	0.742988	1.08984	0.0046	0.0202277	no	2.12851
CG11138	X:12465242-12477215	24.2942	31.0197	0.352571	0.0044	0.0195186	no	1.27684
CG11147	2L:5724657-5760047	0.96711	3.93864	2.02595	0.00275	0.0131821	no	4.07259
CG11151	X:13630602-13638688	133.419	186.52	0.483365	0.0131	0.0476495	no	1.398
CG11163	2R:1662278-1670360	8.1645	12.1238	0.570401	0.0011	0.00608302	no	1.48494
CG11203	X:10806366-10814329	1.93	3.9399	1.02956	0.00405	0.0182112	no	2.0414
CG11382	X:1104129-1105746	1.24866	3.92291	1.65155	0.0061	0.0254518	no	3.1417
CG11486	3L:3071127-3088493	49.8754	72.6245	0.542129	0.0001	0.000742932	no	1.45612
CG11505	3L:3224837-3232320	20.1057	27.5703	0.455512	0.0007	0.00411544	no	1.37127
CG11577	3L:19087989-19089326	35.7407	47.0384	0.396271	0.00535	0.0228001	no	1.3161
CG1161	3R:1180821-1182467	74.5071	97.3146	0.385278	0.00535	0.0228001	no	1.30611
CG11652	3L:11686978-11690086	17.7058	24.1222	0.446139	0.007	0.0284585	no	1.36239
CG11790	3R:20873421-20875177	209.923	270.822	0.367484	0.00205	0.0103601	no	1.2901
CG11857	3R:21084618-21086492	60.3211	83.128	0.462672	0.00025	0.00166137	no	1.37809
CG11870	3R:6090027-6125587	13.0196	17.14	0.396681	0.00555	0.023512	no	1.31648
CG11872	3R:6128611-6133442	0.758265	1.56288	1.04343	0.01	0.0382752	no	2.06113
CG11873	3R:24890064-24932424	16.686	22.4336	0.427025	0.00075	0.00436447	no	1.34446
CG11876	3R:24938792-24941919	188.723	258.152	0.451951	0.0004	0.00250285	no	1.36789
CG11899	3R:25026173-25028247	193.763	289.171	0.57763	5e-05	0.000385856	no	1.4924
CG12025	3L:1865431-1867863	35.8668	47.6013	0.408352	0.00495	0.0214475	no	1.32717
CG12116	X:8359722-8377918	1.29554	3.31065	1.35356	0.00475	0.0207066	no	2.55542
CG12119	X:9100152-9104580	0.841126	3.17175	1.91488	0.00175	0.0090577	no	3.77084
CG12163	3R:1063372-1077468	245.718	311.667	0.343002	0.0042	0.0187577	no	1.26839
CG12206	X:3359769-3368553	20.3821	28.3272	0.474886	0.0011	0.00608302	no	1.38981
CG12290	3R:22055973-22059051	0.393412	1.34181	1.77007	0.01345	0.0486951	no	3.4107
CG12384	2R:7245404-7246658	487.733	694.313	0.509495	5e-05	0.000385856	no	1.42355
CG12488	2R:8592678-8640441	5.87568	8.38584	0.5132	0.00085	0.00486379	no	1.42721
CG12541	X:6916417-6960085	0.150073	0.718882	2.26009	0.009	0.0352188	no	4.79022
CG12699	2R:13134034-13134888	0.458581	2.56214	2.4821	0.01305	0.0475686	no	5.5871
CG12703	X:19644832-19656356	22.9745	33.0757	0.525739	0.0031	0.0145266	no	1.43967
CG12865	2R:10626223-10626793	0	0.832117	Inf	0.00085	0.00486379	no	Inf
CG12885	3R:23356034-23359655	0.437498	1.27354	1.54149	0.0086	0.0339952	no	2.91096
CG13003	X:16738839-16747269	1.29708	2.87894	1.15027	0.0001	0.000742932	no	2.21955
CG13004	X:16720810-16729547	4.82084	7.06886	0.552191	0.0024	0.0118288	no	1.46631
CG13031	3L:16717990-16718414	0	4.77936	Inf	5e-05	0.000385856	no	Inf
CG13075	3L:16077092-16078364	0.290972	2.1663	2.89628	0.00885	0.034727	no	7.44505
CG1309	3L:4259418-4262461	30.6826	42.3486	0.464895	0.0051	0.0219752	no	1.38022
CG13159	2R:8262793-8263183	0	3.47537	Inf	0.00125	0.00677261	no	Inf
CG13349	2R:9846032-9847909	198.528	248.374	0.32317	0.01085	0.0409613	no	1.25108
CG13364	X:517499-519234	440.087	578.568	0.3947	0.00495	0.0214475	no	1.31467
CG13384	2L:8384429-8389304	18.6385	23.9962	0.364525	0.0115	0.0430735	no	1.28745
CG13551	2R:19265382-19270944	657.991	851.498	0.371935	0.0036	0.0164643	no	1.29409
CG13663	3R:21040046-21040910	17.4796	24.8246	0.506104	0.0043	0.0191344	no	1.4202
CG1371	2R:5956613-5963147	45.9663	63.8319	0.4737	0.0002	0.00137166	no	1.38867
CG13847	3R:18250935-18261490	0.0997588	1.23789	3.63329	0.0033	0.0152799	no	12.4088
CG13887	3L:837855-839747	129.595	191.349	0.562194	5e-05	0.000385856	no	1.47652
CG13897	3L:737676-739120	36.6599	50.7037	0.46789	0.0023	0.0113883	no	1.38308
CG1399	2R:3564044-3586395	31.902	41.0527	0.363833	0.0045	0.0199106	no	1.28684
CG14023	2L:5316239-5324936	13.4516	17.3475	0.366951	0.00485	0.0210996	no	1.28962
CG14052	X:2117883-2118698	0	1.4422	Inf	5e-05	0.000385856	no	Inf
CG14118	3L:12885757-12887858	0.432357	1.68192	1.95981	0.00695	0.0283089	no	3.89012
CG14318	3R:13602967-13609720	0.456052	1.14814	1.33203	0.0107	0.04052	no	2.51756
CG14375	3R:9214780-9220912	0.391936	1.80774	2.2055	0.00155	0.00817065	no	4.61233
CG14395	3R:8489942-8499681	1.71294	3.64186	1.0882	0.00215	0.0107701	no	2.12609
CG14439	X:6641581-6649785	46.0487	58.1147	0.335744	0.0133	0.048295	no	1.26203
CG14476	X:21471626-21476294	253.934	322.417	0.344475	0.0037	0.0168318	no	1.26969
CG14598	3R:3265487-3267714	10.7663	14.8709	0.465968	0.0116	0.0433343	no	1.38125
CG14608	3R:3050809-3066860	1.31696	3.39833	1.36762	0.0001	0.000742932	no	2.58044
CG1486	X:21195071-21199176	20.5566	26.4975	0.366254	0.00625	0.0259765	no	1.289
CG14911	3L:6393691-6479064	13.2194	17.9212	0.43901	0.00125	0.00677261	no	1.35567
CG14946	2L:12063522-12066772	1.45588	4.20387	1.52983	5e-05	0.000385856	no	2.88751
CG15080	2R:14670805-14682105	0.33438	0.964549	1.52837	0.00545	0.0231227	no	2.88459
CG15186	3R:2308517-2320755	0.103467	0.741213	2.84072	0.00015	0.00106015	no	7.16376
CG15649	2R:16860420-16861502	0	0.840753	Inf	0.0004	0.00250285	no	Inf
CG15673	2R:17495897-17500594	0.947807	3.49866	1.88414	0.00575	0.0241799	no	3.69132
CG15894	X:6210130-6221886	0.22003	0.785326	1.83559	0.00565	0.0238766	no	3.56918
CG1625	2R:5710581-5714988	0.0693778	1.21155	4.12624	0.00015	0.00106015	no	17.4631
CG1637	X:10763319-10771840	47.1146	63.9958	0.441803	0.00125	0.00677261	no	1.3583
CG16778	2R:20973302-21027064	0.448586	1.11893	1.31866	0.0042	0.0187577	no	2.49435
CG16974	2L:13184941-13191949	72.2281	107.484	0.573493	5e-05	0.000385856	no	1.48812
CG16979	3L:15569665-15571774	26.7265	37.305	0.481101	0.00045	0.00277317	no	1.39581
CG1698	2R:5653866-5694370	0.36245	2.42887	2.74443	5e-05	0.000385856	no	6.70126
CG1702	X:20338706-20340823	23.9828	35.75	0.575939	0.0079	0.0316517	no	1.49065
CG1703	X:11506049-11509161	50.0386	70.9905	0.504586	0.00015	0.00106015	no	1.41871
CG17119	3R:18880131-18883268	0.837156	4.50854	2.42909	0.00065	0.00383464	no	5.38554
CG17121	3R:18870385-18873910	46.2306	65.3215	0.498711	0.0003	0.0019424	no	1.41295
CG17259	2L:3035492-3037403	134.629	197.539	0.553148	5e-05	0.000385856	no	1.46728
CG17386	2R:10307845-10312099	0.317038	1.33026	2.06898	0.0002	0.00137166	no	4.1959
CG17454	3L:23708124-23709789	49.055	72.8325	0.570182	5e-05	0.000385856	no	1.48471
CG1753	X:20916164-20920127	125.738	163.91	0.382478	0.002	0.0101613	no	1.30358
CG17598	X:21917034-21943860	27.7544	39.4185	0.506157	0.00175	0.0090577	no	1.42026
CG17646	2L:1732525-1750613	1.96801	4.00424	1.02479	0.00125	0.00677261	no	2.03466
CG1773	2R:5593788-5596227	0.406762	3.35414	3.04368	0.00275	0.0131821	no	8.24595
CG17931	3R:12183865-12185830	62.3131	85.3742	0.454264	0.00065	0.00383464	no	1.37008
CG18343	2R:8026306-8026781	54.9375	81.5999	0.570776	0.00475	0.0207066	no	1.48532
CG1840	X:11782390-11783222	17.1692	24.403	0.507232	0.012	0.044441	no	1.42132
CG18812	2R:3605832-3623124	17.6362	23.919	0.439618	0.0019	0.00972246	no	1.35624
CG1907	3R:25444755-25446480	19.908	26.6163	0.418959	0.00765	0.0307941	no	1.33697
CG1969	3R:25565566-25567674	68.6783	99.6554	0.537092	0.00015	0.00106015	no	1.45105
CG2004	X:8603686-8608665	69.5275	90.5727	0.381491	0.00605	0.0252925	no	1.30269
CG2269	2R:5975075-5983921	0.83374	1.52275	0.869007	0.0124	0.0456657	no	1.82641
CG2747	3R:3839545-3856505	24.1681	34.3391	0.506747	0.01205	0.0445684	no	1.42084
CG2767	3R:3831645-3833841	210.951	310.235	0.556456	5e-05	0.000385856	no	1.47065
CG2947	X:3684001-3686510	43.2401	64.1515	0.569113	5e-05	0.000385856	no	1.48361
CG30083	2R:11599101-11600149	0	0.806641	Inf	5e-05	0.000385856	no	Inf
CG30101	2R:13295762-13297705	0.88582	3.74276	2.07902	0.001	0.00561337	no	4.22519
CG30104	2R:13372501-13380680	0.312586	2.1859	2.8059	0.00175	0.0090577	no	6.99296
CG30359	2R:4350277-4352597	7.90675	11.5237	0.543448	0.0097	0.0374618	no	1.45745
CG30389	2R:17036237-17048050	26.4503	34.2925	0.374612	0.00385	0.0174308	no	1.29649
CG30440	2R:1355818-1383341	24.1068	34.1764	0.50356	0.0001	0.000742932	no	1.41771
CG31036	3R:25733830-25738614	0.171417	0.916296	2.4183	0.00075	0.00436447	no	5.34542
CG31140	3R:19788901-19808950	0.819377	1.94921	1.25029	0.0006	0.0035816	no	2.37889
CG31145	3R:19431472-19495378	0.482088	1.77216	1.87814	0.0029	0.0137702	no	3.67601
CG31176	3R:17498017-17545380	1.66717	3.37509	1.01753	0.0019	0.00972246	no	2.02444
CG31224	3R:14470176-14484963	23.4831	31.2658	0.412965	0.0011	0.00608302	no	1.33142
CG31324	3R:21932591-21955912	0.590914	1.85974	1.65408	0.00625	0.0259765	no	3.14723
CG31344	3R:11049090-11051144	17.7152	23.4206	0.402784	0.0125	0.0458762	no	1.32206
CG31715	2L:10341620-10342527	90.2497	133.806	0.568151	5e-05	0.000385856	no	1.48262
CG31717	2L:10250736-10251594	20.2335	30.1241	0.57417	0.01155	0.0432041	no	1.48882
CG31728	2L:13255407-13257426	10.0524	14.525	0.530995	0.00505	0.0218146	no	1.44493
CG32100	3L:12260651-12262300	7.47255	10.8868	0.542909	0.0093	0.0362273	no	1.45691
CG32103	3L:12396604-12407942	26.0027	34.1097	0.391519	0.00575	0.0241799	no	1.31178
CG32541	X:18824391-18920905	11.016	14.7506	0.42117	0.00205	0.0103601	no	1.33902
CG32549	X:18284520-18304168	13.6416	18.6267	0.449355	0.0097	0.0374618	no	1.36543
CG32627	X:13576939-13612316	0.629788	3.15008	2.32245	0.0117	0.0436128	no	5.00181
CG32676	X:10607150-10642839	23.337	32.1196	0.460836	0.01	0.0382752	no	1.37634
CG32702	X:9452697-9465341	1.94629	3.6617	0.911787	5e-05	0.000385856	no	1.88137
CG32789	X:3693180-3695607	24.8118	33.9673	0.453121	0.0009	0.00512934	no	1.369
CG3295	2R:16899476-16904951	36.5099	54.4891	0.577678	0.0025	0.0122162	no	1.49245
CG33123	2L:3510476-3514662	45.1693	57.4382	0.346668	0.00495	0.0214475	no	1.27162
CG33129	2L:10964902-10970275	269.53	380.2	0.496313	5e-05	0.000385856	no	1.4106
CG33232	3L:2466902-2503584	14.3296	21.1138	0.559189	0.00265	0.0128393	no	1.47344
CG33275	3L:7586205-7632681	17.442	22.5027	0.367533	0.00875	0.0343977	no	1.29014
CG33291	3L:21638059-21659405	28.9342	41.1421	0.507836	5e-05	0.000385856	no	1.42192
CG33303	2L:10374185-10375790	282	409.868	0.539462	5e-05	0.000385856	no	1.45343
CG33558	2R:2813206-2859139	16.6835	21.5564	0.369698	0.00715	0.0289858	no	1.29208
CG3394	2R:20181620-20185646	1.17507	2.92854	1.31744	0.01145	0.0429237	no	2.49223
CG34253	3L:18079490-18080416	0.282068	2.62499	3.21819	0.00335	0.0154947	no	9.30623
CG34383	3R:9540944-9588535	14.9809	21.2251	0.502649	5e-05	0.000385856	no	1.41681
CG34394	2L:3358639-3373047	10.5537	13.3918	0.3436	0.01115	0.0419459	no	1.26892
CG34401	X:18759472-18774672	24.0322	30.5344	0.345469	0.00445	0.0197302	no	1.27056
CG34408	X:10114142-10123948	22.9281	32.971	0.524077	5e-05	0.000385856	no	1.43802
CG3662	2L:821417-825861	83.0423	112.404	0.436776	0.0014	0.00748122	no	1.35358
CG3726	X:5811209-5835703	0.806945	3.212	1.99293	5e-05	0.000385856	no	3.98044
CG3829	2R:20873477-20878012	0.674051	2.5175	1.90106	0.0001	0.000742932	no	3.73488
CG3887	2L:5011080-5012127	165.402	206.506	0.320202	0.01295	0.0473048	no	1.24851
CG3902	3L:18885482-18891390	120.765	172.197	0.511861	5e-05	0.000385856	no	1.42588
CG3939	X:3067408-3070257	67.4629	90.5934	0.425311	0.0035	0.0160756	no	1.34286
CG3999	3R:6077239-6081002	0.236176	1.22019	2.36917	0.00165	0.00860773	no	5.16644
CG4221	3R:11746634-11759456	23.3107	32.3461	0.472601	0.0006	0.0035816	no	1.38761
CG42248	X:702249-778497	3.40131	5.03167	0.564945	0.00065	0.00383464	no	1.47933
CG42345	2R:1301240-1342518	6.54965	9.79591	0.580762	0.00025	0.00166137	no	1.49564
CG42457	3R:13757594-13841501	1.33695	3.06865	1.19865	5e-05	0.000385856	no	2.29526
CG42511	3R:5230096-5233579	27.3314	36.7155	0.425833	0.00295	0.0139381	no	1.34335
CG42533	2L:7472504-7495618	7.85362	10.1881	0.375461	0.00535	0.0228001	no	1.29725
CG42730	2L:6127871-6130659	0.0784029	1.17299	3.90313	0.00955	0.0369825	no	14.9611
CG42792	2L:15865091-15865423	0	3.11003	Inf	0.00675	0.0276125	no	Inf
CG4324	2R:19902432-19904719	11.349	15.8565	0.482511	0.00885	0.034727	no	1.39717
CG4408	3R:19187610-19189760	0.387028	1.79665	2.2148	0.00325	0.0150892	no	4.64217
CG4433	3R:15844299-15847038	16.6935	23.306	0.481414	0.0026	0.01264	no	1.39611
CG4525	3R:11600096-11603364	0.0843195	1.1625	3.78523	0.00975	0.0375702	no	13.7868
CG4589	2R:20397284-20402813	25.6148	35.5951	0.474701	0.0002	0.00137166	no	1.38963
CG4603	3L:5127320-5128770	42.5757	56.0102	0.395661	0.0054	0.022956	no	1.31554
CG4607	X:6963445-6966722	0.667299	3.8049	2.51145	0.0003	0.0019424	no	5.70194
CG4612	2R:20411206-20413617	53.4737	67.9227	0.345063	0.0062	0.0258062	no	1.27021
CG4670	2R:9119262-9122547	39.4572	56.678	0.522498	5e-05	0.000385856	no	1.43644
CG4692	2R:20485517-20487344	904.295	1190.55	0.396765	0.0021	0.0105629	no	1.31655
CG4702	3R:7947298-7953919	1.54821	4.25275	1.45779	0.00535	0.0228001	no	2.74688
CG4769	3L:5353289-5355898	85.2004	113.472	0.413399	0.0022	0.0109821	no	1.33182
CG4822	2L:117078-121974	0.690575	2.64359	1.93663	0.0001	0.000742932	no	3.8281
CG4836	3R:15839593-15843976	0.113593	0.908069	2.99893	0.00635	0.0263155	no	7.99406
CG4848	3R:8041376-8045412	17.6666	23.1082	0.387384	0.00775	0.0311527	no	1.30802
CG4882	2R:19765981-19769954	50.9816	68.0561	0.416749	0.0027	0.013008	no	1.33491
CG4950	3L:16259516-16261256	1.03721	4.36568	2.0735	5e-05	0.000385856	no	4.20906
CG5010	X:17043070-17044680	107.724	142.081	0.399376	0.00345	0.01588	no	1.31894
CG5021	3L:8959939-8961484	37.5944	52.0753	0.470083	0.00155	0.00817065	no	1.38519
CG5060	3R:16078504-16116840	28.883	39.428	0.448997	0.00635	0.0263155	no	1.36509
CG5112	3R:21317211-21318985	78.4877	111.714	0.509274	5e-05	0.000385856	no	1.42333
CG5195	3L:20446392-20457448	0.710232	1.48806	1.06707	0.00935	0.0363724	no	2.09517
CG5273	X:653627-655972	74.211	105.322	0.505106	0.0002	0.00137166	no	1.41922
CG5284	3L:16083553-16090593	21.5033	27.8107	0.371086	0.00475	0.0207066	no	1.29332
CG5315	3R:18369413-18373567	47.2176	61.6884	0.385674	0.00255	0.012418	no	1.30647
CG5322	2L:10452676-10456044	0.476094	1.99474	2.06688	5e-05	0.000385856	no	4.1898
CG5510	3R:19989689-19995283	77.7016	105.24	0.437667	0.01375	0.0495926	no	1.35441
CG5554	2R:19732414-19734547	255.439	330.864	0.37326	0.0022	0.0109821	no	1.29528
CG5567	3L:17834634-17836642	20.6562	30.876	0.579913	0.0003	0.0019424	no	1.49476
CG5630	3R:16734934-16771252	62.0047	78.7099	0.344167	0.00875	0.0343977	no	1.26942
CG5687	3L:1933630-1938740	2.34754	4.95379	1.07738	0.0018	0.00928843	no	2.1102
CG5721	2R:14068000-14071618	54.1255	74.5007	0.460945	0.0012	0.00656818	no	1.37644
CG5731	2L:10207084-10209737	10.608	15.0459	0.504215	0.00165	0.00860773	no	1.41835
CG5850	2L:9960449-9963767	29.053	37.9762	0.386407	0.00525	0.0225195	no	1.30714
CG5921	X:5953942-5958324	1.82646	3.56552	0.965061	0.00955	0.0369825	no	1.95215
CG5953	2L:16509119-16532877	0.779363	1.76564	1.17983	0.0075	0.0302757	no	2.26549
CG5966	X:5882844-5886677	0.758909	3.85605	2.34512	0.00015	0.00106015	no	5.08104
CG6051	3R:22951158-22976720	14.8121	20.299	0.45463	0.00185	0.00951778	no	1.37043
CG6118	3R:11246825-11259906	0.0630358	2.35998	5.22646	0.00025	0.00166137	no	37.4387
CG6125	3R:11228525-11232789	0.187685	1.01032	2.42843	0.0037	0.0168318	no	5.38306
CG6129	3R:19939316-19955976	0.365278	1.41942	1.95823	0.00085	0.00486379	no	3.88586
CG6234	3R:8473781-8478635	83.6472	122.7	0.552741	5e-05	0.000385856	no	1.46688
CG6259	3L:17613217-17614598	44.7805	61.1304	0.44902	0.0023	0.0113883	no	1.36511
CG6357	2R:9727580-9729248	20.4472	29.4936	0.528499	0.00035	0.00223239	no	1.44243
CG6370	2R:13652076-13655263	214.168	310.331	0.535064	5e-05	0.000385856	no	1.44901
CG6372	3L:8610334-8612574	0.237605	1.18562	2.31901	0.01075	0.0406554	no	4.98988
CG6652	3L:17013439-17015956	0.144983	0.710553	2.29306	0.00975	0.0375702	no	4.90094
CG6680	3L:20310327-20313042	26.9162	35.1283	0.384161	0.005	0.0216422	no	1.3051
CG6766	2L:12038612-12040682	38.3087	56.805	0.568346	5e-05	0.000385856	no	1.48282
CG6838	3L:22707412-22710677	60.5211	86.121	0.508927	0.00015	0.00106015	no	1.42299
CG6928	3L:11996275-12001156	13.113	18.7937	0.519254	0.0014	0.00748122	no	1.43321
CG7115	2L:7821533-7825376	18.6124	24.941	0.422259	0.0028	0.013362	no	1.34002
CG7177	3L:21536949-21547994	12.4033	16.1549	0.381244	0.00355	0.0162791	no	1.30247
CG7188	3L:8300240-8302062	88.3324	115.448	0.386231	0.0032	0.0149055	no	1.30697
CG7224	2L:7998933-8004267	49.4638	71.0088	0.521625	0.00915	0.0357731	no	1.43557
CG7227	2L:7994836-7998144	0.0829832	1.08772	3.71235	0.0064	0.0264715	no	13.1077
CG7456	2L:10483284-10488623	22.9426	33.0805	0.527956	0.0013	0.00701689	no	1.44188
CG7556	X:19071029-19073988	35.2636	50.8111	0.526964	0.00035	0.00223239	no	1.44089
CG7834	3R:25627447-25628675	301.066	402.007	0.417142	0.00105	0.00585185	no	1.33528
CG7852	3L:1537148-1544826	9.88668	12.9235	0.386439	0.0074	0.0299002	no	1.30716
CG7896	3R:25809173-25816514	42.7109	62.8922	0.558277	5e-05	0.000385856	no	1.47251
CG7945	3L:15513420-15517201	35.8399	49.1127	0.454531	0.00125	0.00677261	no	1.37034
CG7991	3L:1674708-1715541	22.5362	29.6246	0.394548	0.0036	0.0164643	no	1.31453
CG8026	2R:5074174-5079600	28.2637	39.2503	0.473752	0.0021	0.0105629	no	1.38872
CG8089	2R:11033329-11035329	5.14044	7.52776	0.550328	0.0034	0.0156751	no	1.46442
CG8100	3L:14076727-14078834	0.253215	2.26161	3.15891	0.00025	0.00166137	no	8.93158
CG8207	2R:11564722-11566444	29.5474	38.4515	0.380007	0.0122	0.0450842	no	1.30135
CG8213	2R:4856840-4873063	0.570454	4.62774	3.02013	5e-05	0.000385856	no	8.11238
CG8230	2R:4831800-4834866	37.5508	54.4243	0.535407	5e-05	0.000385856	no	1.44935
CG8239	X:15643209-15645255	12.2824	17.8131	0.536351	0.0022	0.0109821	no	1.45029
CG8306	2R:12477023-12482218	71.4172	95.727	0.422655	0.00075	0.00436447	no	1.34039
CG8557	X:17350589-17400830	27.759	35.9155	0.371648	0.00345	0.01588	no	1.29383
CG8602	3L:7319372-7321958	23.8547	31.7217	0.411194	0.00275	0.0131821	no	1.32979
CG8605	3L:7316728-7319358	16.6229	24.1744	0.540306	0.00065	0.00383464	no	1.45428
CG8683	2L:8116964-8124001	18.4044	24.6869	0.423699	0.00135	0.00725477	no	1.34136
CG8785	2R:8528194-8535718	0.105944	2.80029	4.7242	0.00465	0.0204057	no	26.4318
CG8854	2R:8111963-8114351	0.488393	1.73847	1.83171	0.0066	0.0271154	no	3.55957
CG9063	3L:22250846-22255995	20.6914	27.2222	0.395749	0.0033	0.0152799	no	1.31563
CG9257	2L:21102738-21104329	22.7143	30.4712	0.423846	0.0032	0.0149055	no	1.3415
CG9356	3R:5227241-5229991	16.2169	23.0354	0.506359	0.0057	0.0240286	no	1.42046
CG9467	3R:5623490-5626773	28.5221	36.5564	0.358043	0.0086	0.0339952	no	1.28169
CG9527	2L:6445069-6448016	18.5543	26.3668	0.506972	0.00095	0.00537497	no	1.42106
CG9586	2L:9164234-9166543	43.2404	55.0458	0.34825	0.0134	0.0485757	no	1.27302
CG9634	X:16621335-16645943	62.1537	76.5089	0.299789	0.0129	0.0471624	no	1.23096
CG9669	3L:16835398-16838165	191.525	278.236	0.538776	0.0099	0.0380284	no	1.45274
CG9821	3R:4643362-4646386	37.7058	52.4975	0.477464	0.0005	0.00305057	no	1.39229
CG9822	2R:17234379-17235356	0	0.89558	Inf	5e-05	0.000385856	no	Inf
CG9837	3R:4634669-4635588	0.470035	2.13072	2.1805	0.0137	0.0494539	no	4.53311
CG9911	X:16187885-16197341	79.7387	106.752	0.420908	0.00435	0.0193168	no	1.33877
CG9941	X:13612766-13616058	25.0507	33.4814	0.418507	0.00165	0.00860773	no	1.33655
CG9989	3R:24496457-24497743	0.518651	4.88926	3.23678	0.0001	0.000742932	no	9.42688
Chc	X:15722018-15729507	188.622	244.618	0.375031	0.00115	0.00632685	no	1.29687
chic	2L:5972899-5981025	456.495	634.24	0.474428	5e-05	0.000385856	no	1.38937
Cirl	2R:4502543-4512708	181.789	245.647	0.434321	0.00015	0.00106015	no	1.35128
Clbn	3R:20953223-20956877	17.5478	23.2202	0.404087	0.00175	0.0090577	no	1.32325
Clc	3L:20224789-20238412	270.657	374.421	0.468197	0.00245	0.0120337	no	1.38338
Cnx99A	3R:25140964-25145366	95.0601	141.124	0.570053	5e-05	0.000385856	no	1.48458
comm	3L:15715427-15721654	25.1416	33.9843	0.434792	0.00375	0.0170321	no	1.35172
Con	3L:4938047-4976172	1.10194	2.36815	1.10371	0.00045	0.00277317	no	2.14907
corto	3R:909342-912408	28.3147	37.1254	0.390855	0.00265	0.0128393	no	1.31117
Cpr	2L:6338771-6346282	48.226	60.4063	0.324887	0.012	0.044441	no	1.25257
Cpr47Ee	2R:7152630-7154361	0.317711	4.06047	3.67586	0.0012	0.00656818	no	12.7804
Cpr92F	3R:16495292-16498538	0.57626	4.30373	2.9008	0.0003	0.0019424	no	7.46838
crb	3R:20121137-20140165	51.0571	63.9546	0.324937	0.00605	0.0252925	no	1.25261
crc	2L:21310853-21319536	615.368	804.929	0.387412	0.0008	0.00462714	no	1.30804
Csat	X:2595156-2597809	27.0947	37.9559	0.486313	0.0006	0.0035816	no	1.40086
CycG	3R:27424171-27440927	186.063	237.095	0.349674	0.0076	0.0306216	no	1.27427
Cyp309a1	2L:2562884-2564848	0.279477	4.03252	3.85088	0.0009	0.00512934	no	14.4288
Cyp6a13	2R:4458006-4459650	1.0079	3.94607	1.96907	0.002	0.0101613	no	3.91514
Dh31-R1	2R:9155301-9183429	1.72252	3.76933	1.12979	0.00125	0.00677261	no	2.18826
didum	2R:3387659-3397959	11.9749	17.2294	0.52486	0.0003	0.0019424	no	1.43879
dikar	3L:6723261-6736249	13.3094	17.712	0.412279	0.00635	0.0263155	no	1.33079
dome	X:19570089-19577549	56.5585	70.3315	0.314429	0.01005	0.0384151	no	1.24352
drm	2L:3539250-3548086	49.6751	70.0167	0.495177	5e-05	0.000385856	no	1.40949
drongo	2L:833583-851096	58.3877	74.1271	0.344338	0.01135	0.0425861	no	1.26957
drpr	3L:1715593-1735755	28.1701	39.7498	0.496782	0.0022	0.0109821	no	1.41106
Duox	2L:2815969-2830236	29.4814	41.9593	0.509187	0.0001	0.000742932	no	1.42325
E(spl)	3R:21866045-21866585	136.271	193.853	0.508491	0.00085	0.00486379	no	1.42256
Eaf	2R:3285730-3295326	31.535	46.3048	0.554206	0.00015	0.00106015	no	1.46836
Ect4	3L:8067546-8101938	15.1956	21.5057	0.501061	0.0025	0.0122162	no	1.41526
ed	2L:4031378-4115059	112.412	157.557	0.487073	5e-05	0.000385856	no	1.4016
Edem2	2L:13192205-13203269	17.5178	23.7559	0.439465	0.0078	0.0313097	no	1.3561
Edg84A	3R:2510171-2510855	0	1.87088	Inf	5e-05	0.000385856	no	Inf
eEF1delta	2L:10232492-10234450	465.008	570.542	0.295078	0.01225	0.04523	no	1.22695
eff	3R:10558411-10566933	259.201	384.328	0.568271	5e-05	0.000385856	no	1.48274
eIF-2alpha	X:16339527-16341007	274.101	339.344	0.308042	0.01045	0.0397843	no	1.23803
eIF2B-delta	2R:19274015-19284202	52.7845	75.0786	0.508288	0.0018	0.00928843	no	1.42236
eIF-2beta	3L:12514228-12519837	295.823	402.789	0.445291	0.00085	0.00486379	no	1.36159
Eig71Eh	3L:15652032-15652552	0	0.80924	Inf	5e-05	0.000385856	no	Inf
Eig71Ei	3L:15652806-15653314	0	1.23086	Inf	0.0002	0.00137166	no	Inf
Eip63E	3L:3515684-3610521	23.2185	34.6374	0.577057	0.00015	0.00106015	no	1.4918
emc	3L:749405-753505	245.119	312.254	0.349238	0.0024	0.0118288	no	1.27389
Eno	2L:1724973-1729629	597.433	797.128	0.416035	0.0008	0.00462714	no	1.33426
ens	3L:4123547-4134550	35.3997	45.7927	0.371383	0.00245	0.0120337	no	1.29359
eRF1	3L:20341429-20346229	176.493	223.693	0.341903	0.00435	0.0193168	no	1.26743
eya	2L:6527448-6546972	1.97181	4.05702	1.0409	0.00135	0.00725477	no	2.05751
Fer1	3R:2961929-2967694	0.119565	1.27168	3.41088	0.01075	0.0406554	no	10.6359
Fim	X:17179735-17196011	28.1099	41.4731	0.561097	5e-05	0.000385856	no	1.47539
fne	X:12832567-12839836	0.276505	0.864193	1.64405	0.00185	0.00951778	no	3.12542
fog	X:22227997-22257020	2.63498	3.94035	0.580533	0.00095	0.00537497	no	1.4954
foxo	3R:9882673-9913698	9.51168	13.5145	0.506733	0.0003	0.0019424	no	1.42083
ft	2L:4198401-4217852	40.1471	50.9204	0.342949	0.0036	0.0164643	no	1.26835
FucT6	X:11600607-11603983	20.368	29.9451	0.556014	0.0002	0.00137166	no	1.4702
fus	2R:11544822-11564198	43.2796	54.2464	0.325842	0.0105	0.0399392	no	1.25339
futsch	X:1307910-1345416	0.821373	2.11721	1.36606	5e-05	0.000385856	no	2.57765
g	X:13621235-13630311	18.9953	23.7652	0.323209	0.0131	0.0476495	no	1.25111
GalNAc-T1	2R:11399217-11403102	37.81	51.7047	0.451528	0.00045	0.00277317	no	1.36749
GckIII	3R:12911255-12913620	39.2909	58.3722	0.571086	5e-05	0.000385856	no	1.48564
gcm	2L:9578535-9581742	0.757077	3.3183	2.13193	0.00025	0.00166137	no	4.38304
Gdi	2L:9491917-9494927	273.111	403.674	0.563702	5e-05	0.000385856	no	1.47806
gem	2R:6011792-6024977	20.39	29.0656	0.511452	0.0001	0.000742932	no	1.42548
Gfat2	3R:24162740-24165490	72.442	101.056	0.480254	5e-05	0.000385856	no	1.39499
gish	3R:12098175-12128094	56.7384	71.9789	0.343249	0.0064	0.0264715	no	1.26861
GlcAT-I	X:4025249-4026866	15.4427	22.6761	0.554247	0.00065	0.00383464	no	1.4684
GlcAT-P	3L:11170047-11190603	0.590997	2.97362	2.331	5e-05	0.000385856	no	5.03153
Gli	2L:15756000-15762755	54.5754	78.1345	0.517708	5e-05	0.000385856	no	1.43168
Gmap	X:15380954-15404822	8.928	12.4372	0.478252	0.00065	0.00383464	no	1.39306
GNBP1	3L:18668912-18670983	45.8404	59.2457	0.370093	0.00515	0.0221794	no	1.29243
GNBP3	3L:8948120-8949651	243.604	307.781	0.337365	0.00525	0.0225195	no	1.26345
G-oalpha47A	2R:6325465-6351297	10.5008	13.8064	0.394833	0.00655	0.0269747	no	1.3148
Gos28	3R:14489463-14491029	32.6958	45.139	0.465268	0.0074	0.0299002	no	1.38057
gpp	3R:2232578-2273729	19.2286	24.7845	0.366182	0.0029	0.0137702	no	1.28894
Grip	X:5860313-5880729	9.9874	13.2085	0.403289	0.00945	0.036645	no	1.32252
H15	2L:5404341-5415928	17.5665	22.6363	0.365811	0.01055	0.0400582	no	1.28861
ham	2L:18763493-18782304	0.206024	1.03822	2.33323	0.0028	0.013362	no	5.03932
hbs	2R:10898902-10928901	30.3079	42.4897	0.487419	0.0002	0.00137166	no	1.40193
Herp	2L:7796307-7799846	15.6856	21.5501	0.458253	0.0021	0.0105629	no	1.37388
Hex-A	X:9479917-9482434	30.6022	41.0944	0.425306	0.0013	0.00701689	no	1.34286
Hexo1	3L:4288641-4292389	187.082	253.602	0.438896	0.00125	0.00677261	no	1.35557
Hnf4	2L:8687280-8709038	14.6103	19.7366	0.43389	0.0049	0.0212847	no	1.35087
how	3R:17867913-17905043	30.484	42.1756	0.46836	0.00165	0.00860773	no	1.38353
Hr78	3L:21487118-21490585	65.8615	84.1775	0.354	0.0046	0.0202277	no	1.2781
Hrs	2L:2739985-2744934	28.1174	36.0034	0.35667	0.01185	0.0440569	no	1.28047
Hsp23	3L:9374983-9375867	2944.05	3979.77	0.43488	0.00015	0.00106015	no	1.3518
Hsp83	3L:3193026-3197061	933.36	1196.37	0.358152	0.0021	0.0105629	no	1.28179
Hsromega	3R:17122344-17136428	58.2539	74.7683	0.360072	0.00995	0.0381521	no	1.28349
hth	3R:6335568-6464386	48.5213	61.0297	0.330894	0.00675	0.0276125	no	1.25779
imd	2R:14296515-14299024	14.3784	21.0481	0.549786	0.0035	0.0160756	no	1.46387
InR	3R:17398220-17445043	6.36013	8.65874	0.445101	0.0016	0.0083929	no	1.36141
inx2	X:6885644-6905168	356.211	505.976	0.506336	0.0001	0.000742932	no	1.42044
Irc	3R:12828598-12832930	0.794459	2.03234	1.3551	0.01	0.0382752	no	2.55814
ire-1	3R:15680161-15687013	16.5902	21.4466	0.37042	0.01015	0.0387455	no	1.29273
Irp-1B	3R:6234336-6238638	57.9972	80.1305	0.466368	0.00025	0.00166137	no	1.38163
jog	X:19725639-19746084	20.8522	27.7823	0.413965	0.00135	0.00725477	no	1.33234
kek2	2L:11621818-11626136	0.522792	2.12942	2.02615	5e-05	0.000385856	no	4.07317
kek5	X:19247217-19364074	35.5785	49.6515	0.480829	0.00015	0.00106015	no	1.39555
Khc	2R:12154464-12159483	65.0894	87.58	0.428178	0.0003	0.0019424	no	1.34553
Klc	3L:12738449-12743156	70.6941	97.2817	0.460577	0.00035	0.00223239	no	1.37609
Klp98A	3R:23373495-23384836	13.3573	17.9728	0.428188	0.0012	0.00656818	no	1.34554
Krn	3L:17640538-17647376	23.3899	34.2393	0.549771	0.012	0.044441	no	1.46385
KrT95D	3R:19824161-19857532	17.5415	24.272	0.468524	0.00165	0.00860773	no	1.38369
kst	3L:3336842-3368133	39.24	52.2003	0.411734	0.0004	0.00250285	no	1.33028
Kul	3R:25551551-25558388	25.8317	34.9885	0.437737	0.00055	0.0033225	no	1.35448
kuz	2L:13550140-13638238	17.5614	25.8769	0.559262	5e-05	0.000385856	no	1.47351
l(1)G0289	X:10251202-10260346	69.9519	87.7567	0.327147	0.0092	0.0359031	no	1.25453
l(1)G0334	X:4596304-4599156	84.0429	111.649	0.409775	0.00225	0.011173	no	1.32848
l(2)08717	2R:14684768-14691232	19.1509	25.2487	0.398792	0.0111	0.0417945	no	1.31841
l(2)s5379	2L:2220766-2231096	50.9025	71.25	0.485153	0.0021	0.0105629	no	1.39973
Lac	2R:8340695-8353154	229.572	289.746	0.335846	0.0043	0.0191344	no	1.26211
lama	3L:5336714-5349023	20.0497	27.1756	0.438734	0.0014	0.00748122	no	1.35541
lectin-24Db	2L:4188122-4189285	1.27556	3.10527	1.28359	0.01265	0.0463473	no	2.43444
lolal	2R:14042349-14045697	149.861	220.367	0.556278	5e-05	0.000385856	no	1.47048
lqf	3L:7521903-7531379	24.9239	32.0053	0.360781	0.0039	0.0176292	no	1.28412
luna	2R:6870280-6987508	5.72194	8.24041	0.526212	0.00875	0.0343977	no	1.44014
LysX	3L:1194738-1195302	0	1.26091	Inf	0.00085	0.00486379	no	Inf
mab-21	X:5902215-5907211	43.1559	58.718	0.444247	0.00095	0.00537497	no	1.3606
mamo	X:13763247-13861644	0.826518	1.8861	1.19029	0.0042	0.0187577	no	2.28198
mats	3R:18246876-18248568	56.7629	72.9316	0.361596	0.0094	0.0365006	no	1.28485
meso18E	X:19600430-19607074	2.23371	4.10615	0.878347	0.007	0.0284585	no	1.83826
Mical	3R:5828032-5868543	23.0389	28.6282	0.313367	0.0111	0.0417945	no	1.2426
MICAL-like	3L:13005074-13008407	19.455	25.5868	0.395256	0.0019	0.00972246	no	1.31518
miple2	3L:271639-275021	359.514	497.579	0.468878	5e-05	0.000385856	no	1.38403
Mipp1	3L:16556726-16566430	0.744417	3.07941	2.04847	0.0007	0.00411544	no	4.13667
mnb	X:17754960-17781240	18.5426	27.5052	0.568862	0.00015	0.00106015	no	1.48335
Mov34	2R:20290493-20292050	159.564	207.532	0.379198	0.00215	0.0107701	no	1.30062
MSBP	X:15781599-15784149	78.9838	99.6436	0.33522	0.0066	0.0271154	no	1.26157
msn	3L:2555774-2586540	70.8574	87.3737	0.302281	0.01345	0.0486951	no	1.23309
Msp-300	2L:5100876-5205690	8.53585	12.3338	0.531011	0.00025	0.00166137	no	1.44494
mthl5	3R:7708516-7719019	51.2695	71.0159	0.470042	0.0114	0.042755	no	1.38515
Mtp	2L:20919093-20922850	22.729	31.0663	0.450813	0.00105	0.00585185	no	1.36681
mub	3L:21872709-21919801	61.8921	77.5587	0.325533	0.00675	0.0276125	no	1.25313
NAT1	2R:8803501-8810745	146.017	208.611	0.514671	5e-05	0.000385856	no	1.42868
Nc	3L:9961542-9964102	41.5188	57.519	0.470273	0.00025	0.00166137	no	1.38537
nerfin-1	3L:909138-912319	0.455951	1.73611	1.92891	0.0007	0.00411544	no	3.80767
NijA	3L:10687456-10689974	81.4536	114.834	0.495501	0.0004	0.00250285	no	1.40981
nimC3	2L:14013747-14020208	0.668547	3.92212	2.55253	0.0012	0.00656818	no	5.86663
noc	2L:14490861-14494019	73.5745	98.8587	0.426163	0.0004	0.00250285	no	1.34365
not	3L:18611900-18615231	35.9374	46.9511	0.385675	0.00405	0.0182112	no	1.30647
Notum	3L:16016579-16025861	2.94345	4.78909	0.702244	0.0001	0.000742932	no	1.62703
nrv1	2L:6778553-6786856	40.1386	58.6982	0.548327	5e-05	0.000385856	no	1.46239
NtR	2R:18015312-18017693	1.31738	3.38294	1.36061	0.0083	0.032992	no	2.56793
Orct	3R:20101981-20104515	10.8106	15.6041	0.529483	0.0033	0.0152799	no	1.44341
Ost48	X:9050954-9052544	317.742	471.888	0.570585	5e-05	0.000385856	no	1.48513
ovo	X:4942329-4964962	19.778	28.7871	0.541529	5e-05	0.000385856	no	1.45551
Pak3	3R:12272467-12279550	17.7064	23.031	0.379304	0.0056	0.0237121	no	1.30072
pcs	2R:10868781-10879728	43.0814	56.3824	0.388177	0.0052	0.022361	no	1.30874
pcx	X:2119743-2136071	7.24304	9.41633	0.378568	0.01065	0.0404021	no	1.30005
peb	X:4511601-4520256	2.14539	4.87291	1.18355	5e-05	0.000385856	no	2.27134
pgant3	2R:2945155-2949224	23.9885	30.6997	0.35588	0.0105	0.0399392	no	1.27977
pgant5	2L:5072155-5093590	29.3073	40.388	0.462666	0.00015	0.00106015	no	1.37809
pgant8	3L:15676974-15680732	0.516264	1.50115	1.53989	0.0125	0.0458762	no	2.90772
Pino	2L:1114651-1128953	26.5536	36.4572	0.457298	0.00065	0.00383464	no	1.37297
pip	3L:19287868-19330699	22.0026	32.6832	0.570874	0.00105	0.00585185	no	1.48542
Pk61C	3L:129451-145293	24.9452	31.6129	0.341751	0.007	0.0284585	no	1.26729
porin	2L:10847226-10850868	585.781	824.178	0.492594	5e-05	0.000385856	no	1.40697
Pp2B-14D	X:16450796-16454052	25.6464	32.4171	0.338001	0.01135	0.0425861	no	1.264
PPP4R2r	X:10372865-10375977	167.731	212.04	0.338187	0.0039	0.0176292	no	1.26417
pros	3R:7197708-7219326	0.645331	3.02536	2.229	5e-05	0.000385856	no	4.68807
Pros45	X:21178612-21188690	160.711	218.715	0.444578	0.0004	0.00250285	no	1.36092
Pros54	3L:21530099-21531683	186.686	231.457	0.310133	0.0099	0.0380284	no	1.23982
Pvf3	2L:7099691-7156701	0.866589	4.7345	2.44979	5e-05	0.000385856	no	5.46337
qtc	2L:5060831-5070750	0.740651	3.8659	2.38394	0.0004	0.00250285	no	5.2196
qua	2L:17486805-17497203	0.754996	4.84744	2.68268	5e-05	0.000385856	no	6.42048
Rab1	3R:17091750-17094831	106.741	150.453	0.495192	5e-05	0.000385856	no	1.40951
Rab11	3R:16937128-16941877	192.085	254.444	0.405605	0.0005	0.00305057	no	1.32464
Rapgap1	2L:7497804-7576604	10.4784	14.9392	0.511686	0.0005	0.00305057	no	1.42571
rg	X:4979865-5145183	8.1345	11.3912	0.485789	0.0003	0.0019424	no	1.40036
Rgk1	2R:15199897-15212994	0.219118	2.0752	3.24347	0.00265	0.0128393	no	9.4707
Rheb	3R:1394617-1396213	49.3499	71.3302	0.531468	5e-05	0.000385856	no	1.4454
RhoGAP18B	X:19030258-19059362	11.2399	14.9381	0.410368	0.0048	0.0209139	no	1.32902
Rip11	X:18529674-18541596	33.1691	42.7946	0.367588	0.0072	0.0291609	no	1.29019
rk	2L:13980145-14001252	1.16718	2.89769	1.31187	5e-05	0.000385856	no	2.48264
robl	2R:13343978-13344634	136.639	178.002	0.381525	0.0063	0.0261462	no	1.30272
Rop	3L:4136784-4141398	46.8118	65.4918	0.484443	0.0046	0.0202277	no	1.39904
roq	3L:16366152-16371750	23.6408	33.8398	0.517441	5e-05	0.000385856	no	1.43142
Rpn1	3L:19908155-19911265	189.913	242.011	0.349737	0.0029	0.0137702	no	1.27433
Rpn12	3L:16576082-16577122	247.786	307.486	0.311425	0.01245	0.0457908	no	1.24093
Rpn2	3R:24979184-24982981	163.225	204.351	0.324186	0.0066	0.0271154	no	1.25196
Rpn7	3R:18273761-18287772	199.534	249.361	0.321597	0.01345	0.0486951	no	1.24972
Rpt3	X:11019220-11020840	254.728	318.268	0.321281	0.0074	0.0299002	no	1.24944
Sac1	3L:1246985-1250451	50.4182	71.0095	0.494067	0.0004	0.00250285	no	1.40841
Sap30	X:16681788-16685184	21.6106	32.0186	0.567171	0.00055	0.0033225	no	1.48162
Sap-r	3R:26707513-26714795	190.959	260.243	0.446594	0.00025	0.00166137	no	1.36282
Scr	3R:2648841-2675886	59.354	86.7516	0.547546	5e-05	0.000385856	no	1.4616
scrt	3L:3983915-3988589	0.434201	1.22692	1.4986	0.0054	0.022956	no	2.8257
Sdc	2R:17281121-17368680	51.912	64.1181	0.304665	0.012	0.044441	no	1.23513
sec24	2R:5762788-5769858	28.107	40.0876	0.512229	5e-05	0.000385856	no	1.42625
sec71	2L:13793546-13799681	13.6876	18.2386	0.414122	0.00255	0.012418	no	1.33249
sha	2R:7216766-7223482	0.206471	2.5471	3.62484	5e-05	0.000385856	no	12.3364
shg	2R:16938106-16944664	92.0886	117.855	0.355919	0.00255	0.012418	no	1.2798
shot	2R:9751741-9829615	29.6353	37.2972	0.331754	0.00535	0.0228001	no	1.25854
sick	2L:19856183-19957767	13.6864	19.9381	0.542783	0.00015	0.00106015	no	1.45678
sima	3R:25884036-25947101	29.3983	37.7157	0.359434	0.00405	0.0182112	no	1.28292
sing	X:16573347-16574095	0	2.51979	Inf	0.0002	0.00137166	no	Inf
siz	3L:21027638-21068544	13.6065	19.2399	0.499808	0.0005	0.00305057	no	1.41402
SK	X:5234270-5295156	0.21217	0.951554	2.16506	0.0017	0.00884702	no	4.48487
skd	3L:20987227-21020524	16.2294	20.5282	0.338994	0.0046	0.0202277	no	1.26488
sli	2R:11758923-11809623	34.8222	49.2595	0.500392	0.00035	0.00223239	no	1.4146
slou	3R:17374374-17383004	0.525048	1.53906	1.55152	0.0087	0.0343113	no	2.93127
sna	2L:15476592-15478269	0.20217	1.30526	2.69069	0.0137	0.0494539	no	6.45625
Snap	3L:20306733-20309677	27.301	34.3641	0.331947	0.01175	0.0437611	no	1.25871
Sobp	2R:7714667-7727035	1.83003	4.06214	1.15037	0.00335	0.0154947	no	2.21971
Sop2	2L:13827931-13833167	145.715	194.21	0.414465	0.00645	0.0266268	no	1.33281
Sox100B	3R:26891078-26909129	1.50048	3.59677	1.26128	0.00315	0.0147206	no	2.39708
Sox14	2R:19866743-19872700	17.6951	24.5762	0.473915	0.00255	0.012418	no	1.38887
spen	2L:159033-203251	17.7724	23.5639	0.406937	0.00065	0.00383464	no	1.32587
Spn27A	2L:6663964-6676635	212.574	289.663	0.446408	0.0013	0.00701689	no	1.36265
spz	3R:22890791-22895790	2.44303	4.43361	0.859813	0.0047	0.0205724	no	1.8148
sqh	X:6117093-6119196	295.353	391.314	0.405886	0.0008	0.00462714	no	1.3249
Src64B	3L:4594515-4626196	10.714	15.1813	0.502792	0.00055	0.0033225	no	1.41696
srp	3R:11811922-11829807	0.638469	2.39616	1.90803	5e-05	0.000385856	no	3.75298
Srp14	3R:16405845-16407244	152.451	206.943	0.440889	0.00525	0.0225195	no	1.35744
Srp19	3L:7340409-7341125	84.6207	114.119	0.431452	0.00295	0.0139381	no	1.34859
Srp9	3L:7929474-7930358	38.4208	49.5282	0.366364	0.0116	0.0433343	no	1.2891
ss	3R:12200147-12229405	2.92053	4.35965	0.577981	0.0023	0.0113883	no	1.49276
Stam	2L:10858527-10862015	37.3644	47.2257	0.337909	0.01115	0.0419459	no	1.26392
stan	2R:6561060-6608643	17.2667	25.8456	0.581925	5e-05	0.000385856	no	1.49685
Surf4	3R:11169374-11171905	90.4894	113.082	0.321551	0.00935	0.0363724	no	1.24967
svr	X:390503-403113	20.4948	29.1471	0.508099	0.00025	0.00166137	no	1.42217
Syx5	2L:16307358-16309273	29.6394	43.2545	0.545334	5e-05	0.000385856	no	1.45936
Tab2	2R:15180072-15191529	11.3699	16.6341	0.548921	0.00075	0.00436447	no	1.46299
tai	2L:9166801-9247186	15.5669	20.513	0.398053	0.002	0.0101613	no	1.31773
Tango14	2L:1158678-1160221	43.9094	59.0764	0.428052	0.0064	0.0264715	no	1.34542
Tango5	X:10654080-10658269	16.2426	23.7466	0.547938	0.00065	0.00383464	no	1.462
Tektin-C	3L:5787495-5789666	0.19014	2.44713	3.68595	5e-05	0.000385856	no	12.8701
Ten-a	X:12087913-12226216	23.4492	31.652	0.432762	0.00045	0.00277317	no	1.34981
Ten-m	3L:22286131-22400987	37.0541	50.1059	0.435348	0.0003	0.0019424	no	1.35224
TepI	2L:15888638-15893811	0.351804	1.86612	2.4072	5e-05	0.000385856	no	5.30443
TER94	2R:5876665-5881072	448.212	555.847	0.310506	0.00805	0.0321325	no	1.24014
TfIIFalpha	3R:2206180-2208326	39.2098	51.482	0.392854	0.0033	0.0152799	no	1.31299
th	3L:16031504-16043755	211.626	291.271	0.460844	0.00015	0.00106015	no	1.37635
Thiolase	2R:19752943-19756139	273.703	355.31	0.376465	0.0027	0.013008	no	1.29816
TM9SF4	2L:13771086-13774310	38.4345	51.9934	0.43593	0.0005	0.00305057	no	1.35278
tna	3L:10828627-10867746	40.1558	51.7372	0.365593	0.00845	0.033495	no	1.28841
Tollo	3L:15228740-15235932	30.4155	37.8216	0.314406	0.00815	0.0324862	no	1.2435
Treh	2R:16961529-16975734	34.5055	50.1865	0.540473	5e-05	0.000385856	no	1.45445
Trf2	X:8302040-8324228	7.09925	9.29186	0.3883	0.0064	0.0264715	no	1.30885
Trim9	2L:10544880-10627374	0.545209	2.24684	2.04301	0.00045	0.00277317	no	4.12106
Tsp29Fb	2L:8937389-8939746	0.780231	4.61541	2.56449	0.00835	0.03316	no	5.91544
tth	X:13506146-13510387	19.6108	25.8114	0.396365	0.0066	0.0271154	no	1.31618
ttk	3R:27539590-27561114	55.2356	79.4412	0.52429	5e-05	0.000385856	no	1.43822
tud	2R:17070936-17079903	41.141	58.7001	0.512785	5e-05	0.000385856	no	1.4268
TwdlT	3R:22853639-22889500	0.970404	4.81125	2.30975	0.0015	0.00795604	no	4.95799
twf	3R:9948379-9951252	28.1133	39.6148	0.494787	0.005	0.0216422	no	1.40911
Ubi-p63E	3L:3899258-3903138	117.278	157.408	0.424582	0.00045	0.00277317	no	1.34218
Unr	3L:8427148-8431786	25.8745	38.0252	0.555427	5e-05	0.000385856	no	1.4696
usnp	2R:19731005-19732248	44.2453	59.5552	0.428704	0.00285	0.0135779	no	1.34602
vib	3R:15043465-15052373	69.6076	87.5675	0.331152	0.0135	0.0488143	no	1.25802
vir-1	2L:12403269-12423421	48.6383	65.9109	0.438422	0.00475	0.0207066	no	1.35512
wal	2R:7576431-7578380	198.562	262.294	0.401593	0.00155	0.00817065	no	1.32097
wg	2L:7307160-7316255	25.7784	35.6529	0.467857	0.00035	0.00223239	no	1.38305
Wnt5	X:18395588-18399436	29.9758	38.3706	0.356203	0.00415	0.0185828	no	1.28005
X11Lbeta	X:10523347-10603712	0.258294	0.861725	1.73822	0.00155	0.00817065	no	3.33622
yata	3R:25574947-25579329	24.758	32.2754	0.382542	0.00455	0.02008	no	1.30364
zfh1	3R:26591647-26612899	7.89628	10.6444	0.43085	0.00855	0.0338601	no	1.34803
ZnT63C	3L:3303721-3313480	36.3425	52.8865	0.541242	0.0001	0.000742932	no	1.45522

## Sheet: Up at -18 hr
Table S4: genes significantly differentially regulated in w1118 leg imaginal discs between 18 hr before puparium formation and puparium formation (0 hr)
Sheet 2: genes significantly down-regulated at 0 hr
gene	locus	FPKM at -18 hr	FPKM at 0 hr	log2.fold_change.	p_value	q_value	Included in bioinformatic analyses? (>1.5 fold-change, > 5FPKM)	ActualFoldChange
AcCoAS	3L:21264305-21273343	8.12163	3.24538	-1.32338	5e-05	0.000385856	yes	0.399597
Acf1	3R:27619810-27630878	12.734	8.24526	-0.627046	0.0013	0.00701689	yes	0.6475
Acox57D-p	2R:17273858-17276788	9.94407	5.92211	-0.747726	5e-05	0.000385856	yes	0.595542
Act57B	2R:16831532-16833945	150.567	32.5159	-2.21119	5e-05	0.000385856	yes	0.215956
Act87E	3R:9251706-9253811	44.3391	16.2385	-1.44916	5e-05	0.000385856	yes	0.366234
ade2	2L:6038160-6045970	33.3214	21.8811	-0.606762	5e-05	0.000385856	yes	0.656668
ade3	2L:7014860-7023940	75.2177	38.8466	-0.953285	5e-05	0.000385856	yes	0.516456
aft	2R:13673641-13676914	49.8192	30.1476	-0.724659	5e-05	0.000385856	yes	0.60514
Ak6	2R:8453691-8457372	28.1279	16.05	-0.809433	5e-05	0.000385856	yes	0.570608
ald	3R:13497019-13499550	17.0975	9.21931	-0.891052	5e-05	0.000385856	yes	0.53922
Aldh	2L:9387388-9391679	24.6197	1.7409	-3.82191	5e-05	0.000385856	yes	0.0707117
Aldh-III	2R:3354383-3364667	77.502	31.8672	-1.28216	5e-05	0.000385856	yes	0.411179
ana	2R:4956605-4965059	55.9461	21.4651	-1.38205	5e-05	0.000385856	yes	0.383675
ana3	2R:8232590-8238583	11.3379	6.863	-0.724242	5e-05	0.000385856	yes	0.605315
Aos1	3R:8257046-8259626	203.699	129.406	-0.65453	0.0006	0.0035816	yes	0.63528
apt	2R:19452419-19488310	6.91322	2.21521	-1.64192	5e-05	0.000385856	yes	0.320431
armi	3L:3461322-3466314	28.1186	18.1974	-0.627796	5e-05	0.000385856	yes	0.647166
Art3	3R:11053326-11055161	46.6223	28.8602	-0.691937	5e-05	0.000385856	yes	0.619021
Art4	3R:5700402-5814598	65.6185	39.3018	-0.739509	5e-05	0.000385856	yes	0.598944
Art7	2R:18962591-18966559	19.6563	12.5831	-0.643507	0.0002	0.00137166	yes	0.640156
asf1	3L:19611964-19613498	75.6999	47.8973	-0.660346	5e-05	0.000385856	yes	0.632726
asp	3R:20579624-20586235	26.6952	10.4203	-1.35718	5e-05	0.000385856	yes	0.390344
ato	3R:4103513-4104996	14.8133	9.21406	-0.684981	0.00305	0.0143236	yes	0.622013
aur	3R:7788851-7790550	32.7046	14.3437	-1.18908	5e-05	0.000385856	yes	0.438584
bab1	3L:1036368-1101089	5.08135	3.30557	-0.620312	0.00055	0.0033225	yes	0.65053
baf	2L:8026913-8039788	407.418	255.297	-0.674333	0.0004	0.00250285	yes	0.626622
ball	3R:22690326-22692529	63.7782	34.4669	-0.887851	5e-05	0.000385856	yes	0.540418
barr	2L:20058163-20060975	67.5366	39.4195	-0.776759	5e-05	0.000385856	yes	0.583676
BEAF-32	2R:10657103-10660135	74.9493	49.9434	-0.585622	5e-05	0.000385856	yes	0.666362
beta4GalNAcTA	2R:10146536-10148655	8.34136	5.44059	-0.616519	0.00225	0.011173	yes	0.652243
Bj1	3L:5923361-5925873	103.331	59.0522	-0.807208	5e-05	0.000385856	yes	0.571486
bora	3L:18615793-18617855	8.52201	4.19908	-1.02112	0.00025	0.00166137	yes	0.492734
BthD	X:13506146-13510387	22.6106	9.336	-1.27612	0.0074	0.0299002	yes	0.412904
Bub3	3R:25498177-25501141	197.526	120.684	-0.710806	5e-05	0.000385856	yes	0.610978
BubR1	2R:1856599-1862122	29.764	14.893	-0.998932	5e-05	0.000385856	yes	0.50037
bun	2L:12456576-12546630	64.8495	35.2905	-0.877814	5e-05	0.000385856	yes	0.544191
bys	X:7795934-7797679	45.7406	30.3317	-0.59265	5e-05	0.000385856	yes	0.663124
Caf1	3R:11051288-11053286	242.66	160.504	-0.596332	5e-05	0.000385856	yes	0.661436
Caf1-105	2R:6353517-6355994	15.8357	8.33273	-0.926319	5e-05	0.000385856	yes	0.526199
Caf1-180	X:8496393-8500335	23.4931	13.1667	-0.835342	5e-05	0.000385856	yes	0.56045
CAP-D2	3R:25501397-25507763	45.3096	17.9274	-1.33765	5e-05	0.000385856	yes	0.395664
Cap-D3	2L:5525904-5539169	6.78733	3.55416	-0.933336	0.0045	0.0199106	yes	0.523646
Cap-G	2R:9020623-9030325	46.8023	25.4704	-0.877754	5e-05	0.000385856	yes	0.544213
Cda4	X:21985465-22034545	181.107	61.7137	-1.55318	5e-05	0.000385856	yes	0.340758
cdc2	2L:10384738-10386263	175.906	111.173	-0.661991	5e-05	0.000385856	yes	0.632002
cdc2c	3R:16561341-16564360	58.4054	30.0604	-0.958236	5e-05	0.000385856	yes	0.514685
CDC45L	X:907366-940075	38.9234	18.9353	-1.03956	0.0027	0.013008	yes	0.486476
Cenp-C	3R:4389847-4394970	16.2332	8.5509	-0.924802	5e-05	0.000385856	yes	0.526754
CG10126	3R:8681259-8684939	17.144	8.7036	-0.978018	0.0001	0.000742932	yes	0.507676
CG10191	3L:13381392-13383088	98.3559	42.8222	-1.19965	5e-05	0.000385856	yes	0.43538
CG10208	3R:19598714-19599845	6.25574	1.77212	-1.81971	0.0035	0.0160756	yes	0.283279
CG10211	2L:18517492-18531782	15.158	1.26107	-3.58736	5e-05	0.000385856	yes	0.083195
CG10237	2L:19435843-19441278	24.5364	2.04199	-3.58687	5e-05	0.000385856	yes	0.0832229
CG10249	2R:10788974-10815585	58.7533	37.6169	-0.643289	5e-05	0.000385856	yes	0.640252
CG10286	3R:2194675-2199747	48.9492	31.4211	-0.63955	0.00075	0.00436447	yes	0.641912
CG10336	2L:18689580-18695422	23.5022	10.3709	-1.18025	5e-05	0.000385856	yes	0.441274
CG10419	3L:19092222-19093434	16.4152	10.8783	-0.593577	0.00145	0.00771472	yes	0.662697
CG10444	2R:16159155-16162030	6.70175	3.32167	-1.01263	0.0001	0.000742932	yes	0.495642
CG10463	2L:19758878-19760986	20.7624	12.1481	-0.773237	5e-05	0.000385856	yes	0.585101
CG10527	2R:16957567-16960290	45.3253	19.9055	-1.18715	5e-05	0.000385856	yes	0.43917
CG10570	2L:18810035-18810986	30.6136	9.96911	-1.61864	5e-05	0.000385856	yes	0.325643
CG10585	3L:21020994-21023241	14.616	7.50976	-0.960711	5e-05	0.000385856	yes	0.513804
CG10722	2L:20093963-20096253	45.0205	29.924	-0.589277	5e-05	0.000385856	yes	0.664675
CG10863	3L:3941007-3942461	7.7431	3.53764	-1.13012	0.0083	0.032992	yes	0.456876
CG10877	3R:16386581-16398636	13.5932	3.63275	-1.90376	0.00025	0.00166137	yes	0.267248
CG10903	3R:3856550-3858669	29.3628	19.2305	-0.610594	0.0003	0.0019424	yes	0.654927
CG11033	3R:4878239-4890819	37.3107	19.0758	-0.967848	5e-05	0.000385856	yes	0.511269
CG11073	2R:17978993-17987231	6.40742	1.38912	-2.20557	5e-05	0.000385856	yes	0.216799
CG11092	X:13716835-13719943	77.0098	49.3059	-0.64328	5e-05	0.000385856	yes	0.640255
CG11120	3R:20748167-20750882	50.0145	20.7584	-1.26865	5e-05	0.000385856	yes	0.415048
CG11125	2R:3333693-3339056	10.6712	3.388	-1.65522	5e-05	0.000385856	yes	0.31749
CG11164	X:13562055-13563328	25.8508	12.8337	-1.01027	5e-05	0.000385856	yes	0.496453
CG11275	2R:18062412-18070337	197.06	23.3159	-3.07925	5e-05	0.000385856	yes	0.118319
CG11349	3L:4473067-4475095	5.75042	0.121857	-5.5604	0.0094	0.0365006	yes	0.021191
CG11357	3L:4542128-4553458	22.1851	12.6181	-0.814098	5e-05	0.000385856	yes	0.568765
CG11370	3L:22705256-22706763	156.647	13.1418	-3.57528	5e-05	0.000385856	yes	0.0838944
CG11403	X:1130905-1133925	20.4345	10.8318	-0.915732	5e-05	0.000385856	yes	0.530074
CG11436	X:4443102-4445913	16.2902	9.41904	-0.790348	5e-05	0.000385856	yes	0.578203
CG11563	3R:27562746-27563721	46.9875	27.3732	-0.779515	5e-05	0.000385856	yes	0.582563
CG11660	3L:11639328-11641761	10.2568	6.36892	-0.687457	5e-05	0.000385856	yes	0.620946
CG11788	2R:16162190-16166501	15.6487	7.65336	-1.03188	0.00225	0.011173	yes	0.489073
CG11837	3R:24875232-24876443	33.2242	17.8231	-0.898485	5e-05	0.000385856	yes	0.536449
CG11854	3R:21067770-21070884	47.7841	2.90391	-4.04046	5e-05	0.000385856	yes	0.0607715
CG11859	3R:21091565-21093479	27.4356	15.8149	-0.794769	5e-05	0.000385856	yes	0.576437
CG11920	3R:20900603-20902104	39.9313	23.5787	-0.760036	5e-05	0.000385856	yes	0.590482
CG12010	3L:3374307-3376649	9.0917	5.56564	-0.708001	0.0004	0.00250285	yes	0.612167
CG12018	3L:1775632-1777363	36.8909	17.3834	-1.08555	5e-05	0.000385856	yes	0.471211
CG12050	2L:21094960-21102392	27.7467	15.7023	-0.821337	5e-05	0.000385856	yes	0.565916
CG12065	X:8468336-8482561	10.7389	6.54936	-0.713422	0.0002	0.00137166	yes	0.609873
CG12179	X:4525084-4530028	8.36332	5.19884	-0.685885	5e-05	0.000385856	yes	0.621624
CG12268	3R:19769349-19774141	36.6466	5.93469	-2.62644	5e-05	0.000385856	yes	0.161944
CG12310	3L:15007794-15058077	96.033	33.3798	-1.52456	0.00045	0.00277317	yes	0.347587
CG12325	2R:6711104-6721741	18.4569	9.11423	-1.01796	5e-05	0.000385856	yes	0.493812
CG12702	X:19644832-19656356	31.7093	19.2415	-0.720683	0.0015	0.00795604	yes	0.606809
CG12821	2R:3719671-3723579	8.68609	5.28878	-0.715771	0.0117	0.0436128	yes	0.608879
CG12895	2R:6324176-6324864	49.9569	31.7629	-0.653342	0.00105	0.00585185	yes	0.635806
CG1299	3L:4148696-4152477	10.1582	3.06451	-1.72892	5e-05	0.000385856	yes	0.301678
CG13044	3L:16295590-16296260	262.581	17.7973	-3.88303	5e-05	0.000385856	yes	0.0677783
CG13067	3L:16264401-16265018	27.6156	0	#NAME?	5e-05	0.000385856	yes	0
CG13088	2L:8488958-8490546	9.65314	5.72891	-0.752737	0.0028	0.013362	yes	0.593476
CG13096	2L:8509250-8511844	124.248	81.4681	-0.608917	5e-05	0.000385856	yes	0.655689
CG13126	2L:9952427-9954180	12.5273	8.31007	-0.592148	0.0035	0.0160756	yes	0.663357
CG13350	2R:9867866-9870979	19.5439	7.31111	-1.41856	5e-05	0.000385856	yes	0.374087
CG13403	X:14085247-14086019	137.1	0.653222	-7.71344	0.00875	0.0343977	yes	0.00476457
CG13516	2R:18556960-18558127	16.8452	8.25473	-1.02905	5e-05	0.000385856	yes	0.490035
CG13568	2R:19936727-19945128	5.65071	2.65251	-1.09107	0.00055	0.0033225	yes	0.469412
CG1368	X:14068793-14069703	8.92692	2.57551	-1.7933	0.0108	0.0407905	yes	0.28851
CG13690	2L:415068-419642	20.5859	9.66988	-1.09009	0.00495	0.0214475	yes	0.469733
CG13731	3L:17377120-17382998	20.7142	0.34835	-5.89394	0.00025	0.00166137	yes	0.016817
CG13742	2R:4969941-4975062	9.71	5.36382	-0.856211	5e-05	0.000385856	yes	0.552402
CG13745	2R:4822077-4827299	12.097	4.88126	-1.30932	5e-05	0.000385856	yes	0.40351
CG1381	2R:5983984-5987091	107.11	61.1982	-0.807529	5e-05	0.000385856	yes	0.571358
CG13947	2L:779200-779655	18.7693	0	#NAME?	5e-05	0.000385856	yes	0
CG14230	X:19598192-19600375	16.3144	10.7875	-0.596788	0.00025	0.00166137	yes	0.661226
CG14258	3R:22918864-22919946	20.3712	0.286802	-6.15033	0.0006	0.0035816	yes	0.0140788
CG14332	3R:13247411-13247924	439.083	0.577484	-9.5705	0.00425	0.0189316	yes	0.0013152
CG14434	X:6745941-6746671	121.42	66.9996	-0.857777	5e-05	0.000385856	yes	0.5518
CG14544	3R:21885217-21888733	30.1123	19.1504	-0.65298	0.00025	0.00166137	yes	0.635966
CG14566	3L:21732578-21733409	30.4833	10.5906	-1.52523	0.0015	0.00795604	yes	0.347423
CG14572	3L:21734638-21735541	10.6942	0.418542	-4.67531	0.009	0.0352188	yes	0.0391373
CG14803	X:1759941-1766384	18.1607	9.05491	-1.00404	0.0001	0.000742932	yes	0.498599
CG14814	X:1756167-1759868	18.717	8.55914	-1.12881	5e-05	0.000385856	yes	0.457292
CG14984	3L:3951189-3952420	110.796	36.0896	-1.61825	5e-05	0.000385856	yes	0.32573
CG14997	3L:4240172-4242603	65.281	20.5059	-1.67063	5e-05	0.000385856	yes	0.314117
CG15093	2R:14663173-14664481	144.02	11.8945	-3.59791	5e-05	0.000385856	yes	0.0825892
CG15107	2R:14858813-14859943	26.523	12.7643	-1.05513	5e-05	0.000385856	yes	0.481254
CG15220	X:11509261-11509873	141.435	70.2496	-1.00957	5e-05	0.000385856	yes	0.496692
CG15282	2L:14712664-14713266	73.1418	30.9682	-1.23991	5e-05	0.000385856	yes	0.423399
CG15308	X:10112091-10113153	5.87037	0	#NAME?	5e-05	0.000385856	yes	0
CG15353	2L:2006762-2007193	1321.69	241.21	-2.45402	5e-05	0.000385856	yes	0.182501
CG1572	X:11449317-11452687	99.7677	31.7348	-1.65251	5e-05	0.000385856	yes	0.318087
CG15784	X:5324712-5326494	19.6702	9.74351	-1.0135	5e-05	0.000385856	yes	0.495344
CG15786	X:5190113-5201450	14.3449	9.41933	-0.606843	0.01245	0.0457908	yes	0.656633
CG1607	3R:27207831-27219249	226.281	132.628	-0.770735	5e-05	0.000385856	yes	0.586121
CG1622	X:13191131-13193943	58.4926	38.0443	-0.620574	5e-05	0.000385856	yes	0.650412
CG1648	2R:5698889-5707556	122.084	53.8229	-1.18158	5e-05	0.000385856	yes	0.440868
CG16708	3R:1184584-1194027	22.4157	7.46592	-1.58612	5e-05	0.000385856	yes	0.333067
CG1671	2R:5735567-5762577	40.4244	23.789	-0.764933	0.0003	0.0019424	yes	0.588481
CG16734	3R:5080773-5083438	28.9399	17.4725	-0.727974	5e-05	0.000385856	yes	0.603751
CG1681	X:13298788-13303249	26.9138	13.895	-0.953776	5e-05	0.000385856	yes	0.516278
CG16838	3L:16125127-16130979	12.4086	7.95121	-0.642088	5e-05	0.000385856	yes	0.640782
CG16884	2L:13914724-13955757	125.463	1.22096	-6.6831	5e-05	0.000385856	yes	0.00973163
CG16885	2L:13914724-13955757	133.942	9.88489	-3.76024	5e-05	0.000385856	yes	0.0737998
CG16892	X:9167449-9169387	48.7622	31.5605	-0.627642	5e-05	0.000385856	yes	0.647233
CG17032	3L:15951942-15953709	123.875	44.1144	-1.48956	5e-05	0.000385856	yes	0.35612
CG17104	2L:10677369-10679525	7.11708	1.779	-2.00022	5e-05	0.000385856	yes	0.249962
CG17325	2L:18813009-18813941	13.975	0.745611	-4.22828	0.00085	0.00486379	yes	0.0533532
CG17343	2L:19064976-19069850	59.4215	29.8674	-0.992412	0.0004	0.00250285	yes	0.502636
CG17362	3L:13979663-13980216	10.8514	0	#NAME?	5e-05	0.000385856	yes	0
CG17544	2L:19390368-19398492	51.0576	31.6893	-0.688128	5e-05	0.000385856	yes	0.620658
CG17843	3R:17739470-17741268	16.6396	2.12771	-2.96725	5e-05	0.000385856	yes	0.12787
CG18067	2R:16422014-16422860	17.0257	7.61901	-1.16003	0.0008	0.00462714	yes	0.447501
CG18135	3L:18983113-18993708	22.5592	11.3049	-0.996775	5e-05	0.000385856	yes	0.501121
CG18273	X:376809-381587	20.1114	12.2476	-0.715522	5e-05	0.000385856	yes	0.608988
CG18316	2R:3993930-3994878	33.8535	16.4138	-1.04439	5e-05	0.000385856	yes	0.484848
CG18410	3R:20617464-20625390	6.25404	0.305677	-4.35471	0.00015	0.00106015	yes	0.0488767
CG18431	2R:13390232-13396150	986.467	603.442	-0.709055	5e-05	0.000385856	yes	0.61172
CG2017	3R:1683798-1688133	31.8643	16.76	-0.926922	5e-05	0.000385856	yes	0.52598
CG2051	3R:1607483-1614796	68.3297	45.3925	-0.590059	5e-05	0.000385856	yes	0.664316
CG2126	3R:27600770-27602337	15.248	9.68958	-0.654115	0.00025	0.00166137	yes	0.635466
CG2129	X:8039886-8041888	9.6397	6.38962	-0.593259	0.00535	0.0228001	yes	0.662844
CG2321	3R:25312732-25315024	11.0982	7.09053	-0.646356	0.00485	0.0210996	yes	0.63889
Cg25C	2L:5029614-5037114	30.7812	6.32683	-2.28249	5e-05	0.000385856	yes	0.205542
CG2617	2L:20682369-20714589	18.3044	11.9547	-0.614612	0.00105	0.00585185	yes	0.653105
CG2691	X:13513372-13518439	37.5245	22.162	-0.759744	5e-05	0.000385856	yes	0.590601
CG2694	X:2608113-2614358	21.9647	10.1592	-1.11239	5e-05	0.000385856	yes	0.462524
CG2698	3R:3827281-3831432	39.8075	24.2183	-0.716943	5e-05	0.000385856	yes	0.608385
CG2875	X:3451844-3467653	38.237	24.8771	-0.620154	5e-05	0.000385856	yes	0.650603
CG2982	X:4213472-4215778	46.5773	28.1759	-0.725168	5e-05	0.000385856	yes	0.604928
CG30001	2R:5708067-5710539	13.8257	7.74969	-0.835138	5e-05	0.000385856	yes	0.560528
CG30085	2R:11751808-11756650	25.9684	12.1753	-1.0928	5e-05	0.000385856	yes	0.468851
CG30349	2R:4795024-4798390	62.5622	40.3404	-0.633066	5e-05	0.000385856	yes	0.644805
CG30383	2R:3711447-3712646	5.97133	1.73927	-1.77957	0.0012	0.00656818	yes	0.29127
CG3074	2R:18073482-18090178	18.3271	4.46202	-2.03821	0.0134	0.0485757	yes	0.243466
CG31028	3R:25992352-25996925	17.3554	5.2605	-1.72211	5e-05	0.000385856	yes	0.303105
CG31103	3R:21045068-21047095	7.16191	0.21128	-5.08312	0.0003	0.0019424	yes	0.0295005
CG31216	3R:15497182-15524272	7.77372	3.33854	-1.21939	5e-05	0.000385856	yes	0.429465
CG31301	3R:11171952-11173734	80.674	50.1177	-0.686782	5e-05	0.000385856	yes	0.621237
CG31368	3R:7708516-7719019	28.1334	18.4106	-0.611742	0.001	0.00561337	yes	0.654404
CG31445	3R:25066301-25070220	13.5269	4.88442	-1.46957	5e-05	0.000385856	yes	0.361089
CG31475	3R:15006382-15026820	6.24585	2.55255	-1.29096	5e-05	0.000385856	yes	0.408679
CG31607	2L:8134246-8159575	30.3544	10.5269	-1.52783	5e-05	0.000385856	yes	0.3468
CG31673	2L:20829607-20831063	30.3154	13.7816	-1.13731	5e-05	0.000385856	yes	0.454607
CG31705	2L:11523299-11528201	32.122	18.7925	-0.773405	5e-05	0.000385856	yes	0.585035
CG31918	2L:5055057-5058241	13.0001	5.49094	-1.24339	0.00805	0.0321325	yes	0.422377
CG32032	3L:9086153-9087956	8.54959	2.78034	-1.62059	0.00045	0.00277317	yes	0.325202
CG32038	3L:9444959-9445890	40.8717	24.3258	-0.748614	5e-05	0.000385856	yes	0.595175
CG32062	3L:10509104-10584067	29.7179	18.9481	-0.649283	5e-05	0.000385856	yes	0.637599
CG32082	3L:11129148-11156742	32.2736	18.5311	-0.800407	5e-05	0.000385856	yes	0.574188
CG32198	3L:18520089-18520500	14.4455	0	#NAME?	5e-05	0.000385856	yes	0
CG32248	3L:4471757-4472384	14.9109	0	#NAME?	5e-05	0.000385856	yes	0
CG32249	3L:4470000-4471032	49.8293	0.746557	-6.0606	0.0025	0.0122162	yes	0.0149823
CG32251	3L:4313634-4318473	9.06044	4.15742	-1.12389	5e-05	0.000385856	yes	0.458854
CG32344	3L:321231-324717	28.8567	17.4189	-0.728255	5e-05	0.000385856	yes	0.603635
CG32364	3L:8202676-8203771	11.7337	6.14741	-0.932605	0.0011	0.00608302	yes	0.523911
CG32425	3L:20490411-20507212	64.8304	39.7199	-0.706808	5e-05	0.000385856	yes	0.612674
CG32428	3L:20462773-20466801	38.6546	23.438	-0.721789	5e-05	0.000385856	yes	0.606344
CG3244	2L:4796583-4801923	37.7098	3.32778	-3.50231	5e-05	0.000385856	yes	0.0882471
CG32452	3L:22710838-22712845	14.2927	9.41364	-0.602458	0.00045	0.00277317	yes	0.658633
CG32603	X:14078573-14079840	10.0909	0	#NAME?	5e-05	0.000385856	yes	0
CG33099	3R:18354641-18356277	7.80001	3.33085	-1.22758	0.00075	0.00436447	yes	0.427032
CG33116	2L:19533472-19537365	29.2189	18.9986	-0.621008	5e-05	0.000385856	yes	0.650216
CG33333	3R:13243188-13243764	1197.71	1.98905	-9.23398	0.00015	0.00106015	yes	0.00166071
CG3335	3L:9617382-9624895	12.9132	7.73752	-0.738899	0.00025	0.00166137	yes	0.599195
CG33509	2L:21084604-21086506	8.94063	3.0066	-1.57224	5e-05	0.000385856	yes	0.336285
CG33671	2R:8521121-8523666	98.572	43.6433	-1.17542	5e-05	0.000385856	yes	0.442756
CG33970	3R:22144079-22187711	6.14438	3.92289	-0.647348	0.00395	0.0178364	yes	0.638452
CG34038	2R:21055456-21057283	8.55573	4.13124	-1.05032	0.0027	0.013008	yes	0.482862
CG34227	2R:7135630-7136117	487.162	8.22947	-5.88746	5e-05	0.000385856	yes	0.0168927
CG3430	2L:6957009-6960285	28.3432	13.1713	-1.1056	5e-05	0.000385856	yes	0.464708
CG34314	2L:2573423-2575080	11.0045	6.98567	-0.655628	0.00495	0.0214475	yes	0.634801
CG3523	2L:3056614-3068184	29.9344	15.229	-0.974979	5e-05	0.000385856	yes	0.508746
CG3588	X:2813802-2818416	5.82039	0.437109	-3.73505	5e-05	0.000385856	yes	0.0750996
CG3679	X:16197946-16202416	26.0636	15.6461	-0.736237	5e-05	0.000385856	yes	0.600305
CG3704	X:833201-834834	35.0365	19.1502	-0.871499	5e-05	0.000385856	yes	0.546579
CG3714	2L:4189496-4198058	14.3106	7.36025	-0.95926	5e-05	0.000385856	yes	0.514322
CG3756	2L:4969003-4971453	39.5804	24.7617	-0.676675	0.00145	0.00771472	yes	0.625605
CG3788	2R:18812612-18821208	21.7208	4.45901	-2.28428	0.00065	0.00383464	yes	0.205288
CG3808	3L:18983113-18993708	19.1933	9.33678	-1.03961	5e-05	0.000385856	yes	0.48646
CG3835	X:2035520-2038972	15.2222	6.7402	-1.17531	5e-05	0.000385856	yes	0.442788
CG3837	3R:10744401-10748027	13.9054	5.37403	-1.37157	5e-05	0.000385856	yes	0.386471
CG3964	2L:3862680-3867507	19.264	11.5504	-0.737962	5e-05	0.000385856	yes	0.599585
CG4038	2R:16979742-16988961	135.093	85.0542	-0.667496	5e-05	0.000385856	yes	0.629597
CG4069	3L:12527689-12530410	28.0558	17.4721	-0.683248	0.00025	0.00166137	yes	0.622762
CG4096	X:5593219-5611811	75.648	36.1467	-1.06544	5e-05	0.000385856	yes	0.477828
CG42307	3L:7322230-7326571	81.9424	47.3643	-0.790812	0.00225	0.011173	yes	0.578019
CG4239	X:16279347-16282736	6.85346	4.49541	-0.608379	0.01235	0.0455403	yes	0.655933
CG42487	3R:23783105-23784967	13.754	8.10091	-0.763696	0.0051	0.0219752	yes	0.588986
CG42500	3R:9977932-9978276	1086.09	156.479	-2.7951	5e-05	0.000385856	yes	0.144076
CG42514	3L:16412893-16516025	29.4271	5.73939	-2.35817	5e-05	0.000385856	yes	0.195038
CG42550	3R:3825591-3827031	56.947	35.778	-0.670545	0.0025	0.0122162	yes	0.628268
CG42575	3L:11116460-11127763	27.8497	7.12117	-1.96748	5e-05	0.000385856	yes	0.2557
CG42761	3R:9433770-9434112	6.67535	0	#NAME?	5e-05	0.000385856	yes	0
CG42798	3R:13232705-13233256	14.7467	7.24471	-1.02539	0.0036	0.0164643	yes	0.491277
CG42835	3R:13246359-13246686	11.0208	0	#NAME?	5e-05	0.000385856	yes	0
CG4351	X:12990124-12995964	11.9771	6.42394	-0.89875	5e-05	0.000385856	yes	0.536352
CG4406	X:1901936-1903376	41.7146	25.8715	-0.689188	5e-05	0.000385856	yes	0.620203
CG4449	3R:19075164-19077199	15.3804	9.52492	-0.691319	5e-05	0.000385856	yes	0.619289
CG4542	X:6715051-6716873	29.8859	19.7213	-0.599713	0.0011	0.00608302	yes	0.659886
CG4619	2L:9938864-9947442	16.4359	10.3369	-0.669044	0.0037	0.0168318	yes	0.628922
CG4730	3R:21491530-21504403	9.01147	5.93991	-0.601322	0.00835	0.03316	yes	0.65915
CG4747	2L:10003824-10008889	147.791	97.1306	-0.605559	5e-05	0.000385856	yes	0.657216
CG4771	3R:18566951-18571294	8.15532	3.79354	-1.1042	5e-05	0.000385856	yes	0.465161
CG4797	2R:19699703-19705849	17.0463	11.1881	-0.607486	0.00045	0.00277317	yes	0.656336
CG4849	3R:23789137-23792680	39.3696	25.6101	-0.620369	5e-05	0.000385856	yes	0.650504
CG4935	2L:16262122-16263483	11.8036	7.1252	-0.72822	0.0041	0.0183974	yes	0.603646
CG5018	3L:16219221-16221789	16.7191	9.18519	-0.864113	5e-05	0.000385856	yes	0.549383
CG5023	3R:15995157-16000597	12.1212	0.580598	-4.38385	0.00235	0.0116091	yes	0.0478994
CG5033	2R:13677196-13679953	50.5919	31.3805	-0.689038	5e-05	0.000385856	yes	0.620267
CG5114	3L:14975947-14977592	52.2553	28.7189	-0.863576	5e-05	0.000385856	yes	0.549588
CG5116	3R:21308887-21314810	15.5395	8.95615	-0.794992	5e-05	0.000385856	yes	0.576347
CG5151	3L:16132599-16142113	41.9441	27.6197	-0.602768	5e-05	0.000385856	yes	0.658488
CG5167	3R:8232253-8233824	32.0079	20.9378	-0.612319	0.00075	0.00436447	yes	0.654145
CG5177	2L:7405213-7408475	28.759	5.55349	-2.37255	5e-05	0.000385856	yes	0.193104
CG5191	3R:16386581-16398636	17.187	6.29737	-1.44849	5e-05	0.000385856	yes	0.366403
CG5235	3L:16080726-16083487	22.5647	12.6519	-0.834713	5e-05	0.000385856	yes	0.560694
CG5317	2L:12056323-12058251	120.144	76.0036	-0.660621	5e-05	0.000385856	yes	0.632604
CG5359	3R:5823260-5826998	18.9989	10.8086	-0.813741	5e-05	0.000385856	yes	0.568907
CG5391	3R:18158809-18159872	19.8529	4.50264	-2.1405	5e-05	0.000385856	yes	0.2268
CG5498	3L:20375504-20377194	37.6326	21.4067	-0.813916	5e-05	0.000385856	yes	0.568834
CG5508	3R:23750914-23763571	17.2705	11.0731	-0.641251	0.00895	0.0350873	yes	0.641157
CG5524	3R:20014769-20019145	10.8381	6.82415	-0.667392	5e-05	0.000385856	yes	0.629644
CG5535	3L:17845723-17849864	35.1931	20.6126	-0.771769	5e-05	0.000385856	yes	0.5857
CG5589	3L:17795589-17797813	11.683	6.59677	-0.824578	5e-05	0.000385856	yes	0.564647
CG5602	2R:19778060-19782510	27.8533	13.5749	-1.03691	5e-05	0.000385856	yes	0.487371
CG5656	3L:21435322-21437914	10.218	0.876504	-3.54321	5e-05	0.000385856	yes	0.0857804
CG5664	3L:21431723-21434423	11.7751	7.72805	-0.607559	0.0002	0.00137166	yes	0.656304
CG5728	3R:20144740-20159036	24.7792	16.3445	-0.600322	0.00645	0.0266268	yes	0.659606
CG5757	2R:13981232-13982212	40.6063	17.2182	-1.23777	5e-05	0.000385856	yes	0.424028
CG5776	2L:12701425-12704423	9.53191	5.60903	-0.765013	5e-05	0.000385856	yes	0.588448
CG5857	3R:19750124-19753354	58.2177	32.4499	-0.843243	5e-05	0.000385856	yes	0.557389
CG5866	3R:13241467-13242196	13.8668	0	#NAME?	5e-05	0.000385856	yes	0
CG5924	2L:9890884-9893419	7.30685	3.12734	-1.22431	0.00015	0.00106015	yes	0.428001
CG5946	3L:11810082-11815375	54.4698	34.7454	-0.648635	5e-05	0.000385856	yes	0.637884
CG6041	X:5842222-5844241	19.5502	11.0303	-0.825706	0.00155	0.00817065	yes	0.564204
CG6045	3R:11368473-11373457	32.0585	7.33888	-2.12707	5e-05	0.000385856	yes	0.228922
CG6073	3R:21996570-22014526	16.9834	11.182	-0.602956	0.0011	0.00608302	yes	0.658408
CG6126	3R:12023723-12028802	5.19432	2.44491	-1.08715	0.00455	0.02008	yes	0.470689
CG6310	3L:11062142-11062953	29.9168	19.6664	-0.605218	0.01185	0.0440569	yes	0.65737
CG6425	3R:22540883-22543107	10.886	6.4391	-0.757544	5e-05	0.000385856	yes	0.591503
CG6490	3R:22296824-22360939	13.5217	7.66863	-0.818232	5e-05	0.000385856	yes	0.567135
CG6643	3R:20370440-20382271	5.86595	0.388367	-3.91687	5e-05	0.000385856	yes	0.066207
CG6739	2L:7608389-7616528	11.0086	4.93506	-1.1575	5e-05	0.000385856	yes	0.448291
CG6767	3L:9676675-9689793	98.5884	32.0795	-1.61977	5e-05	0.000385856	yes	0.325388
CG6854	3L:15091236-15106079	107.89	70.5004	-0.613859	5e-05	0.000385856	yes	0.653447
CG7016	3R:20688653-20690502	5.57861	1.61027	-1.79261	0.0021	0.0105629	yes	0.288651
CG7102	2L:7883467-7887489	25.4297	12.1454	-1.06611	5e-05	0.000385856	yes	0.477607
CG7110	2L:13398988-13411152	26.292	17.4562	-0.590885	5e-05	0.000385856	yes	0.663936
CG7194	3L:8295463-8297159	5.73584	2.32478	-1.30291	0.00085	0.00486379	yes	0.405308
CG7246	X:8972855-8975091	18.698	10.7077	-0.804232	5e-05	0.000385856	yes	0.572666
CG7265	3R:10718113-10719675	50.4196	29.0658	-0.794665	5e-05	0.000385856	yes	0.576478
CG7296	2L:10686390-10686988	39.4995	1.04054	-5.24643	0.00425	0.0189316	yes	0.0263431
CG7326	X:18755575-18757749	7.10314	4.57975	-0.633187	0.00285	0.0135779	yes	0.64475
CG7338	3L:21328317-21336816	42.4287	25.2712	-0.74755	0.0006	0.0035816	yes	0.595616
CG7376	3L:6167347-6174883	9.06911	5.94686	-0.608832	0.0029	0.0137702	yes	0.655727
CG7433	3L:19990813-19993786	5.47971	2.51419	-1.12401	5e-05	0.000385856	yes	0.458818
CG7465	3L:4480281-4481487	166.783	0.618576	-8.0748	0.0014	0.00748122	yes	0.00370887
CG7516	2L:14352593-14355080	19.8051	12.7048	-0.640503	5e-05	0.000385856	yes	0.641491
CG7544	2R:11035381-11037214	9.81995	4.85792	-1.01538	5e-05	0.000385856	yes	0.494699
CG7593	3R:25548882-25550651	42.237	20.3901	-1.05063	0.00145	0.00771472	yes	0.482754
CG7627	2L:8355673-8361198	27.1724	14.7393	-0.882473	5e-05	0.000385856	yes	0.542436
CG7741	2R:7189425-7195070	9.14842	5.67941	-0.687781	0.0127	0.0465106	yes	0.620808
CG7800	3R:4043699-4045456	6.87913	3.66631	-0.907896	5e-05	0.000385856	yes	0.532961
CG7900	3R:3919845-3930805	26.0103	14.9332	-0.800555	5e-05	0.000385856	yes	0.574126
CG8005	3L:8191308-8192591	22.2281	14.3595	-0.630382	0.00115	0.00632685	yes	0.646007
CG8064	3R:14109383-14114499	26.6867	16.527	-0.691293	5e-05	0.000385856	yes	0.619297
CG8097	X:15477193-15479058	13.5145	6.97174	-0.954914	5e-05	0.000385856	yes	0.515871
CG8142	X:17736207-17738700	40.554	22.2773	-0.864272	0.0003	0.0019424	yes	0.549324
CG8173	X:17601433-17603691	38.0828	24.3044	-0.647923	5e-05	0.000385856	yes	0.638199
CG8177	3L:9756651-9779365	6.90331	3.10929	-1.1507	5e-05	0.000385856	yes	0.450406
CG8193	2R:4929764-4932213	17.8883	1.34552	-3.73278	5e-05	0.000385856	yes	0.0752179
CG8247	2R:4802032-4810256	13.6524	7.72422	-0.821692	0.0076	0.0306216	yes	0.565777
CG8436	3R:5084690-5086122	47.0573	28.9572	-0.700497	5e-05	0.000385856	yes	0.61536
CG8468	2R:10107424-10122953	76.6312	30.855	-1.31243	5e-05	0.000385856	yes	0.402643
CG8478	3R:5589371-5595749	44.1848	18.6025	-1.24805	5e-05	0.000385856	yes	0.421016
CG8486	2L:8163297-8190044	10.9811	6.93887	-0.662252	5e-05	0.000385856	yes	0.631892
CG8490	2R:8222821-8223710	32.9095	21.1467	-0.638073	0.0027	0.013008	yes	0.642571
CG8547	2R:10148710-10155419	62.8866	5.72843	-3.45654	5e-05	0.000385856	yes	0.0910914
CG8664	X:17175809-17176744	9.53215	0	#NAME?	5e-05	0.000385856	yes	0
CG8709	2R:4024823-4044128	20.2405	13.3461	-0.600827	0.0078	0.0313097	yes	0.659376
CG8740	2R:4623323-4647095	43.9731	25.6284	-0.778876	5e-05	0.000385856	yes	0.58282
CG8888	2R:7952067-7967046	9.90752	0.447671	-4.46801	0.00045	0.00277317	yes	0.045185
CG9008	2L:13774339-13780163	11.8255	3.16756	-1.90046	5e-05	0.000385856	yes	0.267858
CG9080	2R:7129249-7129700	28.9741	0.910316	-4.99225	0.0053	0.0226999	yes	0.0314183
CG9134	3L:1256451-1274498	23.8603	12.1595	-0.972524	5e-05	0.000385856	yes	0.509612
CG9147	2L:6066185-6067635	28.291	17.843	-0.664987	0.0019	0.00972246	yes	0.630695
CG9253	2L:21143226-21148546	100.451	64.5843	-0.637234	5e-05	0.000385856	yes	0.642943
CG9328	2L:20797716-20814030	13.6781	6.6759	-1.03483	5e-05	0.000385856	yes	0.488072
CG9336	2L:20859168-20861017	61.2454	34.7805	-0.816325	0.0002	0.00137166	yes	0.567888
CG9338	2L:20865226-20867311	56.8342	5.62378	-3.33715	5e-05	0.000385856	yes	0.0989506
CG9422	2R:2561113-2580099	43.8837	28.4223	-0.626658	0.0131	0.0476495	yes	0.647673
CG9576	X:20054385-20056763	8.55504	2.79686	-1.61297	5e-05	0.000385856	yes	0.326925
CG9593	3R:11627865-11629261	14.3482	8.79239	-0.706539	0.00865	0.0341456	yes	0.612787
CG9674	3L:16780914-16800828	51.2531	22.4109	-1.19344	5e-05	0.000385856	yes	0.437259
CG9740	3R:5083448-5084223	73.4227	45.0001	-0.706298	5e-05	0.000385856	yes	0.612891
CG9747	3R:26011141-26016799	73.8369	32.2414	-1.19543	5e-05	0.000385856	yes	0.436657
CG9757	3R:9437587-9438151	8.09987	0	#NAME?	5e-05	0.000385856	yes	0
CG9759	3R:9434474-9434968	36.5727	0	#NAME?	5e-05	0.000385856	yes	0
CG9772	3R:160838-165640	37.3796	21.1138	-0.824062	0.00355	0.0162791	yes	0.564848
CG9799	3R:9211369-9214436	33.113	21.3075	-0.63604	5e-05	0.000385856	yes	0.643478
CG9850	2R:19641217-19685240	16.4376	1.93348	-3.08773	5e-05	0.000385856	yes	0.117625
CG9921	X:16225294-16226322	14.6544	9.4424	-0.63411	0.00205	0.0103601	yes	0.644339
CG9932	2L:13022670-13060115	11.5075	3.07509	-1.90388	5e-05	0.000385856	yes	0.267225
CG9990	3R:24501076-24521661	27.2962	10.516	-1.37612	5e-05	0.000385856	yes	0.385255
Chd3	3L:19440274-19443338	5.80259	3.60047	-0.688513	0.00125	0.00677261	yes	0.620494
cher	3R:12913988-12948404	86.5438	56.029	-0.627258	5e-05	0.000385856	yes	0.647406
Chit	2R:12560965-12618889	41.3823	13.4364	-1.62287	0.0079	0.0316517	yes	0.32469
Cht7	3L:3090984-3106956	23.9635	5.27532	-2.18351	5e-05	0.000385856	yes	0.22014
cid	2R:9373105-9374136	8.64945	2.7846	-1.63514	0.00045	0.00277317	yes	0.32194
ckd	3L:3258154-3267845	6.86489	3.34461	-1.0374	0.00075	0.00436447	yes	0.487205
Cks30A	2L:9330766-9331981	83.9595	20.3188	-2.04688	5e-05	0.000385856	yes	0.242007
cmet	2L:11210680-11269179	16.7473	8.11277	-1.04566	5e-05	0.000385856	yes	0.484423
cnn	2R:9326818-9337990	21.0554	10.6747	-0.979992	5e-05	0.000385856	yes	0.506982
Cp110	X:21884236-21909502	12.2571	7.09027	-0.7897	0.00535	0.0228001	yes	0.578462
Cpr51A	2R:10400046-10402713	25.3483	3.25225	-2.96238	5e-05	0.000385856	yes	0.128302
Cpr56F	2R:16175859-16179448	9.47641	1.2418	-2.9319	5e-05	0.000385856	yes	0.131041
Cpr57A	2R:16435871-16437597	23.1486	11.8455	-0.966585	0.00985	0.0378703	yes	0.511716
Cpr64Aa	3L:4207837-4209178	93.7766	1.77469	-5.72359	5e-05	0.000385856	yes	0.0189247
Cpr67B	3L:9397894-9399280	17.6653	0.85956	-4.36117	5e-05	0.000385856	yes	0.0486581
Cpr78E	3L:21659553-21660080	218.709	61.863	-1.82187	5e-05	0.000385856	yes	0.282855
Cralbp	3L:5773144-5779741	18.0443	7.34808	-1.2961	0.0001	0.000742932	yes	0.407224
Csl4	2L:11122563-11130645	21.0416	10.6464	-0.982875	0.01385	0.0498693	yes	0.505969
cutlet	2L:3707229-3711722	8.6922	3.62097	-1.26335	5e-05	0.000385856	yes	0.416577
CycB	2R:18691025-18694490	142.275	75.0843	-0.922094	5e-05	0.000385856	yes	0.527741
CycB3	3R:20694074-20696617	45.3773	22.8639	-0.988899	5e-05	0.000385856	yes	0.503862
CycE	2L:15727761-15748155	17.8257	10.4923	-0.764633	5e-05	0.000385856	yes	0.588605
Cyp310a1	2L:18617256-18661787	48.5986	3.26466	-3.89591	5e-05	0.000385856	yes	0.067176
Cyp6u1	2R:2859616-2862638	17.4227	9.87641	-0.818913	5e-05	0.000385856	yes	0.56687
Cyp9c1	2R:20502943-20526110	39.1312	21.6615	-0.853185	5e-05	0.000385856	yes	0.553561
D12	2L:8434057-8437346	8.38464	4.90048	-0.774826	0.0003	0.0019424	yes	0.584459
dah	X:15222378-15236144	17.6288	6.28445	-1.48807	0.00075	0.00436447	yes	0.356488
dap	2R:5599827-5603607	40.5424	16.9487	-1.25826	5e-05	0.000385856	yes	0.418049
Dbp73D	3L:16721595-16723910	12.9885	7.65934	-0.761945	5e-05	0.000385856	yes	0.589702
Det	3R:12975390-12976177	63.191	39.0234	-0.695379	5e-05	0.000385856	yes	0.617547
dgt6	3R:24954305-24956651	26.229	17.4108	-0.591181	0.0002	0.00137166	yes	0.6638
dl	2L:17410656-17450360	18.0961	11.4357	-0.662133	0.00975	0.0375702	yes	0.631943
Dll	2R:20702352-20722686	106.074	65.5486	-0.694437	5e-05	0.000385856	yes	0.617952
DNApol-alpha180	3R:17492274-17497472	20.3093	9.81638	-1.04888	5e-05	0.000385856	yes	0.483344
DNApol-alpha50	3L:8333419-8337504	10.7521	4.44435	-1.27457	5e-05	0.000385856	yes	0.413347
DNApol-alpha60	3L:20352932-20354673	28.2085	10.563	-1.41711	5e-05	0.000385856	yes	0.374462
DNApol-alpha73	3R:23064902-23066950	15.8343	5.63578	-1.49037	5e-05	0.000385856	yes	0.355922
DNApol-delta	3L:15976220-15980911	19.2293	8.14393	-1.23951	5e-05	0.000385856	yes	0.423517
DNApol-epsilon	3R:19173912-19180890	10.7957	4.14326	-1.38161	5e-05	0.000385856	yes	0.383788
DNApol-eta	3L:21927808-21934882	8.43813	5.4021	-0.643403	0.0001	0.000742932	yes	0.640201
dnk	3R:14807122-14808500	51.4436	20.0817	-1.35711	5e-05	0.000385856	yes	0.390363
Dp	2R:9107828-9115714	102.023	67.1302	-0.603866	5e-05	0.000385856	yes	0.657991
dpa	2R:3384205-3387379	88.9089	34.856	-1.35092	5e-05	0.000385856	yes	0.392042
Dph5	3R:18406496-18408950	144.938	79.7383	-0.862089	0.0001	0.000742932	yes	0.550155
dre4	3L:1871573-1876336	136.455	85.5175	-0.674139	5e-05	0.000385856	yes	0.626708
dup	2R:11264123-11275362	25.7026	12.5124	-1.03855	0.0028	0.013362	yes	0.486815
dUTPase	2L:11011331-11012138	768.002	390.029	-0.977529	5e-05	0.000385856	yes	0.507849
ea	3R:11154451-11156135	31.1869	17.969	-0.795431	0.0001	0.000742932	yes	0.576171
EcR	2R:1977923-2056681	21.0148	12.1057	-0.79572	5e-05	0.000385856	yes	0.576056
Edg91	3R:13436577-13437233	24.6889	1.77246	-3.80004	5e-05	0.000385856	yes	0.0717918
Eip74EF	3L:17553257-17612407	19.2667	5.62867	-1.77524	5e-05	0.000385856	yes	0.292145
emp	2R:20864126-20872321	107.267	62.8162	-0.771996	5e-05	0.000385856	yes	0.585606
esc	2L:11814825-11928570	16.6015	8.03784	-1.04643	0.00295	0.0139381	yes	0.484163
Fancd2	3R:16636524-16641923	13.0433	6.23361	-1.06517	5e-05	0.000385856	yes	0.477917
fau	3R:6593887-6603090	55.5626	12.1678	-2.19105	5e-05	0.000385856	yes	0.218993
Fbw5	2L:6063017-6065949	6.74736	3.49746	-0.948014	0.00215	0.0107701	yes	0.518345
Fen1	2R:12737962-12742843	49.0863	24.1865	-1.02112	5e-05	0.000385856	yes	0.492734
feo	X:10746477-10748907	105.788	65.0882	-0.700713	5e-05	0.000385856	yes	0.61527
Fib	2R:18960413-18962243	348.689	194.188	-0.844486	5e-05	0.000385856	yes	0.556909
FK506-bp1	3R:11156461-11158864	373.998	216.988	-0.785414	5e-05	0.000385856	yes	0.580185
fru	3R:14242314-14371308	39.7259	3.24154	-3.61533	5e-05	0.000385856	yes	0.0815976
Fuca	3L:11506666-11513921	7.32213	4.52782	-0.693445	0.01055	0.0400582	yes	0.618375
fz3	X:664060-677344	44.5306	28.6652	-0.635495	5e-05	0.000385856	yes	0.643719
fzy	2L:16310928-16326101	96.9825	56.0598	-0.790757	5e-05	0.000385856	yes	0.57804
gammaTub23C	2L:2972891-2976859	68.215	42.3242	-0.688606	5e-05	0.000385856	yes	0.620453
geminin	2R:2542967-2543955	184.038	121.332	-0.601043	5e-05	0.000385856	yes	0.659277
Gen	3L:5135054-5145447	12.9015	7.61747	-0.760154	0.0009	0.00512934	yes	0.590433
Gld	3R:3077770-3091423	5.13182	1.40457	-1.86935	5e-05	0.000385856	yes	0.273698
glu	2L:16732563-16738372	29.7773	13.47	-1.14446	5e-05	0.000385856	yes	0.452358
Gnf1	3R:732347-735803	35.6177	22.4516	-0.665778	5e-05	0.000385856	yes	0.63035
Gpo-1	2R:11745255-11750251	6.6938	3.63806	-0.879657	0.00805	0.0321325	yes	0.543497
Grip71	2L:18708848-18713763	24.0436	15.4649	-0.636655	5e-05	0.000385856	yes	0.643202
Gs2	X:11316887-11324228	26.8982	6.44318	-2.06166	5e-05	0.000385856	yes	0.239539
hd	3R:1198313-1200353	15.0211	7.2527	-1.0504	5e-05	0.000385856	yes	0.482834
hdc	3R:26103655-26187891	38.3262	18.2069	-1.07384	5e-05	0.000385856	yes	0.475051
HmgD	2R:17600835-17604230	1308.69	815.733	-0.681952	5e-05	0.000385856	yes	0.62332
Hmr	X:10484951-10489849	11.2297	7.43633	-0.594651	0.0001	0.000742932	yes	0.662202
hoip	2L:9699790-9700459	363.916	234.261	-0.63549	5e-05	0.000385856	yes	0.643723
Hydr1	2R:5019991-5025455	12.4887	4.66208	-1.42158	0.0004	0.00250285	yes	0.373304
ial	2L:10856787-10858082	92.4057	39.3062	-1.23323	5e-05	0.000385856	yes	0.425366
Idgf3	2L:16450906-16453176	14.7924	3.99606	-1.8882	5e-05	0.000385856	yes	0.270143
Idgf4	X:9822298-9825012	288.891	180.243	-0.680582	5e-05	0.000385856	yes	0.623914
Incenp	2R:3165971-3169066	108.237	65.2396	-0.73037	5e-05	0.000385856	yes	0.602748
Ir	3R:18999594-19047683	25.7837	14.2695	-0.853526	0.00105	0.00585185	yes	0.553431
Irbp	3R:7235770-7238162	10.2845	5.54886	-0.890203	0.00015	0.00106015	yes	0.539536
Jheh2	2R:14743271-14745443	220.336	125.698	-0.809742	5e-05	0.000385856	yes	0.570483
Jon65Aiii	3L:6043873-6044800	28.3947	1.25103	-4.50443	0.00305	0.0143236	yes	0.0440586
Jon65Aiv	3L:6032256-6033248	69.7706	3.98171	-4.13116	5e-05	0.000385856	yes	0.0570686
jumu	3R:6175905-6187343	48.5071	13.8371	-1.80966	5e-05	0.000385856	yes	0.285259
Karybeta3	3R:474944-480360	146.718	91.529	-0.680741	5e-05	0.000385856	yes	0.623843
ken	2R:19757797-19764965	16.0232	3.6704	-2.12615	5e-05	0.000385856	yes	0.229068
Klp61F	3L:1235728-1245935	50.5213	24.908	-1.02028	5e-05	0.000385856	yes	0.49302
Klp67A	3L:9355207-9360040	30.8899	13.0398	-1.24421	5e-05	0.000385856	yes	0.422138
Kmn1	X:11464656-11466475	24.0627	13.9238	-0.78925	0.00295	0.0139381	yes	0.578647
l(1)1Bi	X:523815-529760	26.478	17.2867	-0.615133	0.0013	0.00701689	yes	0.65287
l(1)G0020	X:8608983-8614276	36.6047	22.5993	-0.695753	0.00015	0.00106015	yes	0.617388
l(2)01810	2L:12027439-12034123	13.6536	8.40943	-0.699198	5e-05	0.000385856	yes	0.615913
l(2)dtl	2R:19590001-19592926	21.1269	12.0462	-0.810505	5e-05	0.000385856	yes	0.570183
l(2)efl	2R:19570903-19573063	62.92	4.01733	-3.96921	5e-05	0.000385856	yes	0.0638482
l(2)k09022	2L:6854169-6860864	23.8128	15.6024	-0.609971	5e-05	0.000385856	yes	0.655211
l(3)07882	3R:13361408-13365698	22.7244	14.1484	-0.683602	5e-05	0.000385856	yes	0.622608
l(3)neo26	3L:18814272-18815454	42.0307	17.0974	-1.29767	5e-05	0.000385856	yes	0.406784
LamC	2R:10414075-10472826	40.2295	11.119	-1.85523	5e-05	0.000385856	yes	0.276389
LBR	2R:17608001-17611564	80.1885	44.9546	-0.834928	5e-05	0.000385856	yes	0.560612
Lcp1	2R:4318138-4318737	1965.22	22.5126	-6.44781	5e-05	0.000385856	yes	0.0114555
Lcp2	2R:4321471-4322080	292.867	5.1077	-5.84143	5e-05	0.000385856	yes	0.0174403
Lcp3	2R:4322948-4323523	221.968	3.35563	-6.04762	5e-05	0.000385856	yes	0.0151176
Lcp4	2R:4325161-4325908	516.793	8.44146	-5.93595	5e-05	0.000385856	yes	0.0163343
Lcp65Ac	3L:6137923-6138493	6.15833	0	#NAME?	5e-05	0.000385856	yes	0
Lcp9	2R:20667557-20667892	138.125	2.69086	-5.68177	0.00665	0.0272946	yes	0.0194813
lok	2L:20061476-20065675	36.4589	24.0987	-0.597316	0.0002	0.00137166	yes	0.660983
Lsp1alpha	X:12384415-12386933	17.6453	3.08299	-2.51688	5e-05	0.000385856	yes	0.17472
Lsp1beta	2L:898646-901320	73.0984	20.8148	-1.81223	5e-05	0.000385856	yes	0.28475
Lsp1gamma	3L:66438-69003	36.0185	9.06374	-1.99056	5e-05	0.000385856	yes	0.251641
M(2)21AB	2L:106902-114433	149.168	76.5243	-0.962951	5e-05	0.000385856	yes	0.513007
mad2	3L:5804072-5806183	63.8488	39.9641	-0.675957	0.0016	0.0083929	yes	0.625918
mars	2R:9382726-9393516	44.0642	16.372	-1.42838	5e-05	0.000385856	yes	0.371549
Mat89Ba	3R:12092733-12098145	17.5005	11.3239	-0.628031	5e-05	0.000385856	yes	0.647062
mbm	2L:271911-277212	18.3017	8.18472	-1.16098	5e-05	0.000385856	yes	0.447211
Mcm10	2L:21179940-21198745	9.42676	3.88224	-1.27987	5e-05	0.000385856	yes	0.411832
Mcm2	3R:4090564-4093653	55.4415	22.1203	-1.3256	5e-05	0.000385856	yes	0.398985
Mcm3	X:5217880-5223383	73.7708	32.3536	-1.18912	5e-05	0.000385856	yes	0.438569
Mcm5	3R:6614249-6616898	62.7871	21.8187	-1.5249	5e-05	0.000385856	yes	0.347503
Mcm6	X:6568421-6571205	94.8363	43.4801	-1.12509	5e-05	0.000385856	yes	0.458475
Mcm7	3L:8884709-8887435	102.497	40.2818	-1.34739	5e-05	0.000385856	yes	0.393005
mei-38	X:1371126-1372515	17.6678	6.6176	-1.41674	5e-05	0.000385856	yes	0.374557
mei-S332	2R:17994242-18012071	12.6487	7.31461	-0.790134	0.00435	0.0193168	yes	0.578289
Mes4	2R:18299311-18300087	26.1617	13.5782	-0.946166	5e-05	0.000385856	yes	0.519011
Mes-4	3R:23750914-23763571	27.3851	16.1149	-0.765	5e-05	0.000385856	yes	0.588455
Mf	3R:10996346-11006143	30.4164	0.755918	-5.33047	5e-05	0.000385856	yes	0.0248523
Mgat2	3R:25841226-25847980	12.2144	6.15598	-0.988525	5e-05	0.000385856	yes	0.503994
Mhc	2L:16766736-16788766	6.77353	0.205071	-5.04571	5e-05	0.000385856	yes	0.0302754
mia	3R:1374046-1376889	5.01646	1.41231	-1.82861	5e-05	0.000385856	yes	0.281535
Mlc1	3R:23483284-23485921	23.6348	0.910634	-4.6979	5e-05	0.000385856	yes	0.0385294
Mlc2	3R:25997159-26000273	23.1616	1.70103	-3.76725	5e-05	0.000385856	yes	0.0734418
Mlh1	2R:4055451-4059907	14.1504	5.22219	-1.43811	5e-05	0.000385856	yes	0.369049
Mlp60A	2R:19962535-19965746	56.8328	2.48544	-4.51515	0.00055	0.0033225	yes	0.0437325
mms4	2R:6698598-6700835	9.86926	3.70942	-1.41175	0.0011	0.00608302	yes	0.375856
Mp20	2R:9134156-9135278	40.0414	3.63881	-3.45995	5e-05	0.000385856	yes	0.0908762
mrj	2R:12090826-12109301	21.1556	13.4467	-0.653785	5e-05	0.000385856	yes	0.635609
msb1l	2L:19577704-19580346	78.7168	35.8443	-1.13493	5e-05	0.000385856	yes	0.455358
msd1	3L:1331728-1333152	56.9101	32.1823	-0.822416	0.00135	0.00725477	yes	0.565494
Msh6	3L:15140239-15151684	22.6024	9.25603	-1.28801	5e-05	0.000385856	yes	0.409515
msi	3R:21344044-21434849	27.3968	17.6161	-0.637117	5e-05	0.000385856	yes	0.642998
mu2	3L:1941061-1947513	10.405	5.72202	-0.86268	5e-05	0.000385856	yes	0.54993
mud	X:14141875-14152633	27.7174	18.3449	-0.595411	5e-05	0.000385856	yes	0.661855
mus101	X:13616321-13621145	9.55077	6.01414	-0.66726	5e-05	0.000385856	yes	0.629702
mus209	2R:16149256-16150362	402.806	215.53	-0.902199	5e-05	0.000385856	yes	0.535071
nahoda	2R:18783695-18804247	36.1669	21.7561	-0.733249	5e-05	0.000385856	yes	0.601547
ncd	3R:25628918-25632849	82.3065	37.0328	-1.1522	5e-05	0.000385856	yes	0.449938
Ndc80	X:13503697-13506009	22.2889	10.0572	-1.1481	5e-05	0.000385856	yes	0.45122
neb	2L:20075756-20091220	15.716	8.49349	-0.887809	0.00215	0.0107701	yes	0.540436
net	2L:82455-87382	8.43075	3.24438	-1.37772	5e-05	0.000385856	yes	0.384827
Nle	2L:564169-568162	39.9764	21.6395	-0.885483	5e-05	0.000385856	yes	0.541307
Nnf1a	2R:16473726-16474758	69.2573	40.7505	-0.765151	5e-05	0.000385856	yes	0.588393
nod	X:11474850-11479787	23.3711	12.2416	-0.932935	5e-05	0.000385856	yes	0.523792
Nop60B	2R:20062249-20073866	211.448	123.597	-0.774661	5e-05	0.000385856	yes	0.584527
Nox	2R:12197071-12203725	14.1719	5.2284	-1.43859	5e-05	0.000385856	yes	0.368927
Npc2b	3R:9915244-9918149	25.272	6.50087	-1.95884	5e-05	0.000385856	yes	0.257236
Nplp4	2L:2008459-2008966	80.6874	2.40113	-5.07056	0.00125	0.00677261	yes	0.0297584
Nup133	3R:18516249-18520494	37.3276	22.8787	-0.706237	5e-05	0.000385856	yes	0.612916
Nup154	2L:11004822-11011085	50.2026	32.6005	-0.622868	5e-05	0.000385856	yes	0.649379
Nup160	2L:11122563-11130645	39.7285	20.8832	-0.927832	5e-05	0.000385856	yes	0.525648
Nup214	2R:18806458-18812255	43.9278	28.4629	-0.62605	5e-05	0.000385856	yes	0.647947
Nup58	3R:15470749-15472628	30.347	18.2521	-0.733495	5e-05	0.000385856	yes	0.601447
nxf2	3L:16569958-16573387	12.8869	7.79795	-0.724735	5e-05	0.000385856	yes	0.605107
Obp56d	2R:15590634-15591300	649.487	40.9659	-3.9868	5e-05	0.000385856	yes	0.0630742
Obp99a	3R:25497381-25498056	256.576	154.478	-0.731985	5e-05	0.000385856	yes	0.602075
ome	3L:14665967-14740971	22.3818	8.77526	-1.35081	5e-05	0.000385856	yes	0.392071
Orc1	2R:3406784-3413213	14.02	6.91086	-1.02055	0.0014	0.00748122	yes	0.492929
Orc2	3R:9790638-9792803	19.8124	6.67831	-1.56885	5e-05	0.000385856	yes	0.337077
Orc4	2R:20683262-20684927	30.9092	17.4806	-0.82228	5e-05	0.000385856	yes	0.565547
Orc6	2R:5730191-5733964	9.32843	3.93952	-1.24361	0.0029	0.0137702	yes	0.422313
Oseg1	3L:8398531-8404675	20.5495	13.0417	-0.655967	5e-05	0.000385856	yes	0.634648
Ote	2R:14163111-14164698	131.772	63.8992	-1.04417	5e-05	0.000385856	yes	0.484922
pav	3L:4242735-4246236	72.3379	27.4532	-1.39778	5e-05	0.000385856	yes	0.379513
pbl	3L:7889213-7905051	38.6491	20.1751	-0.93786	5e-05	0.000385856	yes	0.522007
Pen	2L:10056905-10060095	273.288	177.427	-0.623192	5e-05	0.000385856	yes	0.649231
Pepck	2R:14424271-14426924	62.8386	21.2763	-1.5624	5e-05	0.000385856	yes	0.338586
Pfrx	X:19389537-19403390	19.0122	11.0546	-0.782281	5e-05	0.000385856	yes	0.581448
phtf	2R:2629371-2633649	15.959	10.4356	-0.612864	5e-05	0.000385856	yes	0.653901
pie	2L:10420710-10422781	6.68005	2.91129	-1.1982	0.00035	0.00223239	yes	0.435819
pim	2L:10362988-10364046	34.7465	22.8675	-0.603566	0.0001	0.000742932	yes	0.658124
pinta	3R:18249026-18250447	19.768	11.7619	-0.749042	0.0004	0.00250285	yes	0.594997
pit	3R:17857871-17864114	53.3596	35.5476	-0.585997	0.00085	0.00486379	yes	0.666189
pita	2R:19435762-19442241	57.1638	28.5245	-1.0029	0.0003	0.0019424	yes	0.498996
plx	3R:1511853-1538559	8.06582	4.3352	-0.895724	5e-05	0.000385856	yes	0.537478
Pmi	3L:5773144-5779741	7.42959	4.14113	-0.843259	0.00015	0.00106015	yes	0.557383
pncr003:2L	2L:16838592-16841887	13.2689	0.342831	-5.2744	0.0002	0.00137166	yes	0.0258372
pncr004:X	X:19065109-19068929	16.3555	6.04265	-1.43652	0.0001	0.000742932	yes	0.369457
Pole2	3L:5888784-5890479	23.4116	9.882	-1.24435	5e-05	0.000385856	yes	0.422098
polo	3L:20303104-20306566	177.238	112.902	-0.650621	5e-05	0.000385856	yes	0.637008
por	X:18271553-18273884	30.7332	20.1237	-0.610899	5e-05	0.000385856	yes	0.654787
ppan	3R:16941957-16944571	32.1216	19.4214	-0.725895	0.00085	0.00486379	yes	0.604621
ppk13	2L:21086899-21088730	20.0098	7.90534	-1.33981	5e-05	0.000385856	yes	0.395073
Prm	3L:8725957-8738447	8.13278	0.372659	-4.44782	5e-05	0.000385856	yes	0.0458218
proPO-A1	2R:13761451-13813097	6.00211	0.808881	-2.89147	5e-05	0.000385856	yes	0.134766
Psf2	2L:4386175-4387046	17.4281	10.3537	-0.751266	0.00065	0.00383464	yes	0.594081
pwn	2R:3182812-3187907	63.6815	32.5492	-0.968251	5e-05	0.000385856	yes	0.511125
Rab27	X:1367916-1370963	26.719	6.56457	-2.02509	5e-05	0.000385856	yes	0.245689
rad50	2R:18308543-18312979	14.2455	8.94986	-0.67057	5e-05	0.000385856	yes	0.628259
RanGap	2L:19442040-19447322	98.6433	49.4043	-0.997585	5e-05	0.000385856	yes	0.500838
Rbm13	X:8795721-8797511	52.9529	32.534	-0.702761	5e-05	0.000385856	yes	0.614395
rdgBbeta	2R:13583280-13585866	5.77073	3.54774	-0.701854	0.0102	0.038919	yes	0.614782
RecQ4	3L:8163918-8168998	7.11061	3.11142	-1.1924	5e-05	0.000385856	yes	0.437574
RecQ5	3L:14615909-14625173	9.51932	5.27043	-0.852939	0.00675	0.0276125	yes	0.553656
RfC3	2L:10419189-10420612	34.7816	11.7361	-1.56737	5e-05	0.000385856	yes	0.337423
RfC38	2L:11122563-11130645	38.3946	22.3112	-0.783134	0.002	0.0101613	yes	0.581103
RfC4	3L:4134852-4136039	105.655	47.7628	-1.1454	5e-05	0.000385856	yes	0.452064
Rh50	3L:4910385-4919044	5.05993	1.29907	-1.96164	0.0006	0.0035816	yes	0.256737
RhoGAP54D	2R:13473929-13478387	23.992	14.0577	-0.771195	5e-05	0.000385856	yes	0.585933
RhoGEF4	3L:7313169-7316509	68.4849	26.2752	-1.38208	5e-05	0.000385856	yes	0.383664
rig	2R:16521380-16528191	33.8367	18.9702	-0.834849	5e-05	0.000385856	yes	0.56064
RluA-2	2L:10477113-10482975	9.76371	6.1637	-0.663634	0.00025	0.00166137	yes	0.631287
RnrL	2L:10325017-10327986	92.1324	40.2863	-1.19342	5e-05	0.000385856	yes	0.437265
RnrS	2R:7870645-7872948	167.613	59.8138	-1.48658	5e-05	0.000385856	yes	0.356857
rod	3R:27401556-27413861	26.3074	12.1367	-1.11609	5e-05	0.000385856	yes	0.461342
RPA2	2L:20924974-20926144	122.227	52.124	-1.22954	5e-05	0.000385856	yes	0.426452
RpA-70	3R:4087841-4090171	100.678	51.9083	-0.955707	5e-05	0.000385856	yes	0.515587
Rpb7	3R:11044983-11048849	48.7084	27.7245	-0.813009	0.00095	0.00537497	yes	0.569193
RpI1	2R:10478707-10488702	24.9189	13.8876	-0.843447	5e-05	0.000385856	yes	0.557312
RpI12	3R:17601859-17603510	14.0585	8.78199	-0.678827	0.0062	0.0258062	yes	0.624675
RpI135	2L:404285-414775	17.4589	9.20657	-0.923225	0.0024	0.0118288	yes	0.527328
Rpp30	2L:251162-252331	44.8249	28.7041	-0.643042	5e-05	0.000385856	yes	0.640361
Rrp46	3R:6239022-6241766	31.8925	19.139	-0.736703	0.0002	0.00137166	yes	0.60011
Rs1	2R:4052389-4055274	38.0183	24.9203	-0.609372	5e-05	0.000385856	yes	0.655482
Rtc1	X:13651209-13652631	35.5344	19.1641	-0.890815	5e-05	0.000385856	yes	0.539311
SA	2L:6950439-6956872	32.376	20.0964	-0.687985	5e-05	0.000385856	yes	0.620719
Sas-4	3R:2977075-2979886	21.4966	13.6023	-0.660255	5e-05	0.000385856	yes	0.632765
scra	2R:3477623-3482759	91.2692	55.3258	-0.722177	5e-05	0.000385856	yes	0.606183
scramb2	3L:3042374-3046810	146.319	79.7694	-0.875209	5e-05	0.000385856	yes	0.545175
sda	3R:22741454-22771035	14.5729	9.06571	-0.684793	5e-05	0.000385856	yes	0.622094
Sgs3	3L:11505320-11506503	21.0892	4.84862	-2.12086	5e-05	0.000385856	yes	0.22991
Sgs5	3R:13421083-13421834	24.9681	8.1858	-1.60889	5e-05	0.000385856	yes	0.32785
Sgs7	3L:11502960-11503347	352.658	225.811	-0.643153	0.00225	0.011173	yes	0.640312
Sip1	2R:13282100-13292678	185.675	72.2087	-1.36253	5e-05	0.000385856	yes	0.388898
sip2	2L:6960425-6964073	98.5181	43.6626	-1.17399	5e-05	0.000385856	yes	0.443194
Slbp	3R:24977792-24978969	69.4249	35.9043	-0.951295	5e-05	0.000385856	yes	0.517167
Sld5	3R:21881367-21882213	31.7899	17.6446	-0.849343	0.00075	0.00436447	yes	0.555038
sle	3R:6158892-6163995	40.0009	24.8843	-0.684796	5e-05	0.000385856	yes	0.622094
SMC2	2R:10736093-10740155	36.3677	17.0108	-1.09621	5e-05	0.000385856	yes	0.467745
smid	3L:7374952-7378742	113.442	67.4394	-0.750285	5e-05	0.000385856	yes	0.594484
SNF4Agamma	3R:16966462-17038409	34.4766	15.6588	-1.13864	5e-05	0.000385856	yes	0.454186
Sodh-2	3R:6702105-6705041	6.42368	2.55781	-1.32849	0.01025	0.0390924	yes	0.398185
sofe	X:10749173-10751415	13.9126	8.21891	-0.759374	0.00015	0.00106015	yes	0.590753
SP1173	3L:6682424-6696619	21.7452	2.87154	-2.9208	5e-05	0.000385856	yes	0.132054
Spc105R	3L:20793642-20799958	13.4665	6.70844	-1.00533	5e-05	0.000385856	yes	0.498158
spd-2	3L:16580432-16588142	43.5975	18.961	-1.20121	5e-05	0.000385856	yes	0.43491
SpdS	3R:5457360-5463329	44.2413	23.4322	-0.916899	5e-05	0.000385856	yes	0.529645
spel1	2L:14362067-14365568	26.912	12.0192	-1.16291	5e-05	0.000385856	yes	0.446611
Spindly	2L:3525132-3530317	32.8934	21.1157	-0.639484	5e-05	0.000385856	yes	0.641943
spn-B	3R:10153785-10155330	5.24171	2.08402	-1.33067	0.00695	0.0283089	yes	0.397584
Sptr	X:8355508-8359030	12.3264	8.13832	-0.598952	0.00065	0.00383464	yes	0.660235
spz3	2L:7873494-7879550	9.23415	4.45732	-1.0508	5e-05	0.000385856	yes	0.4827
ste14	3L:13011350-13012788	27.4268	15.6129	-0.812847	0.0002	0.00137166	yes	0.569257
stg	3R:25077539-25081502	37.4818	16.9987	-1.14076	5e-05	0.000385856	yes	0.453519
sti	3L:12501089-12507889	43.8942	15.1153	-1.53802	5e-05	0.000385856	yes	0.344358
sub	2R:13631605-13635616	20.8967	7.00925	-1.57594	5e-05	0.000385856	yes	0.335424
Sug	3L:11677083-11684499	14.7898	8.38528	-0.818676	5e-05	0.000385856	yes	0.566964
tefu	3R:11057933-11067958	14.5702	8.98746	-0.697035	5e-05	0.000385856	yes	0.616838
thr	2R:13748303-13753397	10.3261	5.26171	-0.972694	5e-05	0.000385856	yes	0.509554
timeout	3R:8914372-8989598	13.3404	5.87775	-1.18247	5e-05	0.000385856	yes	0.440598
Timp	3R:6016410-6047805	7.5773	3.92058	-0.950617	0.00275	0.0131821	yes	0.517411
tld	3R:20575455-20579234	15.71	2.47875	-2.664	5e-05	0.000385856	yes	0.157782
Tm2	3R:11135914-11140920	17.1452	0.546665	-4.971	5e-05	0.000385856	yes	0.0318844
tok	3R:20545418-20574855	75.636	39.0538	-0.95361	5e-05	0.000385856	yes	0.516339
Top2	2L:19447361-19453507	184.686	113.272	-0.705278	5e-05	0.000385856	yes	0.613322
Top3alpha	2L:19498178-19502268	14.0126	7.80149	-0.844905	5e-05	0.000385856	yes	0.556748
tos	2L:18677202-18683717	7.47601	3.70285	-1.01363	5e-05	0.000385856	yes	0.495298
TpnC73F	3L:17039263-17041490	37.4247	5.47649	-2.77267	5e-05	0.000385856	yes	0.146334
Trap1	2R:2521151-2523767	31.9264	20.9062	-0.610817	5e-05	0.000385856	yes	0.654825
Ts	2L:2954761-2969620	43.3513	17.9807	-1.26963	5e-05	0.000385856	yes	0.414767
Tsf1	X:18281964-18284377	46.1248	15.104	-1.61061	5e-05	0.000385856	yes	0.327459
Tsp42Ee	2R:2899760-2905869	248.197	141.293	-0.812796	5e-05	0.000385856	yes	0.569278
Tsp74F	3L:17884919-17888954	16.781	8.86049	-0.921368	5e-05	0.000385856	yes	0.528007
tum	2R:9743654-9746222	76.3063	23.4798	-1.70038	5e-05	0.000385856	yes	0.307705
up	X:13487609-13496536	21.2663	0.683897	-4.95865	5e-05	0.000385856	yes	0.0321587
uzip	2R:20899572-20917609	22.9352	15.2415	-0.589561	5e-05	0.000385856	yes	0.664546
vkg	2L:5012143-5027412	23.6389	3.76735	-2.64954	5e-05	0.000385856	yes	0.159371
wdp	2R:18185717-18199425	31.5372	18.5509	-0.765567	5e-05	0.000385856	yes	0.588223
WRNexo	3R:14187715-14191898	21.692	7.07098	-1.61718	5e-05	0.000385856	yes	0.325972
wupA	X:17999585-18010855	21.4237	1.50663	-3.82981	5e-05	0.000385856	yes	0.0703254
yellow-b	2L:16754335-16758283	19.8027	7.17456	-1.46474	5e-05	0.000385856	yes	0.362302
yellow-e	3R:9235263-9241006	8.55078	2.06945	-2.04681	5e-05	0.000385856	yes	0.242019
Zasp66	3L:8617472-8631773	24.2197	5.6962	-2.08811	5e-05	0.000385856	yes	0.235189
zormin	3L:2117465-2150089	27.0428	12.997	-1.05706	5e-05	0.000385856	yes	0.480609
zwilch	3R:27036684-27039072	24.347	12.8899	-0.9175	5e-05	0.000385856	yes	0.529425
2019-09-05	2R:3847637-3849427	22.8616	16.209	-0.496127	0.002	0.0101613	no	0.709005
A3-3	X:1136772-1168682	2.50732	0.388331	-2.69079	5e-05	0.000385856	no	0.154879
abo	2L:10973441-10975273	14.1653	9.82406	-0.527969	0.0054	0.022956	no	0.69353
Ac3	2L:21632598-21647967	3.51514	1.70644	-1.04259	0.0006	0.0035816	no	0.485454
Adgf-C	3R:9532478-9534854	0.777355	0	#NAME?	5e-05	0.000385856	no	0
Adk2	2R:19911720-19913400	288.973	229.085	-0.335049	0.00615	0.0256355	no	0.792756
Ady43A	2R:3130528-3133263	43.9747	34.9374	-0.331901	0.01275	0.0466737	no	0.794489
Ag5r2	X:14676984-14678075	0.670186	0	#NAME?	0.00015	0.00106015	no	0
alphaPS5	2R:19444332-19447720	3.3246	1.23383	-1.43004	0.00115	0.00632685	no	0.371121
Antp	3R:2721974-2824950	12.4877	9.74038	-0.358457	0.01135	0.0425861	no	0.779998
AP-2	3L:21591957-21606453	88.6414	61.4029	-0.529672	5e-05	0.000385856	no	0.692711
Apc2	3R:19989689-19995283	24.912	16.9997	-0.551335	0.0107	0.04052	no	0.68239
APC4	X:8976667-8979900	13.2027	9.1347	-0.531404	0.001	0.00561337	no	0.691881
app	3L:12199337-12259889	11.6119	8.81229	-0.398021	0.0069	0.0281454	no	0.758902
Arp8	X:17751006-17754840	16.4956	11.543	-0.515066	0.00425	0.0189316	no	0.699762
Art1	3R:6612202-6613930	201.461	135.175	-0.575668	5e-05	0.000385856	no	0.670974
asrij	2R:18773920-18776374	40.3459	28.5021	-0.501356	0.01165	0.0435021	no	0.706444
ast	2L:1077979-1080809	16.617	12.616	-0.397412	0.01155	0.0432041	no	0.759222
B52	3R:9487021-9492613	682.866	469.047	-0.541869	5e-05	0.000385856	no	0.68688
Bap170	2R:2524022-2529866	38.8852	27.4355	-0.503176	5e-05	0.000385856	no	0.705551
Bap55	2R:13316853-13318440	152.017	113.853	-0.417059	0.00085	0.00486379	no	0.748949
BCL7-like	X:9250678-9252627	49.9299	36.1637	-0.465359	0.0004	0.00250285	no	0.724289
Best1	3R:5987185-5996207	15.6543	10.7149	-0.546943	0.00015	0.00106015	no	0.68447
BM-40-SPARC	3R:22694953-22697738	106.915	78.1158	-0.452777	0.00185	0.00951778	no	0.730635
bnb	X:18682498-18700217	952.785	712.858	-0.418536	0.00025	0.00166137	no	0.748183
borr	2L:9251471-9291798	127.253	86.5861	-0.555491	0.0003	0.0019424	no	0.680425
by	3R:5353959-5358734	15.9839	11.836	-0.433437	0.0037	0.0168318	no	0.740495
Cap-H2	3R:6587031-6593668	16.2589	12.0782	-0.428824	0.0096	0.0371258	no	0.742867
Cas	2L:16802020-16826991	107.687	76.6781	-0.48996	0.0001	0.000742932	no	0.712046
CD98hc	3R:3800127-3803488	492.813	402.524	-0.291963	0.01315	0.0478111	no	0.816789
cdc16	3R:19106954-19111763	23.6802	18.3094	-0.371098	0.00925	0.0360653	no	0.773194
Cdk4	2R:12466980-12472953	77.783	59.7924	-0.379492	0.0052	0.022361	no	0.768708
Cdk7	X:5201497-5202970	34.9351	24.7114	-0.4995	0.0019	0.00972246	no	0.707352
Cep135	3L:15109838-15124478	18.1152	12.1922	-0.571243	0.00015	0.00106015	no	0.673037
cg	2R:10061174-10070345	65.2558	47.0225	-0.472754	0.00025	0.00166137	no	0.720587
CG10080	2R:17512539-17518766	27.4415	19.5267	-0.490915	0.0002	0.00137166	no	0.711576
CG10139	2R:10532775-10533676	52.6982	36.4437	-0.532085	0.0002	0.00137166	no	0.691555
CG10341	2L:18698685-18703118	33.2932	22.5699	-0.560825	0.0022	0.0109821	no	0.677913
CG10376	2L:18698685-18703118	14.6366	10.0203	-0.546654	0.00995	0.0381521	no	0.684606
CG10414	2L:18609571-18612242	14.2452	10.6261	-0.422858	0.0076	0.0306216	no	0.745942
CG10424	3L:19089498-19090809	60.7247	44.3422	-0.453603	0.00265	0.0128393	no	0.730217
CG10445	3R:3742320-3745833	3.29028	1.91246	-0.782783	0.0014	0.00748122	no	0.581245
CG10535	3R:7476709-7481062	27.3699	20.8575	-0.392028	0.00455	0.02008	no	0.76206
CG10559	3R:21140215-21141838	2.37694	0.762389	-1.6405	0.00615	0.0256355	no	0.320744
CG10628	2L:19757242-19758613	21.2244	14.9079	-0.509652	0.012	0.044441	no	0.702394
CG10932	X:7781299-7782785	81.6856	62.4372	-0.387677	0.0047	0.0205724	no	0.76436
CG10981	3R:1650326-1652298	15.221	10.618	-0.519555	0.00175	0.0090577	no	0.697589
CG11030	2L:5724657-5760047	38.5581	28.4906	-0.436551	0.00535	0.0228001	no	0.738901
CG11107	2R:3274718-3280666	100.108	76.7989	-0.382402	0.00165	0.00860773	no	0.76716
CG11136	2R:16534112-16548432	19.5099	13.9064	-0.488458	0.00075	0.00436447	no	0.712787
CG11155	4:1147232-1156547	2.30532	1.47622	-0.643061	0.0071	0.0287967	no	0.640354
CG11267	3L:13009156-13010007	365.568	253.485	-0.528241	5e-05	0.000385856	no	0.6934
CG11309	3L:21295375-21297562	14.271	9.5856	-0.574146	0.00095	0.00537497	no	0.671684
CG11334	3R:27284101-27288730	92.4412	68.0916	-0.441061	0.0008	0.00462714	no	0.736594
CG11353	3L:4533171-4539281	3.36892	0.115207	-4.86999	0.0002	0.00137166	no	0.034197
CG11399	3L:20771894-20779306	22.9616	15.7838	-0.540777	0.00065	0.00383464	no	0.6874
CG11417	X:1248075-1250513	22.3964	15.115	-0.567283	0.00015	0.00106015	no	0.674885
CG11456	3L:20835100-20878288	12.9126	9.40757	-0.456889	0.0128	0.0468167	no	0.728557
CG11529	3L:12190890-12192130	3.68383	0.855693	-2.10604	0.00255	0.012418	no	0.232284
CG11679	X:15631521-15632942	26.725	18.2639	-0.549195	0.00115	0.00632685	no	0.683401
CG11811	3L:10684116-10685701	24.1223	17.9943	-0.422827	0.0022	0.0109821	no	0.745961
CG11851	3R:21047314-21049840	21.0027	15.3937	-0.448233	0.00235	0.0116091	no	0.732939
CG11875	3R:21073599-21074828	56.0698	39.9573	-0.488766	0.0018	0.00928843	no	0.712635
CG11943	X:19746248-19753412	56.6087	40.2148	-0.493297	0.0001	0.000742932	no	0.7104
CG12134	2R:5858653-5860295	28.4839	21.5453	-0.402775	0.0125	0.0458762	no	0.756403
CG12159	2R:3802533-3803968	53.965	36.4184	-0.567357	0.00085	0.00486379	no	0.674852
CG1218	3R:1617607-1620053	37.2173	26.1223	-0.510689	0.0108	0.0407905	no	0.701886
CG12253	2L:10987816-10989241	19.3026	13.6737	-0.497391	0.00475	0.0207066	no	0.708386
CG12299	2L:10736318-10740762	50.9472	34.5986	-0.558288	5e-05	0.000385856	no	0.679107
CG12301	3L:15573941-15576473	11.9611	9.15236	-0.386132	0.0103	0.0392656	no	0.765177
CG1234	3R:3069895-3072717	28.2615	20.5474	-0.459878	0.0011	0.00608302	no	0.727046
CG12499	3R:18266022-18272254	14.2884	10.1998	-0.486307	0.0004	0.00250285	no	0.713852
CG12506	2L:773574-774020	0.938899	0	#NAME?	0.00275	0.0131821	no	0
CG12643	X:10158256-10159290	39.2395	29.4082	-0.416085	0.00555	0.023512	no	0.749454
CG12728	X:5836640-5838655	9.75561	6.87391	-0.505101	0.00845	0.033495	no	0.704611
CG12909	2R:6197628-6198648	47.3196	31.8933	-0.569185	0.00055	0.0033225	no	0.673998
CG13051	3L:16257812-16258192	4.3635	0	#NAME?	0.00165	0.00860773	no	0
CG13059	3L:16316771-16317408	4.49546	0	#NAME?	5e-05	0.000385856	no	0
CG13089	2L:8515097-8517377	63.7737	47.7689	-0.416891	0.0096	0.0371258	no	0.749038
CG13090	2L:8517445-8519180	28.4292	20.0652	-0.502679	0.001	0.00561337	no	0.705795
CG13097	2L:8512168-8514864	23.8674	17.9173	-0.413689	0.00375	0.0170321	no	0.750702
CG1311	3L:4277963-4282798	77.4766	54.5708	-0.505631	0.0004	0.00250285	no	0.704352
CG13185	2R:7755380-7772951	7.74667	5.22292	-0.568719	5e-05	0.000385856	no	0.674215
CG13319	2R:8811408-8812169	79.6334	60.2996	-0.401226	0.0111	0.0417945	no	0.757215
CG13506	2R:18270640-18281527	18.2657	12.735	-0.520332	0.00025	0.00166137	no	0.697208
CG13599	3R:19757364-19758450	16.2753	10.8699	-0.582351	0.00405	0.0182112	no	0.667877
CG13604	3R:19814527-19818638	27.1804	18.8744	-0.526134	0.00015	0.00106015	no	0.694412
CG13624	3R:20385001-20408577	4.66384	2.19574	-1.08681	5e-05	0.000385856	no	0.470801
CG13636	3R:20659675-20666217	3.06204	0.701714	-2.12554	0.0002	0.00137166	no	0.229166
CG13894	3L:693087-699143	4.63037	1.61907	-1.51596	0.00025	0.00166137	no	0.349663
CG13900	3L:826709-833402	164.774	130.774	-0.333419	0.00625	0.0259765	no	0.793657
CG13933	3L:1771808-1775143	12.5102	9.08677	-0.46126	0.00225	0.011173	no	0.726349
CG13957	X:16208037-16211646	10.7702	7.8296	-0.460032	0.004	0.0180527	no	0.726969
CG14231	X:19594102-19595786	26.607	18.4287	-0.529855	0.00345	0.01588	no	0.692626
CG1427	3R:1427154-1428909	34.4534	25.6914	-0.42336	0.00355	0.0162791	no	0.745685
CG14304	3R:14418739-14447049	1.8386	0.118765	-3.95243	0.0016	0.0083929	no	0.0645953
CG14561	3L:22059041-22060067	31.7061	22.5724	-0.4902	0.0057	0.0240286	no	0.711926
CG14696	3R:6708154-6710723	26.1646	17.7073	-0.563275	0.0011	0.00608302	no	0.676766
CG14749	2R:4515381-4517691	17.3331	12.8443	-0.432401	0.00545	0.0231227	no	0.741027
CG14786	X:1351207-1354591	42.2439	32.2482	-0.389522	0.00665	0.0272946	no	0.763381
CG14795	X:1406259-1406832	2.70155	0	#NAME?	0.0001	0.000742932	no	0
CG14879	3R:12171854-12174946	2.14656	0.872915	-1.29812	0.00275	0.0131821	no	0.406658
CG14969	3L:3330141-3334978	24.9908	19.4649	-0.360516	0.01305	0.0475686	no	0.778883
CG15019	3L:4403499-4406059	102.727	76.2023	-0.430908	0.00435	0.0193168	no	0.741794
CG1529	X:20899673-20902977	8.30394	6.02161	-0.463647	0.00325	0.0150892	no	0.725151
CG15414	2L:3480754-3491048	4.9382	0.867016	-2.50985	0.0002	0.00137166	no	0.175573
CG1542	3R:27039131-27040510	64.1425	44.9957	-0.511495	0.00015	0.00106015	no	0.701496
CG15514	3R:25685776-25687197	37.5072	28.8586	-0.378167	0.01205	0.0445684	no	0.769415
CG15597	3R:2110180-2110922	1.25804	0	#NAME?	5e-05	0.000385856	no	0
CG1578	X:11703387-11710565	28.6558	21.5954	-0.408103	0.003	0.0141431	no	0.753614
CG15879	3L:2167549-2169108	3.3903	1.18293	-1.51905	0.00475	0.0207066	no	0.348916
CG1620	2R:3381310-3383971	60.6825	45.3003	-0.421761	0.001	0.00561337	no	0.746513
CG1640	X:13264638-13274193	48.9132	38.5188	-0.34466	0.00915	0.0357731	no	0.787493
CG16700	X:16985886-16992520	5.10162	3.60272	-0.501869	0.0135	0.0488143	no	0.706191
CG16820	2L:13246230-13250193	3.53145	1.18111	-1.58012	0.00415	0.0185828	no	0.334455
CG16857	2L:4324572-4331837	2.19635	0.569398	-1.9476	0.00175	0.0090577	no	0.259247
CG16936	2R:20650686-20655697	302.019	238.361	-0.341492	0.01335	0.0484354	no	0.789225
CG17107	2L:10681974-10682383	2.80146	0	#NAME?	0.00285	0.0135779	no	0
CG1718	X:21163740-21171389	2.47542	0.479825	-2.36709	5e-05	0.000385856	no	0.193836
CG17273	3R:16650377-16656337	101.63	81.2476	-0.32293	0.0117	0.0436128	no	0.799445
CG1737	X:11244666-11249331	29.7118	23.0396	-0.366917	0.00465	0.0204057	no	0.775436
CG17508	2R:1496128-1499094	35.7414	27.3339	-0.386906	0.00655	0.0269747	no	0.764769
CG17698	3L:23731057-23742158	15.7551	12.0163	-0.39083	0.0079	0.0316517	no	0.762693
CG17807	2R:18501834-18523435	21.2193	15.766	-0.428558	0.00865	0.0341456	no	0.743003
CG17829	X:519587-522052	17.2816	11.8687	-0.542076	0.00055	0.0033225	no	0.686782
CG1785	X:8608983-8614276	45.338	31.4833	-0.526136	0.00205	0.0103601	no	0.694413
CG18178	3L:9710885-9712244	36.9258	27.0719	-0.447835	0.00305	0.0143236	no	0.733143
CG18213	3R:12862115-12865924	4.77666	2.34182	-1.02837	5e-05	0.000385856	no	0.490263
CG18324	2R:10056360-10057738	19.7033	13.1486	-0.583523	0.0087	0.0343113	no	0.66733
CG1845	2R:3160036-3165580	19.1442	14.7169	-0.379432	0.0082	0.0326551	no	0.768739
CG18749	3R:4069780-4073577	40.9556	30.8581	-0.408414	0.0094	0.0365006	no	0.753453
CG1910	3R:27571765-27576745	152.122	120.829	-0.33226	0.00985	0.0378703	no	0.79429
CG1972	3R:25571075-25573235	44.9182	32.4186	-0.470478	0.0006	0.0035816	no	0.721725
CG2091	3R:1579039-1580495	48.0401	34.6649	-0.470765	0.00085	0.00486379	no	0.721583
CG2100	3R:1559262-1562118	37.2913	27.1441	-0.4582	0.00455	0.02008	no	0.727894
CG2121	2R:4283897-4299228	3.86929	0.614802	-2.65388	0.0004	0.00250285	no	0.158893
CG2199	3L:1339456-1342403	21.7746	15.3478	-0.504619	0.0002	0.00137166	no	0.704849
CG2218	3R:26251381-26253998	97.8838	67.6248	-0.533518	0.0001	0.000742932	no	0.690868
CG2264	2R:5940047-5954060	55.0312	37.3436	-0.559388	5e-05	0.000385856	no	0.67859
CG2310	3R:25317245-25319235	299.731	202.063	-0.568862	5e-05	0.000385856	no	0.674148
CG2658	X:2588754-2592248	18.3359	13.6702	-0.423636	0.00555	0.023512	no	0.745543
CG2765	2R:20847360-20852606	23.8633	17.5806	-0.440811	0.00195	0.0099486	no	0.736721
CG2781	3R:3807538-3821568	4.1094	2.21049	-0.894559	0.00815	0.0324862	no	0.537911
CG2990	X:9904535-9908312	2.40796	0.837012	-1.52449	5e-05	0.000385856	no	0.347602
CG30015	2R:6726598-6762229	28.0997	21.5995	-0.379552	0.0037	0.0168318	no	0.768674
CG30020	2R:6774319-6781865	29.3485	20.4479	-0.521335	0.0002	0.00137166	no	0.696727
CG30069	2R:10073323-10085730	5.37918	3.58948	-0.583612	5e-05	0.000385856	no	0.667291
CG30080	2R:11586230-11589199	2.49754	0.404021	-2.628	0.00025	0.00166137	no	0.161768
CG3011	X:5802157-5810826	201.875	151.69	-0.412338	0.00205	0.0103601	no	0.751406
CG30118	2R:14318030-14327986	54.6962	38.2704	-0.515213	0.00025	0.00166137	no	0.69969
CG30159	2R:2880180-2891766	98.8406	70.4372	-0.488766	0.00105	0.00585185	no	0.712634
CG3016	X:5771028-5773866	20.5941	14.7796	-0.478624	0.00145	0.00771472	no	0.717662
CG30183	2R:19578313-19585198	16.2897	11.1366	-0.548647	0.00145	0.00771472	no	0.683659
CG30190	2R:18812612-18821208	54.1193	37.3685	-0.534322	0.0032	0.0149055	no	0.690484
CG30217	2R:18543053-18544499	4.96126	1.14739	-2.11235	0.0032	0.0149055	no	0.23127
CG3033	X:5764873-5767397	48.2808	32.5209	-0.570083	5e-05	0.000385856	no	0.673578
CG3071	X:2156872-2158858	27.5346	20.6956	-0.411921	0.0071	0.0287967	no	0.751622
CG31122	3R:14232352-14238589	25.1194	19.4465	-0.36929	0.00595	0.0249353	no	0.774163
CG31150	3R:11670187-11679301	2.49383	1.33794	-0.898347	0.0059	0.02475	no	0.5365
CG31352	3R:5520443-5531165	16.5623	12.6602	-0.387599	0.01295	0.0473048	no	0.764399
CG31472	3R:3636284-3638731	75.9145	57.6525	-0.396992	0.00305	0.0143236	no	0.75944
CG31548	3R:1461621-1462567	64.7788	43.8439	-0.563146	0.0004	0.00250285	no	0.676825
CG31739	2L:16827097-16831705	33.153	26.7091	-0.311809	0.0131	0.0476495	no	0.805631
CG31743	2L:16879516-16886323	12.0728	8.38119	-0.526534	0.0018	0.00928843	no	0.694221
CG31793	2L:19003409-19008231	5.75637	4.05342	-0.50602	0.0051	0.0219752	no	0.704163
CG32048	3L:9540319-9588339	110.624	78.8005	-0.489391	0.00015	0.00106015	no	0.712327
CG32075	3L:11055825-11058037	12.4406	9.13585	-0.445442	0.00565	0.0238766	no	0.734358
CG32164	3L:16596186-16602320	27.9342	20.064	-0.477428	0.00655	0.0269747	no	0.718259
CG32195	3L:18106060-18115089	1.10227	0.568789	-0.954511	0.00295	0.0139381	no	0.516016
CG32694	X:9883727-9900918	0.777495	0.150986	-2.36442	0.00295	0.0139381	no	0.194195
CG32732	X:6811592-6862746	17.8932	12.7336	-0.490772	0.00225	0.011173	no	0.711645
CG32756	X:5839714-5841884	13.1035	9.53609	-0.458483	0.0045	0.0199106	no	0.727751
CG32758	X:5613767-5632072	8.07655	6.11048	-0.402455	0.0047	0.0205724	no	0.756571
CG32803	X:1794720-1795971	52.166	37.2811	-0.484666	0.0018	0.00928843	no	0.714663
CG32982	2L:9125750-9163721	27.8625	20.2303	-0.461805	0.00095	0.00537497	no	0.726076
CG33172	X:15663858-15666857	4.85716	3.11465	-0.641045	0.0028	0.013362	no	0.641249
CG33205	3L:9809169-9827447	3.23593	0.733686	-2.14095	5e-05	0.000385856	no	0.226731
CG33217	3L:23119130-23125309	16.5438	12.334	-0.423645	0.00305	0.0143236	no	0.745536
CG33298	2L:9495471-9520696	18.0391	14.0911	-0.356338	0.006	0.0251202	no	0.781142
CG33505	2R:10746349-10748250	19.5721	13.2848	-0.55902	0.0011	0.00608302	no	0.678762
CG3353	3R:17042987-17044511	35.3198	25.1823	-0.488067	0.003	0.0141431	no	0.71298
CG3363	2R:20074225-20082813	21.8497	17.3212	-0.335074	0.0092	0.0359031	no	0.792743
CG3408	3L:9499917-9502680	43.776	31.8609	-0.458352	0.0008	0.00462714	no	0.727817
CG34120	X:20994979-21011281	10.3842	7.99192	-0.377771	0.01055	0.0400582	no	0.769623
CG34315	2R:9090247-9094027	4.38904	2.38088	-0.882408	0.0019	0.00972246	no	0.54246
CG34317	3R:25882574-25883853	39.2238	29.733	-0.399662	0.00795	0.0318223	no	0.758035
CG34325	X:16608479-16620988	4.36962	2.0353	-1.10227	0.00975	0.0375702	no	0.465784
CG34349	3R:20882811-20890070	12.7366	9.86684	-0.368317	0.009	0.0352188	no	0.774684
CG34415	2R:12833059-12842660	24.5307	17.3577	-0.499013	0.0037	0.0168318	no	0.707591
CG3511	2R:20459191-20462027	17.5747	12.4179	-0.50108	0.00155	0.00817065	no	0.706578
CG3618	3L:20806452-20809175	9.52352	6.65311	-0.517466	0.00395	0.0178364	no	0.698598
CG3625	2L:283384-291010	60.0042	43.4857	-0.464523	0.001	0.00561337	no	0.724711
CG3626	X:4260451-4265169	23.3467	17.6049	-0.407238	0.00225	0.011173	no	0.754064
CG3735	2R:19824908-19827274	14.6587	10.7228	-0.451079	0.00455	0.02008	no	0.731497
CG3790	2R:8760288-8762518	3.17532	1.19041	-1.41545	0.00295	0.0139381	no	0.374894
CG3797	3L:19052868-19055902	40.5481	30.4771	-0.411907	0.0016	0.0083929	no	0.751628
CG3800	2R:18822091-18824453	1114.54	763.892	-0.545012	5e-05	0.000385856	no	0.685388
CG3817	3R:10724434-10725339	61.4783	43.7086	-0.49216	0.00125	0.00677261	no	0.71096
CG3880	2R:20648285-20650069	70.7825	53.5107	-0.403566	0.0068	0.0277905	no	0.755988
CG3973	X:6494097-6546131	4.30261	1.88037	-1.19419	5e-05	0.000385856	no	0.43703
CG4199	X:1960467-1969933	93.7647	68.8337	-0.445931	0.0029	0.0137702	no	0.734111
CG42232	3R:12283983-12295350	23.642	19.2533	-0.296244	0.01305	0.0475686	no	0.814368
CG42238	2L:20965519-21051954	12.2789	8.72169	-0.493501	0.0015	0.00795604	no	0.710299
CG42268	3L:9727111-9753495	10.6193	7.55372	-0.491428	0.0008	0.00462714	no	0.71132
CG42319	2R:9147616-9153843	3.37491	0.55174	-2.61279	0.00025	0.00166137	no	0.163483
CG42348	3L:20142713-20190804	6.49218	5.00978	-0.373954	0.01075	0.0406554	no	0.771664
CG42377	3L:277436-290334	1.67281	0.98435	-0.765035	0.00685	0.0279548	no	0.588441
CG42497	2R:17576416-17578643	121.074	93.4273	-0.373971	0.00955	0.0369825	no	0.771655
CG42516	2R:4015135-4018837	40.9773	30.4022	-0.430651	0.0057	0.0240286	no	0.741928
CG4288	3R:16333111-16338169	2.66873	0.239187	-3.47994	0.00075	0.00436447	no	0.0896258
CG4364	2L:9708920-9711269	175.465	137.73	-0.349349	0.00425	0.0189316	no	0.784943
CG4390	3R:15882139-15885487	322.612	228.458	-0.497872	0.0002	0.00137166	no	0.708151
CG4484	3L:9196164-9201953	2.28003	0.883381	-1.36795	0.00115	0.00632685	no	0.387443
CG4554	2R:18370845-18379538	11.7888	8.94713	-0.397915	0.0027	0.013008	no	0.758952
CG4567	2L:7220271-7223079	9.45625	6.92675	-0.449089	0.0066	0.0271154	no	0.732505
CG4610	2R:18379718-18381800	11.4127	7.72633	-0.562782	0.0031	0.0145266	no	0.676994
CG4847	2R:13399027-13401364	2.94018	0.134858	-4.44639	0.00015	0.00106015	no	0.0458673
CG4880	X:16780862-16782762	21.2877	14.6554	-0.538585	0.0004	0.00250285	no	0.688445
CG5190	2R:14338772-14340241	19.886	14.5497	-0.450761	0.00875	0.0343977	no	0.731655
CG5199	3L:20435518-20445961	21.3346	14.6402	-0.54326	0.00205	0.0103601	no	0.686219
CG5290	3L:17901242-17905657	12.1588	8.98177	-0.436924	0.01385	0.0498693	no	0.738705
CG5326	3R:18357895-18365639	35.7592	25.3142	-0.498367	0.001	0.00561337	no	0.707907
CG5402	3R:23327813-23328678	0.834918	0	#NAME?	0.00075	0.00436447	no	0
CG5451	3R:14804696-14806829	25.444	17.7876	-0.516459	0.00015	0.00106015	no	0.699088
CG5522	2R:12671195-12679981	12.5126	8.61233	-0.538904	0.0003	0.0019424	no	0.688293
CG5746	3R:20171506-20174509	68.5611	55.0122	-0.31764	0.0104	0.0396116	no	0.802382
CG5800	X:17530315-17533038	21.8572	16.5129	-0.404516	0.00765	0.0307941	no	0.75549
CG5847	3L:20410331-20417322	2.42588	0.0646982	-5.22864	0.0001	0.000742931	no	0.02667
CG5888	2L:16400168-16450500	22.4959	15.5796	-0.53001	0.00405	0.0182112	no	0.692553
CG6163	3L:11355085-11357985	26.7477	19.2938	-0.471276	0.00155	0.00817065	no	0.721326
CG6236	3R:11151038-11154000	34.0742	26.0307	-0.388469	0.00585	0.0245522	no	0.763942
CG6295	3R:22831620-22832777	1.04938	0	#NAME?	5e-05	0.000385856	no	0
CG6353	3R:17486907-17488680	20.8839	15.41	-0.438526	0.00925	0.0360653	no	0.737889
CG6459	2R:13558813-13560148	156.227	116.593	-0.422159	0.00115	0.00632685	no	0.746305
CG6479	3L:17330269-17332358	36.7339	24.895	-0.561255	5e-05	0.000385856	no	0.677712
CG6522	2R:13353378-13356681	26.8228	20.1326	-0.41393	0.00245	0.0120337	no	0.750578
CG6579	2L:12175447-12177886	4.8706	0.87553	-2.47587	0.00155	0.00817065	no	0.179758
CG6610	3L:6068636-6069358	46.1157	34.3703	-0.424096	0.00975	0.0375702	no	0.745306
CG6695	3R:20480883-20485101	44.5363	34.4483	-0.37055	0.0049	0.0212847	no	0.773488
CG6724	2L:10768233-10769964	49.423	34.5595	-0.516102	0.0002	0.00137166	no	0.699259
CG6751	2R:6763258-6764801	51.0846	36.2852	-0.493508	0.0006	0.0035816	no	0.710296
CG6764	3R:7255782-7257397	301.281	212.169	-0.505898	0.0001	0.000742932	no	0.704223
CG6845	3L:146452-149056	30.4405	20.3822	-0.57868	0.00015	0.00106015	no	0.669575
CG6933	3L:20211601-20213497	0.753452	0	#NAME?	5e-05	0.000385856	no	0
CG6937	3R:18409073-18412347	72.9106	56.236	-0.374636	0.00825	0.0328237	no	0.771301
CG6954	3R:18492482-18508211	25.1605	17.1082	-0.556471	5e-05	0.000385856	no	0.679963
CG6962	3R:7702956-7708257	20.2268	14.8557	-0.445254	0.00525	0.0225195	no	0.734456
CG7006	3R:20676340-20677107	71.3648	52.7213	-0.436826	0.00575	0.0241799	no	0.738758
CG7145	3L:21829911-21834464	70.0247	50.0231	-0.485269	0.0001	0.000742932	no	0.714364
CG7175	3R:14047243-14049403	13.1736	9.72652	-0.437655	0.0075	0.0302757	no	0.738334
CG7182	3L:8337520-8339430	41.5301	31.3748	-0.404553	0.00415	0.0185828	no	0.755471
CG7255	3L:15297468-15304295	0.754801	0.115483	-2.70842	0.00945	0.036645	no	0.152998
CG7267	X:8965480-8972528	705.569	513.077	-0.45961	0.0004	0.00250285	no	0.727182
CG7275	3L:15492063-15493661	44.7876	33.1501	-0.434088	0.0034	0.0156751	no	0.740162
CG7332	X:18778534-18781655	34.7467	26.9246	-0.367954	0.0107	0.04052	no	0.774882
CG7356	2L:8011406-8026901	3.48521	1.14818	-1.60189	0.0003	0.0019424	no	0.329444
CG7369	3L:22735163-22741716	27.0899	21.0535	-0.363693	0.0061	0.0254518	no	0.777172
CG7402	3L:17880804-17884504	0.858741	0	#NAME?	5e-05	0.000385856	no	0
CG7432	3R:15490817-15496549	2.09617	0.0629003	-5.05854	0.0047	0.0205724	no	0.0300073
CG7523	3R:13494940-13496616	76.0045	59.1961	-0.360584	0.01355	0.0489744	no	0.77885
CG7580	3L:17467860-17469224	123.252	94.3515	-0.385493	0.00575	0.0241799	no	0.765517
CG7671	3R:14192377-14193635	65.2321	48.844	-0.4174	0.00485	0.0210996	no	0.748772
CG7713	3R:13620787-13622039	169.903	127.948	-0.40916	0.0019	0.00972246	no	0.753065
CG7722	2R:6827692-6829206	14.1508	10.0723	-0.490494	0.0092	0.0359031	no	0.711783
CG7728	3L:17009653-17013370	26.1701	18.9401	-0.46648	0.00055	0.0033225	no	0.723731
CG7730	3L:17020620-17025180	3.97962	1.00243	-1.98912	0.0028	0.013362	no	0.251891
CG7744	2R:15340013-15343032	19.2955	14.23	-0.439332	0.00305	0.0143236	no	0.737478
CG7785	3R:13847326-13849413	6.80756	4.72796	-0.52592	0.0079	0.0316517	no	0.694516
CG7818	2L:8308439-8311144	32.308	23.1427	-0.481337	0.00175	0.0090577	no	0.716315
CG7839	3L:11067870-11071836	17.4371	12.1726	-0.518528	0.0002	0.00137166	no	0.698086
CG7845	2R:1961975-1963882	35.6452	25.2203	-0.499121	0.00045	0.00277317	no	0.707537
CG7884	X:19114656-19129946	2.40688	0.954419	-1.33447	0.00195	0.0099486	no	0.396538
CG7993	3R:14049448-14051769	70.1303	51.1491	-0.45533	0.00365	0.0166751	no	0.729344
CG8001	3L:1756158-1771650	18.7063	14.2788	-0.389649	0.009	0.0352188	no	0.763315
CG8036	3R:4493725-4499453	502.418	395.291	-0.345972	0.00325	0.0150892	no	0.786777
CG8066	3R:10393331-10394532	2.5203	0.821863	-1.61662	0.00315	0.0147206	no	0.326097
CG8086	2L:8244158-8257502	1.63153	0.382372	-2.09318	0.0002	0.00137166	no	0.234364
CG8172	2R:4894738-4901013	1.65605	0.282445	-2.5517	0.00215	0.0107701	no	0.170553
CG8202	3R:4557818-4561557	22.5101	17.3256	-0.377669	0.008	0.0320075	no	0.769681
CG8289	X:17527723-17530075	138.009	109.263	-0.336957	0.0045	0.0199106	no	0.791709
CG8300	X:6998932-7004325	116.053	79.2102	-0.551025	0.0067	0.0274735	no	0.682535
CG8316	X:17523817-17526053	0.936841	0.260604	-1.84595	0.0093	0.0362273	no	0.278173
CG8372	2L:8212038-8212881	87.693	66.483	-0.399476	0.00795	0.0318223	no	0.758133
CG8399	2R:11905243-11915666	77.6546	53.8132	-0.529112	0.0107	0.04052	no	0.692981
CG8443	2R:12074089-12083807	29.526	20.7898	-0.506111	0.0001	0.000742932	no	0.704118
CG8545	2R:8353176-8359280	48.8198	37.114	-0.395503	0.00465	0.0204057	no	0.760224
CG8611	X:17307829-17316188	15.3679	10.7539	-0.515059	0.0006	0.0035816	no	0.699764
CG8630	3R:9105444-9110316	2.18232	0.618945	-1.81798	0.00315	0.0147206	no	0.283618
CG8632	2R:8540311-8543248	22.9028	16.896	-0.43884	0.00245	0.0120337	no	0.737726
CG8771	2R:8567549-8573670	23.0034	15.6804	-0.552889	5e-05	0.000385856	no	0.681656
CG8801	2R:5283861-5286255	351.797	238.423	-0.561218	5e-05	0.000385856	no	0.677729
CG8831	2R:8315953-8318600	30.1005	20.4759	-0.555864	0.00015	0.00106015	no	0.680251
CG8837	2L:3320254-3323141	1.12601	0	#NAME?	5e-05	0.000385856	no	0
CG8924	X:15835111-15838482	15.3409	11.8493	-0.372578	0.01105	0.0416612	no	0.772399
CG8925	3R:11997730-12006200	2.26733	0.165352	-3.77738	0.00015	0.00106015	no	0.0729281
CG8939	X:15891069-15893732	50.1886	34.5995	-0.53661	5e-05	0.000385856	no	0.68939
CG9034	X:9053540-9054018	194.077	142.451	-0.446162	0.0038	0.0172409	no	0.733992
CG9135	2L:6050828-6053498	312.165	228.989	-0.447031	0.00015	0.00106015	no	0.733551
CG9143	2R:16162190-16166501	17.2565	12.3032	-0.488111	0.0025	0.0122162	no	0.71296
CG9220	X:15480026-15484961	22.9187	17.7721	-0.366914	0.01335	0.0484355	no	0.775441
CG9246	2L:21163610-21168344	45.9645	33.7788	-0.444401	0.0037	0.0168318	no	0.734889
CG9286	3R:9606713-9607808	48.8756	37.8112	-0.370298	0.0138	0.0497311	no	0.773621
CG9297	3R:9597319-9605037	0.969261	0.281365	-1.78444	0.00085	0.00486379	no	0.290288
CG9300	3L:19545521-19547872	25.5967	17.6963	-0.532507	0.0004	0.00250285	no	0.691351
CG9305	2L:13371426-13373853	26.0841	17.9116	-0.542276	0.0004	0.00250285	no	0.686687
CG9413	X:14478765-14496613	2.26652	0.24016	-3.23841	5e-05	0.000385856	no	0.10596
CG9510	2L:8939779-8943264	2.79344	1.62081	-0.785327	0.00535	0.0228	no	0.58022
CG9619	3L:19274463-19281669	2.79553	0.714366	-1.96839	5e-05	0.000385856	no	0.255539
CG9630	3R:4093656-4095604	19.6233	14.5999	-0.426614	0.00695	0.0283089	no	0.744008
CG9663	2L:3294925-3303129	9.28952	6.37909	-0.542253	0.00115	0.00632685	no	0.686697
CG9705	3L:16773200-16775519	192.906	146.777	-0.394272	0.0012	0.00656818	no	0.760873
CG9796	3R:9223556-9227580	875.721	596.383	-0.554234	5e-05	0.000385856	no	0.681019
CG9855	3R:221885-223609	42.5007	30.3137	-0.487518	0.0006	0.0035816	no	0.713252
CG9902	X:16437584-16441519	7.1438	5.1058	-0.484555	0.00315	0.0147206	no	0.714718
CG9996	3R:20898450-20900329	38.96	27.5968	-0.497492	0.00015	0.00106015	no	0.708337
Chd64	3L:4114288-4122423	273.865	207.804	-0.398237	0.00085	0.00486379	no	0.758783
chinmo	2L:1651259-1698617	1.18266	0.418765	-1.49782	0.00035	0.00223239	no	0.354087
chp	3R:27029903-27036452	2.99333	1.52889	-0.969269	0.00095	0.00537497	no	0.510766
Chrac-14	2L:8437410-8442352	83.3739	55.9771	-0.574758	0.0138	0.0497311	no	0.671398
Coprox	2L:6964425-6965813	61.5105	45.9624	-0.420381	0.0041	0.0183974	no	0.747229
cos	2R:3269668-3274617	24.6938	19.4509	-0.34431	0.0063	0.0261462	no	0.787684
Cpr49Af	2R:8293509-8293948	1.0394	0	#NAME?	0.001	0.00561337	no	0
Cpsf160	2R:10386193-10390978	17.7088	13.3528	-0.40732	0.00235	0.0116091	no	0.754021
Cpsf73	3R:14485113-14489250	43.5849	31.329	-0.476331	0.00575	0.0241799	no	0.718804
CR33328	3R:9461213-9472026	106.154	74.2572	-0.515559	0.00645	0.0266268	no	0.699523
crm	X:2626410-2632810	16.5438	11.5781	-0.514891	0.0013	0.00701689	no	0.699845
crn	X:2141609-2144014	37.2416	29.389	-0.34164	0.01245	0.0457908	no	0.789144
CstF-50	3R:27561224-27562664	45.2794	30.4553	-0.572162	0.00015	0.00106015	no	0.672608
csul	2R:12152179-12154464	35.4205	24.566	-0.527921	0.0003	0.0019424	no	0.693553
CycA	3L:11820296-11826677	102.71	77.5611	-0.405165	0.00095	0.00537497	no	0.755147
Cyp12a5	3R:14958173-14960429	0.926886	0.189771	-2.28813	0.00385	0.0174308	no	0.20474
Cyp4e1	2R:4334973-4339404	3.76869	1.94293	-0.955825	0.0077	0.0309663	no	0.515545
Cyp9f2	3R:8229056-8231809	3.67493	1.70404	-1.10875	0.00475	0.0207066	no	0.463693
Dbp45A	2R:4975357-4982173	24.4375	17.288	-0.49932	0.0034	0.0156751	no	0.707437
debcl	2R:2536159-2540347	40.5782	31.1752	-0.380305	0.0101	0.038589	no	0.768275
desat1	3R:8265321-8273338	142.517	99.5235	-0.518022	5e-05	0.000385856	no	0.698327
dgt2	2L:11989937-11990834	76.7178	54.0527	-0.505196	0.0011	0.00608302	no	0.704565
dgt3	2R:16879780-16881841	27.6493	18.7762	-0.558339	0.00025	0.00166137	no	0.679084
disco	X:16104630-16110767	24.3569	18.712	-0.380368	0.0063	0.0261462	no	0.768242
dm	X:3267215-3280049	19.6002	13.3956	-0.549107	5e-05	0.000385856	no	0.683442
drd	X:15019787-15031344	1.94807	0.144119	-3.75672	5e-05	0.000385856	no	0.0739804
Dsp1	X:16227644-16232927	91.8243	68.9949	-0.412385	0.0007	0.00411544	no	0.75138
eater	3R:22921588-22925401	0.972528	0.242128	-2.00597	0.0012	0.00656818	no	0.248968
ebi	2L:415068-419642	51.1639	39.7422	-0.364455	0.0057	0.0240286	no	0.776763
eco	3L:7328434-7332088	25.4765	19.0873	-0.416556	0.00235	0.0116091	no	0.749212
egg	2R:20663056-20667437	34.6017	27.6228	-0.324984	0.0108	0.0407905	no	0.798308
Egm	2R:7504373-7506515	26.9212	20.5605	-0.388869	0.0117	0.0436128	no	0.763729
Exp6	X:365084-370625	40.1634	31.5059	-0.350258	0.00505	0.0218146	no	0.784443
Fas3	2L:18320100-18392575	302.114	233.445	-0.37201	0.002	0.0101613	no	0.772705
Fcp1	2R:20453081-20459106	20.469	14.2596	-0.521501	0.002	0.0101613	no	0.696644
fd96Cb	3R:20920830-20921655	340.8	268.577	-0.343591	0.00865	0.0341456	no	0.788078
Fhos	3L:8747242-8791819	6.57308	4.69754	-0.484662	0.00365	0.0166751	no	0.714663
Flo	2R:11453771-11456907	43.3105	30.0874	-0.525558	0.0003	0.0019424	no	0.694691
foi	3L:8518343-8527084	29.3066	22.2324	-0.398563	0.0026	0.01264	no	0.758614
fon	2L:19383386-19386202	4.39304	1.16316	-1.91717	0.00105	0.00585185	no	0.264773
Fs(2)Ket	2L:20734914-20739779	68.9888	51.0482	-0.434502	0.00045	0.00277317	no	0.739949
ftz-f1	3L:18745013-18791831	3.53025	0.423646	-3.05884	5e-05	0.000385856	no	0.120005
fu12	2L:8449690-8463990	1.5477	0.556197	-1.47646	0.0126	0.0461838	no	0.35937
galectin	2L:72387-76211	30.9982	23.2211	-0.416751	0.003	0.0141431	no	0.749111
Gapdh1	2R:3679402-3693904	463.974	334.14	-0.473592	0.0092	0.0359031	no	0.72017
gfzf	3R:2970464-2977001	23.7129	17.3301	-0.452395	0.0042	0.0187577	no	0.73083
Glycogenin	2R:17087978-17102485	65.4811	44.429	-0.559577	5e-05	0.000385856	no	0.678501
GlyP	2L:2130814-2137296	87.0263	65.8586	-0.402081	0.00135	0.00725477	no	0.756767
gp210	2R:1648372-1660077	69.8299	50.2132	-0.475779	5e-05	0.000385856	no	0.719079
Gpi1	X:16253372-16255308	11.2908	7.85764	-0.52298	0.0049	0.0212847	no	0.695933
Grip128	X:15361923-15366117	16.0476	11.7689	-0.447374	0.00315	0.0147206	no	0.733374
gro	3R:21867431-21874621	103.196	82.8286	-0.317182	0.0097	0.0374618	no	0.802634
GstD3	3R:8198789-8199535	138.129	99.5748	-0.472168	0.0005	0.00305057	no	0.720883
gwl	3R:14572093-14576082	16.38	11.4368	-0.518245	0.0003	0.0019424	no	0.698217
Hcf	4:380577-395610	25.727	20.7684	-0.308894	0.01005	0.0384151	no	0.807261
Hdac3	3R:1298531-1300320	62.841	49.2935	-0.350308	0.01125	0.0422664	no	0.784416
heph	3R:27676703-27819000	219.206	148.803	-0.558878	5e-05	0.000385856	no	0.678827
His2Av	3R:22692652-22694630	1089.27	763.706	-0.512271	5e-05	0.000385856	no	0.701117
His3.3A	2L:5055057-5058241	403.553	308.754	-0.386301	0.0034	0.0156751	no	0.765089
Hlc	X:21256544-21258967	48.2936	36.4096	-0.407512	0.0025	0.0122162	no	0.753922
HP4	3L:7968537-7969257	167.623	129.252	-0.375031	0.00705	0.0286481	no	0.771087
Hsp60	X:11002505-11006341	347.641	275.945	-0.333215	0.00425	0.0189316	no	0.793764
icln	2R:13478470-13479999	111.632	80.5879	-0.470116	0.001	0.00561337	no	0.721907
ifc	2L:5986323-5988858	45.5539	35.0265	-0.37913	0.00525	0.0225195	no	0.768902
Iswi	2R:8524122-8528133	81.8804	57.411	-0.51219	5e-05	0.000385856	no	0.701157
Jafrac1	X:13223880-13226030	703.042	566.413	-0.311755	0.0086	0.0339952	no	0.80566
Jheh3	2R:14747879-14749576	4.05556	1.35325	-1.58347	0.0036	0.0164643	no	0.333678
jigr1	3R:21463548-21475972	72.0166	49.9594	-0.527573	5e-05	0.000385856	no	0.693721
jim	3L:22789076-22826488	39.3826	28.6917	-0.456925	0.00035	0.00223239	no	0.728537
Jon74E	3L:17539967-17542227	2.05127	0.0854557	-4.58519	0.01225	0.04523	no	0.0416599
Klp3A	X:2493189-2498085	39.1655	27.1595	-0.528125	5e-05	0.000385856	no	0.693455
koi	2R:2702564-2705704	9.24592	6.60452	-0.485363	0.0021	0.0105629	no	0.714317
KP78a	3R:7172013-7178853	32.2886	23.5313	-0.456442	0.00145	0.00771472	no	0.72878
kraken	2L:852766-854539	38.5253	27.5031	-0.486212	0.0034	0.0156751	no	0.713897
Kr-h1	2L:6081807-6096498	34.9043	23.9758	-0.541825	0.00015	0.00106015	no	0.686901
L	2R:10368707-10384817	41.2929	28.3141	-0.544374	5e-05	0.000385856	no	0.685689
l(1)G0095	X:8449275-8452794	27.5262	19.488	-0.498222	0.0006	0.0035816	no	0.70798
l(1)G0196	X:21884236-21909502	11.9906	9.1207	-0.394684	0.0116	0.0433343	no	0.760654
l(2)03659	2R:5277962-5282705	3.52912	1.17175	-1.59065	5e-05	0.000385856	no	0.332023
l(2)09851	2R:1642032-1643558	74.5115	57.4529	-0.375083	0.0054	0.022956	no	0.771061
l(2)35Df	2L:15752252-15755905	23.4719	15.7677	-0.573964	5e-05	0.000385856	no	0.671769
l(2)k07824	2R:12233342-12235003	30.7936	21.8729	-0.493487	0.0009	0.00512934	no	0.710307
l(3)04053	3L:22731701-22734484	22.238	17.2368	-0.36753	0.013	0.047447	no	0.775106
La	2L:20348392-20350328	185.176	146.951	-0.333565	0.0061	0.0254518	no	0.793575
Lam	2L:5542526-5546642	211.308	154.064	-0.455822	0.00015	0.00106015	no	0.729097
lds	3R:3746155-3793130	43.7642	29.6821	-0.560159	0.00015	0.00106015	no	0.678228
lin-52	X:5646541-5648917	54.0478	37.2621	-0.536528	0.00325	0.0150892	no	0.689429
Lmpt	3L:16858399-16915587	20.1515	14.7374	-0.451405	0.00155	0.00817065	no	0.73133
Lsd-2	X:14965488-14970236	93.9882	73.4569	-0.355582	0.00415	0.0185828	no	0.781554
lwr	2L:541234-542572	344.207	277.183	-0.312436	0.00885	0.034727	no	0.80528
LysB	3L:1207370-1207868	1.06139	0	#NAME?	0.0025	0.0122162	no	0
Mapmodulin	2R:13753826-13759515	222.862	173.822	-0.35854	0.0025	0.0122162	no	0.779954
MBD-R2	3R:8177864-8182024	36.2763	28.6069	-0.342667	0.00875	0.0343977	no	0.788584
mbt	X:16504736-16508889	33.4308	26.1295	-0.355498	0.00675	0.0276125	no	0.7816
Mdh	3R:22977362-22983325	34.4168	25.0992	-0.455472	0.00155	0.00817065	no	0.729272
Mdr65	3L:6233599-6238836	1.65402	0.478924	-1.78811	0.00015	0.00106015	no	0.289552
mei-41	X:16285793-16293601	7.08062	4.79332	-0.56285	0.0004	0.00250285	no	0.676963
mei-9	X:4208262-4212834	11.6057	8.54291	-0.442032	0.00505	0.0218146	no	0.736096
mfrn	3R:23768510-23773731	15.7577	12.3033	-0.357013	0.0131	0.0476495	no	0.78078
mkg-p	3L:8392268-8398372	16.2994	11.4022	-0.515496	0.00565	0.0238766	no	0.699547
Mms19	3R:1058267-1063037	23.8633	17.6061	-0.438721	0.00195	0.0099486	no	0.73779
mod	3R:27877793-27880696	203.116	157.566	-0.366349	0.0019	0.00972246	no	0.775744
mod(mdg4)	3R:17177330-17203121	449.938	327.825	-0.456801	0.00115	0.00632685	no	0.7286
mof	X:5767867-5770884	17.8042	13.0626	-0.446778	0.00325	0.0150892	no	0.733681
moi	3R:14081251-14083399	20.0815	14.0844	-0.511766	0.0005	0.00305057	no	0.701362
mol	2L:14975746-14997556	2.27878	0.683135	-1.73802	0.0014	0.00748122	no	0.299781
mp	3L:6992567-7045670	4.42925	2.52569	-0.810388	0.0005	0.00305057	no	0.57023
mr	2R:19859955-19862935	26.8509	19.8581	-0.435241	0.00145	0.00771472	no	0.739569
mre11	2L:11282092-11284337	47.1929	33.3561	-0.50062	0.0003	0.0019424	no	0.706803
mrn	3L:15571868-15573775	39.2333	28.913	-0.440358	0.00305	0.0143236	no	0.73695
mRpL3	X:15655292-15656696	42.0682	30.2013	-0.478119	0.0016	0.0083929	no	0.717913
mRpL55	3R:14920109-14920619	41.8763	29.7924	-0.491189	0.0126	0.0461838	no	0.711438
mRpS10	3R:11055377-11056238	69.936	53.9427	-0.374606	0.0125	0.0458762	no	0.771315
msd5	3L:1331728-1333152	40.1956	28.9813	-0.471916	0.0118	0.0439282	no	0.721007
msk	3L:8109277-8117631	124.911	96.566	-0.371311	0.0017	0.00884702	no	0.773078
msl-2	2L:3462212-3466111	25.9893	18.6754	-0.47678	0.00035	0.00223239	no	0.71858
msl-3	3L:7087917-7118623	21.8197	15.0026	-0.54042	0.0077	0.0309663	no	0.687571
mst	X:21260033-21262010	19.5275	13.4433	-0.538612	0.0023	0.0113883	no	0.688429
mthl3	2R:13336037-13340099	90.104	68.4229	-0.397113	0.0014	0.00748122	no	0.759377
mthl8	3L:22946-26316	11.6546	8.53832	-0.448873	0.00295	0.0139381	no	0.732614
mtSSB	3R:12029092-12030973	145.898	110.915	-0.395517	0.00985	0.0378703	no	0.760223
Muc68Ca	3L:11603764-11613172	1.00305	0.0733969	-3.77254	5e-05	0.000385856	no	0.0731737
mus210	2R:11198990-11205347	52.8457	40.3871	-0.387891	0.00185	0.00951778	no	0.764246
mus309	3R:7561168-7567505	6.54986	4.37687	-0.581563	0.0005	0.00305057	no	0.668239
muskelin	2R:8516471-8519883	8.46343	6.06321	-0.481162	0.00935	0.0363724	no	0.716401
mxc	X:9130833-9137237	13.9628	9.60379	-0.539912	5e-05	0.000385856	no	0.687813
Myo31DF	2L:10491681-10506778	29.0976	20.7167	-0.490106	0.00015	0.00106015	no	0.711973
nab	3L:4153617-4160932	3.60905	1.25202	-1.52736	0.0041	0.0183974	no	0.346911
Nap1	2R:19792695-19794837	726.916	543.291	-0.420063	0.00025	0.00166137	no	0.747392
Neurochondrin	3R:2294133-2296739	2.06754	0.928807	-1.15446	0.01235	0.0455403	no	0.449233
Nf-YC	X:6712210-6714948	19.9066	14.0365	-0.504071	0.00175	0.0090577	no	0.705118
Nhe3	2L:6677834-6684357	12.9718	10.0795	-0.36395	0.013	0.047447	no	0.777032
NHP2	3L:14794489-14795289	185.643	132.601	-0.485438	0.0002	0.00137166	no	0.71428
nimB4	2L:13968279-13969973	2.16179	0.404817	-2.41689	0.01375	0.0495926	no	0.18726
Nlp	3R:25829402-25836074	558.925	433.428	-0.366863	0.0084	0.0333277	no	0.775467
Nmd3	X:2075126-2078683	42.6613	29.3945	-0.537381	0.00055	0.0033225	no	0.68902
Nnp-1	2L:13363299-13366188	44.1379	32.1131	-0.458857	0.00045	0.00277317	no	0.727563
nop5	2L:6914299-6920274	209.662	144.491	-0.53709	0.0011	0.00608302	no	0.689162
Nop56	3R:18244816-18246790	206.469	145.02	-0.509675	5e-05	0.000385856	no	0.702381
Nopp140	3L:21825844-21829785	103.846	73.6817	-0.495069	5e-05	0.000385856	no	0.709529
nrv2	2L:6789760-6798864	86.6578	68.6811	-0.335416	0.0061	0.0254518	no	0.792555
ns1	3R:12896244-12899517	50.4102	36.3274	-0.472657	0.0016	0.0083929	no	0.720636
ns2	2R:13451844-13455950	58.8011	40.213	-0.548181	0.00015	0.00106015	no	0.683882
ns3	X:1356012-1358245	56.1152	39.6354	-0.501601	0.00035	0.00223239	no	0.706322
nub	2L:12587870-12628143	17.7311	13.7776	-0.363959	0.0112	0.0420971	no	0.77703
Nup358	3R:21075315-21084457	86.4924	67.602	-0.355508	0.00265	0.0128393	no	0.781595
Nup44A	2R:3875966-3878789	59.5501	40.9911	-0.538792	0.0003	0.0019424	no	0.688346
Nup62	2R:12231881-12233333	70.4928	54.5204	-0.370681	0.00565	0.0238766	no	0.773418
Nup75	2R:14052192-14054634	57.4281	41.8159	-0.457705	0.0006	0.0035816	no	0.728144
Nup98	3R:19599946-19607366	40.6783	28.4713	-0.51475	5e-05	0.000385856	no	0.699914
Nxt1	2R:19696767-19699496	191.056	131.605	-0.537787	0.00375	0.0170321	no	0.688829
oaf	2L:2492954-2498846	13.1184	9.33985	-0.490117	0.0007	0.00411544	no	0.711966
Obp56e	2R:15599849-15600461	1.14272	0	#NAME?	0.00165	0.00860773	no	0
obst-B	2L:10032693-10038954	106.713	82.1144	-0.378032	0.00895	0.0350873	no	0.769488
obst-E	2L:5762552-5766141	2.38666	0.254377	-3.22995	0.0104	0.0396116	no	0.106583
osp	2L:14599775-14689325	23.376	16.7052	-0.484733	0.00015	0.00106015	no	0.71463
p130CAS	3L:149678-174524	25.2758	18.0025	-0.489561	0.00125	0.00677261	no	0.712243
pad	3R:12168039-12171551	7.77947	5.69547	-0.449857	0.0112	0.0420971	no	0.732115
Parg	X:3562753-3565602	9.37675	7.11174	-0.398886	0.0115	0.0430735	no	0.758444
Pat1	X:6484810-6490667	24.8204	17.2476	-0.525133	0.00015	0.00106015	no	0.694896
pck	X:1364698-1366350	250.542	190.652	-0.394116	0.001	0.00561337	no	0.760958
Pdp1	3L:7807436-7860472	2.73714	0.913242	-1.5836	5e-05	0.000385856	no	0.333648
pen	X:21216374-21220866	59.9653	44.3399	-0.435522	0.0071	0.0287967	no	0.739426
Peritrophin-A	X:20115726-20119273	4.69326	0.402218	-3.54454	0.0006	0.0035816	no	0.0857012
phr	2R:3712996-3716181	64.7367	46.0153	-0.492472	0.00025	0.00166137	no	0.710807
pic	3R:8877977-8882454	71.2579	49.9208	-0.51341	5e-05	0.000385856	no	0.700565
pnt	3R:19116825-19171884	19.6578	15.19	-0.371975	0.01005	0.0384151	no	0.772721
polybromo	3R:20625690-20630977	25.9077	19.5169	-0.408662	0.0014	0.00748122	no	0.753324
pon	X:4530362-4533145	34.793	24.5128	-0.505266	0.00035	0.00223239	no	0.704533
Prx5037	3R:13370949-13372231	106.991	83.3936	-0.359484	0.00995	0.0381521	no	0.779445
psq	2R:6445408-6503753	86.6407	69.1895	-0.324492	0.00655	0.0269747	no	0.79858
ptip	3L:14014320-14021944	9.77569	7.65213	-0.353337	0.0119	0.0442236	no	0.782771
pyd	3R:4653199-4756978	107.886	86.2899	-0.32225	0.0082	0.0326551	no	0.799825
pzg	3L:21279162-21283410	134.652	96.4182	-0.481861	5e-05	0.000385856	no	0.716055
r	X:16549411-16564165	48.4758	32.7743	-0.564699	5e-05	0.000385856	no	0.676096
RagA	3R:4806642-4810029	27.7216	21.1177	-0.392558	0.01195	0.0443517	no	0.761778
ran	X:11038894-11042622	498.524	387.875	-0.362073	0.00205	0.0103601	no	0.778047
Ranbp9	3R:7238243-7241864	55.2893	36.956	-0.581191	5e-05	0.000385856	no	0.668411
rap	X:4561314-4573619	10.0795	7.16719	-0.491943	0.00205	0.0103601	no	0.711066
Rbf	X:691120-695490	47.8691	37.9417	-0.335309	0.0088	0.0345783	no	0.792614
Rcd1	2R:10035762-10040624	39.4901	31.5369	-0.324449	0.0133	0.048295	no	0.798603
REG	X:13106365-13108014	244.747	194.718	-0.329904	0.00585	0.0245522	no	0.795589
rept	3L:19248447-19250216	106.992	74.1192	-0.529589	5e-05	0.000385856	no	0.692755
rgn	3L:21375623-21426267	34.9951	25.0333	-0.483301	0.0032	0.0149055	no	0.715337
rho	3L:1463791-1468483	10.2612	7.49814	-0.452597	0.0037	0.0168318	no	0.730727
RhoBTB	3L:20369311-20375500	35.9616	28.2483	-0.348291	0.00855	0.0338601	no	0.785513
Rm62	3R:1826152-1834301	793.127	605.522	-0.389372	0.00135	0.00725477	no	0.763462
row	2R:11094027-11101137	81.1206	54.2023	-0.581715	5e-05	0.000385856	no	0.668169
Rpb5	2R:6785746-6786563	124.719	84.9157	-0.554582	5e-05	0.000385856	no	0.680856
Rpd3	3L:4626716-4629467	189.104	135.529	-0.480578	5e-05	0.000385856	no	0.71669
RpIII128	2R:7926594-7930138	16.8955	12.2683	-0.461707	0.00185	0.00951778	no	0.726128
Rrp1	2L:2969772-2972676	106.343	71.4731	-0.573247	5e-05	0.000385856	no	0.6721
Rrp4	2R:19442540-19443724	57.2518	38.4457	-0.574499	0.0003	0.0019424	no	0.671519
Samuel	2L:11013220-11066997	20.0677	15.5602	-0.36702	0.00815	0.0324862	no	0.775385
SCAP	2R:1913777-1923922	24.3802	18.9827	-0.361025	0.006	0.0251202	no	0.778611
SelD	2R:10156274-10158159	261.663	190.458	-0.458237	0.00015	0.00106015	no	0.727875
sev	X:10965473-10980332	1.0287	0.283778	-1.85799	0.00095	0.00537497	no	0.275861
Sfmbt	2L:13169642-13176783	31.2303	22.9341	-0.445453	0.00055	0.0033225	no	0.734354
Sirt7	3R:24881653-24884926	6.67502	4.55685	-0.550736	0.00135	0.00725477	no	0.682672
SMC1	3R:19884023-19888538	38.5376	30.5152	-0.336741	0.0074	0.0299002	no	0.791829
Smc5	3L:21562308-21566623	22.1854	15.1083	-0.554263	5e-05	0.000385856	no	0.681002
SmG	X:16533831-16534447	401.612	288.439	-0.477536	0.0005	0.00305057	no	0.718203
smo	2L:277587-283281	35.2732	27.3095	-0.369168	0.00385	0.0174308	no	0.774228
Snr1	3R:1296638-1298476	106.694	81.2066	-0.393815	0.0031	0.0145266	no	0.761117
Spargel	3R:248204-255051	24.1175	16.9743	-0.506733	0.00015	0.00106015	no	0.703817
spn-E	3R:11663158-11670138	2.34776	1.15552	-1.02275	0.0009	0.00512934	no	0.49218
Sps2	2L:10342593-10344228	23.7659	17.9133	-0.40786	0.0076	0.0306216	no	0.75374
spz4	2L:11505883-11507897	1.30102	0.183382	-2.82672	0.01015	0.0387455	no	0.140952
Ssb-c31a	2L:8211346-8211938	150.201	102.817	-0.54682	0.00035	0.00223239	no	0.684529
Sse	3L:5652793-5655341	8.69582	5.95308	-0.546688	0.0044	0.0195186	no	0.684591
Ssl1	3L:22872188-22874067	41.6446	28.3787	-0.553322	0.0001	0.000742932	no	0.68145
Ssrp	2R:19693883-19696518	136.364	97.1503	-0.489171	5e-05	0.000385856	no	0.712434
Stat92E	3R:16361404-16378034	50.7939	39.1019	-0.377414	0.00225	0.011173	no	0.769815
StIP	2R:6533229-6536139	21.5341	15.2953	-0.493537	0.00035	0.00223239	no	0.710283
Su(var)205	2L:8206205-8211133	480.138	337.233	-0.509703	5e-05	0.000385856	no	0.702367
Su(z)12	3L:19911336-19916500	29.0385	20.9376	-0.471872	0.0003	0.0019424	no	0.721029
Taf12	3R:7504098-7505408	59.7496	44.9369	-0.411027	0.00605	0.0252925	no	0.752087
Taf6	3L:19592186-19594482	38.3575	29.3028	-0.388469	0.0057	0.0240286	no	0.763939
tam	2L:13823979-13827793	8.1331	5.60468	-0.537174	0.0034	0.0156751	no	0.68912
Tfb1	2R:10250555-10252978	82.2363	60.9233	-0.43278	0.00045	0.00277317	no	0.740832
thoc6	3L:12183832-12186787	27.8784	20.1577	-0.467812	0.00175	0.0090577	no	0.723058
Tif-IA	2L:22249877-22258260	40.6013	31.2019	-0.379893	0.0027	0.013008	no	0.768495
Tig	2L:6412314-6423308	3.74458	1.18387	-1.66129	5e-05	0.000385856	no	0.316156
Tina-1	2R:20828147-20829932	250.834	173.589	-0.531059	5e-05	0.000385856	no	0.692047
toc	2L:3068338-3144613	10.474	8.19456	-0.354079	0.0096	0.0371258	no	0.782372
tra2	2R:10488768-10491857	46.9545	33.1614	-0.501758	0.0028	0.013362	no	0.706245
trbl	3L:20389387-20394708	37.7083	29.5044	-0.353952	0.01055	0.0400582	no	0.782438
trsn	2R:6366515-6367612	150.401	115.281	-0.38366	0.00405	0.0182112	no	0.766491
tsh	2L:21828594-21837013	65.8391	51.9159	-0.342768	0.0078	0.0313097	no	0.788527
ttm50	X:2624251-2626218	41.0611	28.6378	-0.519853	0.00035	0.00223239	no	0.697444
U2af50	X:16250712-16253072	112.665	88.3267	-0.351116	0.0047	0.0205724	no	0.783976
Uba2	3L:8118422-8120919	227.849	162.217	-0.490153	5e-05	0.000385856	no	0.71195
Uch-L3	3L:9468818-9470073	122.951	96.9666	-0.342523	0.00685	0.0279548	no	0.788661
Ugt58Fa	2R:18529400-18531420	18.6618	13.6253	-0.453793	0.0071	0.0287967	no	0.730117
Uhg1	2R:13586601-13590827	19.4749	13.7979	-0.497162	0.0021	0.0105629	no	0.708497
und	2L:9763344-9766912	125.678	91.3148	-0.460816	0.00025	0.00166137	no	0.726577
unk	3R:18977274-18983592	16.6537	13.1004	-0.346234	0.00805	0.0321325	no	0.786636
vfl	X:19670019-19676961	27.9691	19.8259	-0.49645	5e-05	0.000385856	no	0.70885
vri	2L:5299646-5310996	24.4426	18.9684	-0.365798	0.00945	0.036645	no	0.776039
wac	3L:258349-259097	97.7971	69.2761	-0.497434	0.00035	0.00223239	no	0.708366
wls	3L:11158074-11162741	92.7486	73.2718	-0.340067	0.0133	0.048295	no	0.790004
woc	3R:23082314-23089758	88.4111	62.0779	-0.510149	5e-05	0.000385856	no	0.702151
xmas-2	X:17045263-17053339	11.2895	7.88403	-0.517982	0.00045	0.00277317	no	0.698351
Xpd	2R:17058459-17062009	28.7466	20.2125	-0.508143	0.00045	0.00277317	no	0.703127
XRCC1	X:5223943-5226468	14.8811	10.5052	-0.502373	0.00275	0.0131821	no	0.705942
ytr	2R:19734692-19738619	137.258	96.3097	-0.511134	0.0003	0.0019424	no	0.701669
Zw	X:19561265-19566385	25.3798	17.5777	-0.529932	0.00125	0.00677261	no	0.692586
